# Supplementary material for: Homogeneous oxidation of C–H bonds with m-CPBA catalysed by a Co/Fe system: mechanistic insights from the point of view of the oxidant
Source: Royal Society of Chemistry journal article supplement (doi:10.1039/d1cy01991k), 2021-11-09
Supplement: d1cy01991k1.pdf [file d1cy01991k1.pdf]

Electronic Supplementary Information

## **Homogeneous Oxidation of C–H bonds with *m*-CPBA Catalyzed by a Co/Fe System: Mechanistic Insights from the Point of View of the Oxidant**

*Oksana V. Nesterova,<sup>a</sup> Maxim L. Kuznetsov,<sup>a</sup> Armando J. L. Pombeiro,<sup>a,b</sup>  
Georgiy B. Shul'pin<sup>c,d</sup> and Dmytro S. Nesterov<sup>\*,a</sup>*

<sup>a</sup> Centro de Química Estrutural, Instituto Superior Técnico, Universidade de Lisboa, Av. Rovisco Pais, 1049-001 Lisboa, Portugal

<sup>b</sup> Peoples' Friendship University of Russia (RUDN University), Research Institute of Chemistry, 6 Miklukho-Maklaya st., Moscow 117198, Russia

<sup>c</sup> Semenov Federal Research Center for Chemical Physics, Russian Academy of Sciences, ulitsa Kosygina 4, Moscow 119991, Russia

<sup>d</sup> Chair of Chemistry and Physics, Plekhanov Russian University of Economics, Stremyannyi pereulok 36, Moscow 117997, Russia

## Contents

|                                                                                                                                                                            |      |
|----------------------------------------------------------------------------------------------------------------------------------------------------------------------------|------|
| Materials and methods                                                                                                                                                      | S3   |
| Synthesis and crystal structure of [Co(HSae)(Sae)]·CH <sub>3</sub> OH·H <sub>2</sub> O ( <b>2</b> )                                                                        | S3   |
| Catalytic oxidation of alkanes                                                                                                                                             | S3   |
| X-ray crystallography                                                                                                                                                      | S4   |
| Gas chromatography                                                                                                                                                         | S6   |
| Mass-spectrometry                                                                                                                                                          | S6   |
| HF-EPR Spectroscopy                                                                                                                                                        | S5   |
| Computational details                                                                                                                                                      | S7   |
| Estimate of rate constants of cyclohexane and cyclohexanol oxidation                                                                                                       | S8   |
| Experiments with <sup>18</sup> O <sub>2</sub> and H <sub>2</sub> <sup>18</sup> O and under inert conditions                                                                | S9   |
| Blank tests: checking of a non-catalytic <i>m</i> -CPBA activity                                                                                                           | S9   |
| Calculation of <sup>18</sup> O incorporation levels into normal and deuterated cyclohexanols                                                                               | S10  |
| Estimate of D incorporation levels into chlorobenzene                                                                                                                      | S11  |
| Oxygen exchange between water and tertiary 1,2-dimethylcyclohexane-1-oles and other alcohols in the presence of nitric acid and pre-catalyst <b>1</b>                      | S12  |
| Incorporation of <sup>18</sup> O from H <sub>2</sub> <sup>18</sup> O in the course of a catalyst-free oxidation                                                            | S14  |
| Estimate of <sup>18</sup> O levels in the course of <i>cis</i> -1,2-DMCH oxidation under <sup>18</sup> O <sub>2</sub> or in the presence of H <sub>2</sub> <sup>18</sup> O | S16  |
| Oxidation of cyclohexane in the presence of H <sub>2</sub> <sup>18</sup> O and oxidation of cyclohexanol                                                                   | S17  |
| Kinetic isotope effect and D-labeled species                                                                                                                               | S18  |
| Reactions at different temperatures                                                                                                                                        | S20  |
| Search for alkyl hydroperoxides                                                                                                                                            | S21  |
| Stability of complex catalytic species under catalytic conditions                                                                                                          | S23  |
| Reaction by-products                                                                                                                                                       | S24  |
| Accumulation of <sup>18</sup> O-labeled OPPh <sub>3</sub> and tertiary alcohols                                                                                            | S25  |
| HF-EPR spectra of cobalt species before and after interaction with <i>m</i> -CPBA                                                                                          | S25  |
| ESI-MS spectra of catalytic solutions                                                                                                                                      | S26  |
| <i>In situ</i> catalytic systems                                                                                                                                           | S30  |
| Reaction mass balance for <b>1</b> and <b>2</b>                                                                                                                            | S30  |
| Theoretical calculations: alternative reaction mechanisms                                                                                                                  | S32  |
| Computational details of the radical rebound mechanism                                                                                                                     | S32  |
| References                                                                                                                                                                 | S111 |

## Materials and methods

All chemicals were of reagent grade and used as received. Labeled dioxygen (99% of  $^{18}\text{O}$ ) was purchased from CortecNet. Labeled water (97% of  $^{18}\text{O}$ ) and deuterated reagents were purchased from Eurisotop (Cambridge Isotope Laboratories, Inc.) and Sigma-Aldrich. All experiments were carried out in air, unless stated otherwise. The coordination compound  $[\text{Co}^{\text{III}}_4\text{Fe}^{\text{III}}_2\text{O}(\text{Sae})_8]\cdot 4\text{DMF}\cdot \text{H}_2\text{O}$  (**1**) ( $\text{H}_2\text{Sae}$  = salicylidene-2-ethanolamine) was synthesized according to a published protocol.<sup>S1</sup> Elemental analyses for CHN and for metals (atomic absorption spectroscopy) were performed by the Microanalytical Service of the Instituto Superior Técnico. ESI-MS mass spectra were obtained using LCQ Fleet mass spectrometer with an ESI source (Thermo Scientific).

### Synthesis and crystal structure of $[\text{Co}(\text{HSae})(\text{Sae})]\cdot \text{CH}_3\text{OH}\cdot \text{H}_2\text{O}$ (**2**).

$\text{Et}_3\text{N}$  (0.28 mL, 2 mmol), 2-aminoethanol (0.12 mL, 2 mmol) and salicylic aldehyde (0.21 mL, 2 mmol) were added to 20 mL of methanol in this order and stirred for 5 min at 40 °C in a glass beaker. Then  $\text{Co}(\text{NO}_3)_2\cdot 6\text{H}_2\text{O}$  (0.29 g, 1 mmol) dissolved in methanol (20 mL) was added dropwise upon stirring, affording a dark red solution. A dark red precipitate started to form in 5 min. The mixture was stirred for 1 h, then the precipitate was filtered off producing the powdered complex **2** (yield: 0.27 g, 62%). X-ray quality brown crystals of **2** (20 mg) were deposited from the filtrate in three days. The latter crystalline fraction was used for catalytic studies. The complex **2** slowly absorbs moisture if exposed in air. Calcd. (%) for  $[\text{Co}(\text{HSae})(\text{Sae})]\cdot \text{CH}_3\text{OH}\cdot 1.9\text{H}_2\text{O}$ : C, 50.42; H, 5.98; N, 6.12. Found (%): C, 50.5; H, 5.5; N, 6.2.

The crystal structure of **2** was reported earlier ( $R_1 = 0.1361$ ), where **2** was obtained as a reaction by-product.<sup>S2</sup> Re-investigation of the structure of **2** (Figure S1, a) with higher data quality ( $R_1 = 0.0512$ ) revealed the details of H-bonding in this structure (Figure S1, b). The molecules of the complex are bridged by strong  $\text{O}-\text{H}\cdots\text{O}$  bonds into hexanuclear supramolecular moieties, bridged by the uncoordinated methanol and water molecules into a 1D chain (Figure S1, b).

### Catalytic oxidation of alkanes

The reactions were typically carried out in air in thermostated cylindrical vials with vigorous stirring. Pre-catalyst **1** and the co-catalyst (nitric acid) were introduced into the reaction mixture in the form of stock solutions in acetonitrile (typically with  $[\mathbf{1}] = 5 \times 10^{-5}$  M and  $[\text{HNO}_3] = 0.5$  M). Firstly, the solution of **1** was added to a solution of  $\text{CH}_3\text{CN}$  and  $\text{CH}_3\text{NO}_2$  (GC internal standard, final  $[\text{CH}_3\text{NO}_2] = 0.2$  M). Then the solution of nitric acid in acetonitrile (typically  $[\text{HNO}_3]_0 = 0.5$  M) was added under stirring, with the subsequent addition of alkane. Solid oxidant (*m*-CPBA) was dissolved in  $\text{CH}_3\text{CN}$  (typically 30 mg in 1 mL of  $\text{CH}_3\text{CN}$ ) and dropwise added to a hot (50 °C) solution of other components. (*CAUTION. The combination of m-CPBA with organic compounds at elevated temperatures may be explosive!*). Samples were quenched at room temperature with excess of solid  $\text{PPh}_3$ , according to developed methods,<sup>S3</sup> and directly analyzed by

GC and GC-MS techniques. A test with addition of the GC internal standard ( $\text{CH}_3\text{NO}_2$ ) only after quenching a sample with  $\text{PPh}_3$  revealed the same results as the above procedure, showing that  $\text{CH}_3\text{NO}_2$  is not oxidized or decomposed during the reaction.

*WARNING.* Nitric acid stock solution in acetonitrile must not be kept for more than one week even at low temperature because of gradual change of its concentration. After staying for a prolonged time, colorless crystals of **3** start to precipitate, found to be ammonium nitrate,  $\text{NH}_4\text{NO}_3$  (Figure S1).

### X-ray crystallography

The X-ray diffraction data for **2** and **3** were collected using a Bruker D8 Quest diffractometer with graphite-monochromated Mo  $K\alpha$  radiation. Cell parameters were retrieved and refined using Bruker SAINT on all the observed reflections. Absorption corrections were applied using SADABS.<sup>S4</sup> The structure was solved by direct methods and refined against  $F^2$  using the programs package SHELX-2018/3.<sup>S5</sup> All atoms were localized in the difference Fourier map and refined freely. The ethyl groups in **2** were found to be disordered over two positions, each with 0.5 occupation (Figure S1). The unit cell parameters of the structures **2** and **3** are consistent with those reported earlier for the respective crystal structures CCDC 724129 (for **2**) and CCDC 1592576, 1593832, 1600070, 1603205, 1603206, 1607970, 1612970, 1639855 and 1931542 (for  $\text{NH}_4\text{NO}_3$ , **3**).

Crystal data for **2**:  $\text{C}_{19}\text{H}_{25}\text{CoN}_2\text{O}_6$ ,  $M = 436.34$ ,  $a = 17.5321(14) \text{ \AA}$ ,  $b = 17.5321(14) \text{ \AA}$ ,  $c = 10.9885(10) \text{ \AA}$ ,  $V = 2925.1(5) \text{ \AA}^3$ ,  $T = 150(2) \text{ K}$ , space group  $P-3$ ,  $Z = 6$ , Mo $K\alpha$ , 36719 reflections measured, 3445 independent reflections ( $R_{\text{int}} = 0.1651$ ),  $R_1 = 0.0512$  ( $I > 2\sigma(I)$ , 2393 reflections),  $wR(F^2) = 0.1081$ , GoF ( $F^2$ ) = 1.131. CCDC deposition number 2113995.

Crystal data for **3**:  $\text{H}_4\text{N}_2\text{O}_3$ ,  $M = 80.05$ ,  $a = 5.4460(6) \text{ \AA}$ ,  $b = 5.7605(8) \text{ \AA}$ ,  $c = 4.9406(6) \text{ \AA}$ ,  $V = 154.99(3) \text{ \AA}^3$ ,  $T = 296(2) \text{ K}$ , space group  $Pmmn$ ,  $Z = 2$ , Mo $K\alpha$ , 1535 reflections measured, 259 independent reflections ( $R_{\text{int}} = 0.0310$ ),  $R_1 = 0.0458$  ( $I > 2\sigma(I)$ , 234 reflections),  $wR(F^2) = 0.1114$ , GoF ( $F^2$ ) = 1.268. CCDC deposition number 2017735.

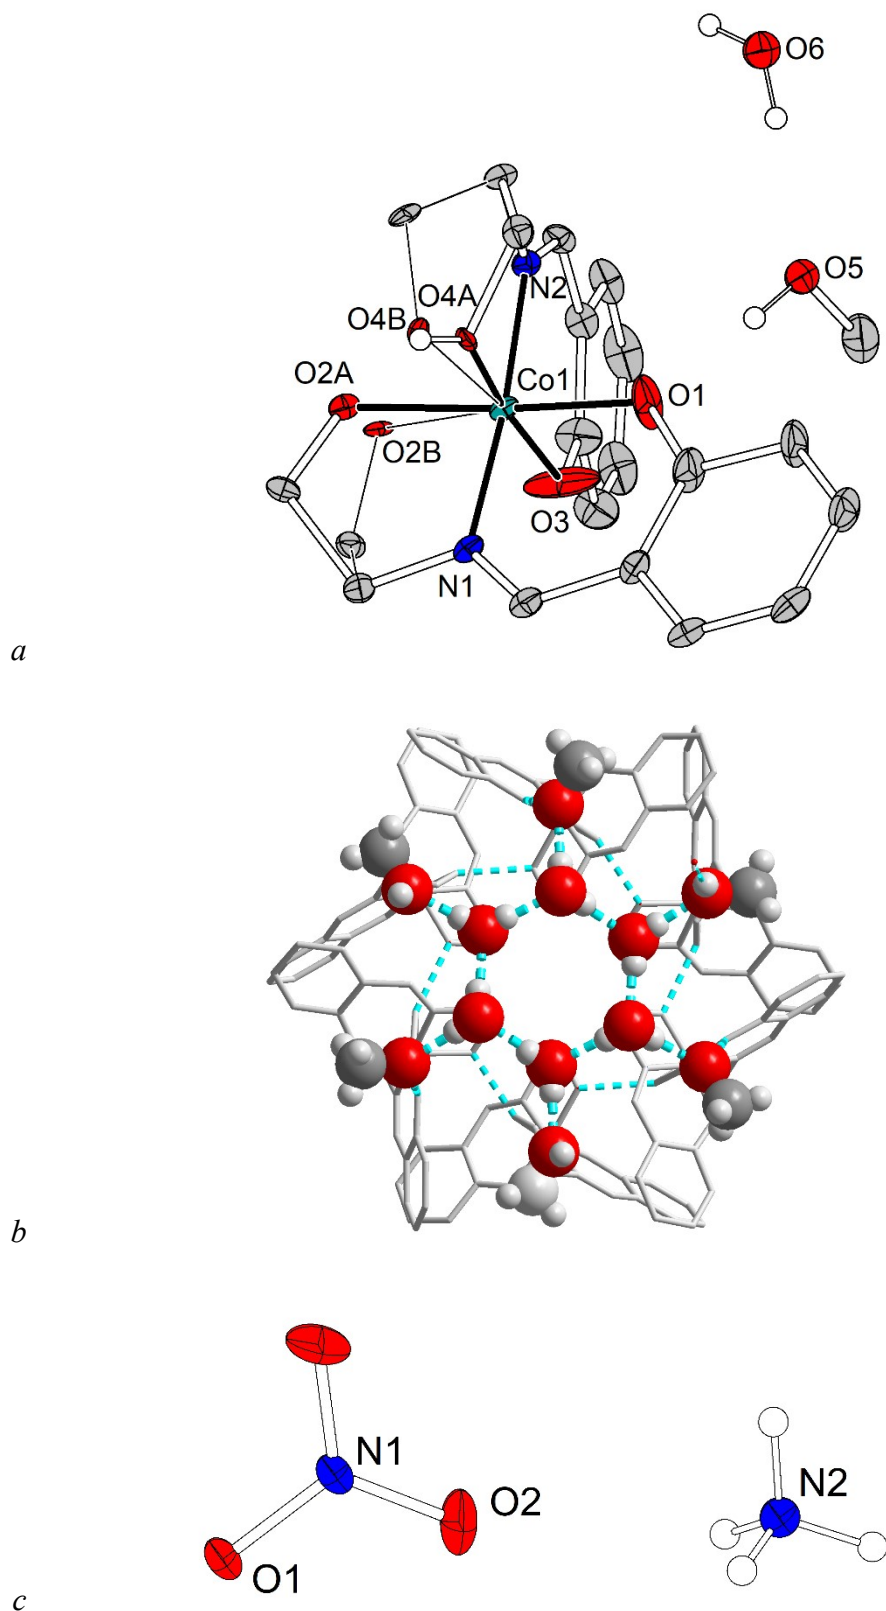

**Figure S1.** (a) Molecular structure of **2** showing the numbering scheme. N–H and N–H hydrogen atoms are omitted for clarity. (b) Fragment of the crystal structure of **2**, featuring six-membered supramolecular moiety, capped by a layer constructed from the uncoordinated methanol and water molecules. (c) The structure of the compound **3**, showing the numbering scheme. Thermal ellipsoids are shown at 30% probability level.

## Gas chromatography

A Perkin-Elmer Clarus 600 gas chromatograph, equipped with two non-polar capillary columns (pairs of SGE BPX5, 30 m × 0.22 mm × 25 μm or Phenomenex ZB-5, 30 m × 0.25 mm × 25 μm), one having an EI-MS (electron impact) detector and the other one with a FID detector, was used for analyses of the reaction mixtures. The following GC conditions have been used: 50 °C (3 min), 50–120 °C (8 degrees per minute), 120–300 °C (35 degrees per minute), 300 °C (3.11 min), 20 min total run time; 200 °C injector temperature. For analysis of oxidation products of highly-boiling compounds, such as adamantane or *cis*-decahydronaphthalene, a different program was employed: 50 °C (3 min), 50–150 °C (30 degrees per minute), 150–300 °C (14 degrees per minute), 300 °C (2.95 min), 20 min total run time; 200 °C injector temperature. Initial isothermal step (50 °C for 3 min) is important for clear separation of CH<sub>3</sub>NO<sub>2</sub> (internal standard) from CH<sub>3</sub>CN (solvent). Helium was used as the carrier gas (1 mL per minute flow). All EI mass spectra were recorded with 70 eV energy.

## Mass-spectrometry

The identification of peaks at the chromatograms was made on the basis of comparison of respective EI mass-spectra with those from the NIST database v. 2.2 (PerkinElmer TurboMass v. 5.4.2.1617 software was used). However, the patterns of mass-spectra of the main products, tertiary *cis*- and *trans*-1,2-dimethylcyclohexanol, were not found in the NIST database of the version used. The identification of these products was made by comparing the chromatograms obtained from the oxidation of *cis*- and *trans*-substrates and their mixture. The EI mass-spectra of *cis*- and *trans*-alcohols were found to be nearly equal (Figure S5), in contrast to mass-spectra of respective *cis*- and *trans*-alkanes. Further, the mass-spectrum of *trans*-alcohol was already reported elsewhere<sup>S6-S8</sup> and found to be identical to that obtained within the present studies.

Electrospray mass spectra (ESI-MS) were obtained using an LCQ Fleet mass spectrometer with an ESI source (Thermo Scientific).

## HF-EPR Spectroscopy

High-frequency EPR spectra were recorded with a home-built spectrometer at the EMR facility of NHMFL (National High Magnetic Field Laboratory, Florida State University). The instrument is a transmission-type device in which waves are propagated in cylindrical light-pipes. The microwaves were generated by a phase-locked oscillator (Virginia Diodes) operating at a frequency of 13 ± 1 GHz and generating its harmonics, of which the 4th, 8th, 12th, 16th, 24th, and 32nd were available. A superconducting magnet (Oxford Instruments) capable of reaching a field of 17 T was employed.

## Computational details

The full geometry optimization of all structures and transition states was carried out at the DFT/HF hybrid level of theory by using the B3LYP\*<sup>S9-S12</sup> with the help of the Gaussian 09<sup>S13</sup> program package. It was shown that while the popular pure functionals such as BP86 underestimate the relative stability of high spin states and many hybrid functionals with a high contribution of the Hartree-Fock term overestimate the relative stability of high spin states, the modified B3LYP functional (B3LYP\*) correctly describes the relative energies of the low and high spin states in a number of transition metal complexes.<sup>S11, S12</sup> Since the relative stability of the high and low spin states is a crucial issue for the description of Co catalysed reactions, namely the B3LYP\* functional was selected for the calculations. The B3LYP\* functional was constructed using the keywords `blyp`, `IOp(3/76=1000001500)`, `IOp(3/77=0720008500)` and `IOp(3/78=0810010000)`.

The geometry optimization was carried out by using a relativistic Stuttgart pseudopotential that describes 10 core electrons (MDF10) and the appropriate contracted basis set<sup>S14</sup> for the cobalt atom and the 6-31G\* basis set for other atoms. Single-point calculations were then performed on the basis of the equilibrium geometries found by using the 6-311+G\*\* basis set for nonmetal atoms. Cartesian d and f functions (6d and 10f) were used for all calculations. No symmetry operations were applied. The stability test was performed for key structures using the keyword `STABLE(Opt)`.

The Hessian matrix was calculated analytically for the optimized structures to prove the location of correct minima (no imaginary frequencies) or saddle points (only one imaginary frequency) and to estimate the thermodynamic parameters, with the latter calculated at 25 °C. The nature of all transition states was investigated by analysis of the vectors associated with the imaginary frequency and by the calculations of the intrinsic reaction coordinates (IRC) by using the method developed by Gonzalez and Schlegel.<sup>S15-S17</sup>

The total energies corrected for solvent effects  $E_s$  were estimated at the single-point calculations on the basis of gas-phase geometries at the CPCM-B3LYP\*/6-311+G\*\*//gas-B3LYP\*/6-31G\* level of theory using the polarizable continuum model in the CPCM version<sup>S18, S19</sup> with CH<sub>3</sub>CN as solvent. The UAKS model was applied for the molecular cavity and dispersion, cavitation, and repulsion terms were taken into account. The entropic term in CH<sub>3</sub>CN solution ( $S_s$ ) was calculated according to the procedure described by Wertz<sup>S20</sup> and Cooper and Ziegler<sup>S21</sup> using eqn. 1–4:

$$\Delta S_1 = R \ln V_{m,liq}^s / V_{m,gas} \quad (1)$$

$$\Delta S_2 = R \ln V_m^o / V_{m,liq}^s \quad (2)$$

$$\alpha = [S_{liq}^{o,s} - (S_{gas}^{o,s} + \Delta S_1)] / [S_{gas}^{o,s} + \Delta S_1] \quad (3)$$

$$S_s = S_g + \Delta S_{sol} = S_g + [\Delta S_1 + \alpha(S_g + \Delta S_1) + \Delta S_2] = S_g + [(-12.04 \text{ cal/mol}\cdot\text{K}) - 0.233(S_g - 12.04 \text{ cal/mol}\cdot\text{K}) + 5.87 \text{ cal/mol}\cdot\text{K}] \quad (4)$$

where  $S_g$  is the gas-phase entropy of solute,  $\Delta S_{sol}$  is the solvation entropy,  $S^{o,s}_{liq}$ ,  $S^{o,s}_{gas}$  and  $V_{m,liq}^s$  are the standard entropies and molar volume of the solvent in the liquid or gas phases (149.6 and 245.5 J/mol•K and 52.16 mL/mol, respectively, for CH<sub>3</sub>CN),  $V_{m,gas}$  is the molar volume of the ideal gas at 25 °C (24450 mL/mol),  $V_m^o$  is the molar volume of the solution that correspond to the standard conditions (1000 mL/mol). The enthalpies and Gibbs free energies in solution ( $H_s$  and  $G_s$ , respectively) were estimated using the expressions 5 and 6

$$H_s = E_s(6-311+G^{**}) + H_g(6-31G^*) - E_g(6-31G^*) \quad (5)$$

$$G_s = H_s - TS_s \quad (6)$$

where  $E_s$  and  $E_g$  are the total energies in solution and the gas phase and  $H_g$  is the gas-phase enthalpy calculated at the corresponding level. In this work, energies are discussed in terms of Gibbs free energies in solution.

### Estimate of rate constants of cyclohexane and cyclohexanol oxidation

Oxidation of cyclohexane was considered a two-step irreversible reaction (rate constants  $k_1$  and  $k_2$ ):

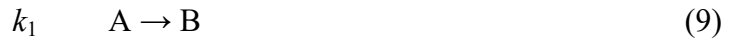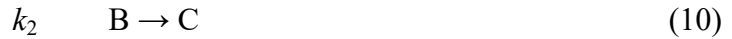

where A is cyclohexane, B is cyclohexanol and C is cyclohexanone. Analytical expressions<sup>S22</sup> describing this process have the following form:

$$B(t) = \frac{A_0 k_1 (e^{-k_1 t} - e^{-k_2 t})}{k_2 - k_1} \quad (11)$$

$$C(t) = A_0 \left( 1 - \frac{k_2 e^{-k_1 t}}{k_2 - k_1} - \frac{k_1 e^{-k_2 t}}{k_1 - k_2} \right) \quad (12)$$

where  $B(t)$  and  $C(t)$  are concentrations of cyclohexanol and cyclohexanone after reaction time  $t$  and  $A_0$  is the initial concentration of cyclohexane. Equations (11) and (12) were used to fit the experimental data in the quasi-stationary region  $t = 0 \dots n$  min, where dependence  $B(t) + C(t)$  on  $t$  is linear.

Under the conditions of experiment, cyclohexanol quantitatively oxidizes to cyclohexanone with selectivity close to 100%. Hence, the following expressions were applied simultaneously to fit the whole range experimental data when using cyclohexanol as a substrate ( $B$  and  $C$  have the same meaning as above):

$$B(t) = A_0 e^{-kt} \quad (13)$$

$$C(t) = A_0 - A_0 e^{-kt} \quad (14)$$





## Experiments with $^{18}\text{O}_2$ and $\text{H}_2^{18}\text{O}$ and under inert conditions

In the experiments under  $^{16}\text{O}_2$ ,  $^{18}\text{O}_2$  or  $\text{N}_2$  atmosphere, the catalytic reaction mixtures freshly prepared in Schlenk flask (at room temperature) were frozen with liquid nitrogen, the gas atmosphere was pumped and filled with  $\text{N}_2$  a few times in order to remove air. The frozen mixtures were left to warm up in vacuum until becoming liquid and the above procedure was repeated. Then the frozen mixtures were pumped again, the vacuum pump was turned off, and the Schlenk flasks were filled with the desired gas ( $^{16}\text{O}_2$ ,  $^{18}\text{O}_2$  or  $\text{N}_2$ ) using a syringe through a septum and heated up to  $50\text{ }^\circ\text{C}$  with a possibility of gas escape to compensate excessive pressure. In the experiments with  $\text{H}_2^{18}\text{O}$ , a reduced reaction volume was used (2.5 mL) and labeled water was added prior to the addition of the oxidant (*m*-CPBA).

The  $^{16}\text{O}/^{18}\text{O}$  oxygenated products were determined by the relative abundances of mass peaks at  $m/z = 57/59$  for cyclohexanol,  $61/63$  for deuterated cyclohexanol (see below for details) and at  $m/z = M^+/M^+ + 2$  molecular ion peaks for other compounds. The MS data for 130  $m/z$  molecular ion peaks of weakly  $^{18}\text{O}$ -enriched tertiary alcohols were corrected as described earlier.<sup>S23</sup> The H/D compositions of chlorobenzene were determined by the relative abundances of mass peaks at  $m/z = 112/113$ . The isotopic enrichment (*IE*) was calculated by considering the natural ratio *R* of the normal (*A*) and enriched (*B*)  $m/z$  peaks ( $R = B / A$ ):

$$IE(\%) = \frac{B - AR}{B + A(1 - R)} \times 100 \quad (15)$$

## Blank tests: checking of a non-catalytic *m*-CPBA activity

There are indications that *m*-CPBA may selectively oxidize tertiary C–H bonds of organic substrates via a metal-free radical mechanism,<sup>S24-26</sup> including hydroxylation of dimethylcyclohexanes and decahydronaphthalenes with a RC index of 50 – 90%.<sup>S27</sup> High loadings of oxidant and substrate ( $[m\text{-CPBA}]_0$  and  $[\text{alkane}]_0 > 1\text{ M}$ ) were used, along with elevated temperatures (ca.  $50\text{ }^\circ\text{C}$ ) and long reaction time (6 – 24 h). Also, high amounts of chlorobenzene were typically formed.<sup>S24, 25, 27</sup> We attempted to reproduce these results reacting 1 M *cis*-decahydronaphthalene (which is less volatile than *cis*-1,2-DMCH) with 1 M of *m*-CPBA in  $\text{CH}_3\text{CN}$  or  $\text{CHCl}_3$  at  $50\text{ }^\circ\text{C}$ . After 3 h reaction time the *cis/trans* ratios of tertiary alcohols formed were 1.3 and 6.2 for  $\text{CH}_3\text{CN}$  and  $\text{CHCl}_3$ , respectively. Probes taken after 24 h revealed *cis/trans* ratios of 2.6 and 6.3, respectively. Observed amounts of chlorobenzene, as a reaction product, were comparable to that for tertiary alcohols. Hence, although some stereoselectivity can be observed using non-catalytic hydroxylation with *m*-CPBA, the stereopurity of the alcohols formed is low. If the reaction is performed under conditions of our experiment (Entry 7, Table 1), only traces of tertiary alcohols are seen in the course of *cis*-1,2-DMCH oxidation, with a *cis/trans* ratio nearly 1 : 1.

## Calculation of $^{18}\text{O}$ incorporation levels into normal and deuterated cyclohexanols

The mass-spectra of normal and deuterated cyclohexanols are depicted at Figure S2. The molecular ions of these compounds (100 and 111  $m/z$ , respectively) are too weak for reliable determination of their  $^{18}\text{O}/^{16}\text{O}$  compositions when the incorporation of  $^{18}\text{O}$  is relatively low. Thus, this isotopic composition for  $\text{C}_6\text{H}_{11}\text{-OH}$  is determined by the ratio of 59/57  $m/z$  peaks, corresponding to the oxygen-containing species  $\text{C}_3\text{H}_4=^{18}\text{OH}^+$  /  $\text{C}_3\text{H}_4=^{16}\text{OH}^+$ .<sup>S28, 29</sup> Intensities of these signal are sufficient even for species labeled at level of few percent, while the 102  $m/z$  peak ( $M + 2$  labeled molecular ion) is not seen under such conditions (Figure S2). The  $^{18}\text{O}/^{16}\text{O}$  composition of deuterated cyclohexanol,  $\text{C}_6\text{D}_{11}\text{-OH}$ , can be determined from the ratio of 63/61  $m/z$  peaks ( $\text{C}_3\text{D}_4=^{18}\text{OH}^+$  /  $\text{C}_3\text{D}_4=^{16}\text{OH}^+$  ratio). However, the respective peak at 63  $m/z$  ( $\text{C}_3\text{D}_4=^{18}\text{OH}^+$ ) already has high intensity, being probably overlapped with some other fragmentation products.

The 59/57 and 63/61 natural ratios were estimated as 0.0093(5) and 0.119(6) from 20 and 12 measurements, respectively (Figure S3). These natural ratios were accounted during the calculations of  $^{18}\text{O}/^{16}\text{O}$  compositions of normal and labeled cyclohexanols (eqn. (3)).

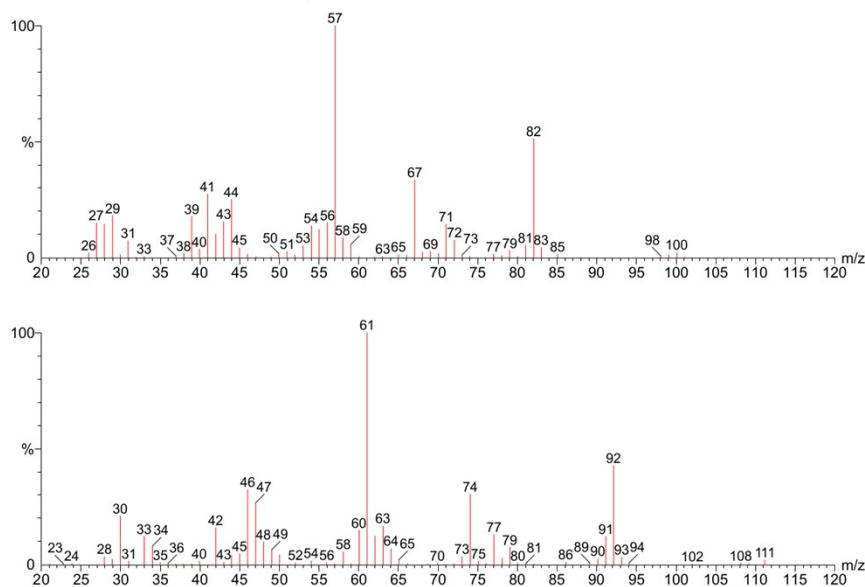

**Figure S2.** EI mass spectra of  $\text{C}_6\text{H}_{11}\text{-OH}$  (top) and  $\text{C}_6\text{D}_{11}\text{-OH}$  (bottom), both enriched with 4.5% of  $^{18}\text{O}$ .

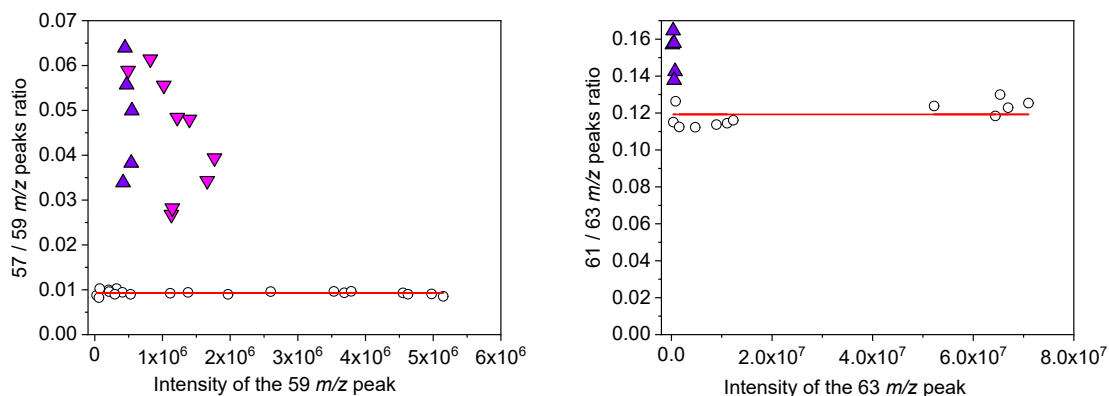

**Figure S3.** Changes of the mass spectra upon  $^{18}\text{O}$ -incorporation into cyclohexanols. Left: empty circles and solid red line show the dependence of 59/57  $m/z$  intensities ratio on the 59  $m/z$  peak intensity for non-labeled cyclohexanol. Top- ( $\Delta$ ) and bottom- ( $\nabla$ ) oriented triangles show the 59/57  $m/z$  intensities ratios for the oxidation of  $\text{C}_6\text{H}_{12}$  and  $\text{C}_6\text{H}_{12}/\text{C}_6\text{D}_{12}$  mixture in the presence of  $\text{H}_2^{18}\text{O}$ , respectively. Right: the same dependence for 63/61  $m/z$  ratio observed for  $\text{C}_6\text{D}_{11}\text{-OH}$ . Top-oriented triangles show the 63/61  $m/z$  ratio for oxidation of  $\text{C}_6\text{H}_{12}/\text{C}_6\text{D}_{12}$  mixture in the presence of  $\text{H}_2^{18}\text{O}$ .

### Estimate of D incorporation levels into chlorobenzene

The typical mass spectra of normal and deuterated chlorobenzene are depicted in the Figure S4. Statistical distribution of the 113/112  $m/z$  peaks for normal chlorobenzene gave the ratio of 0.06(1). Deviations from this ratio, exhibited by D-enriched species, are shown in the Figure S5.

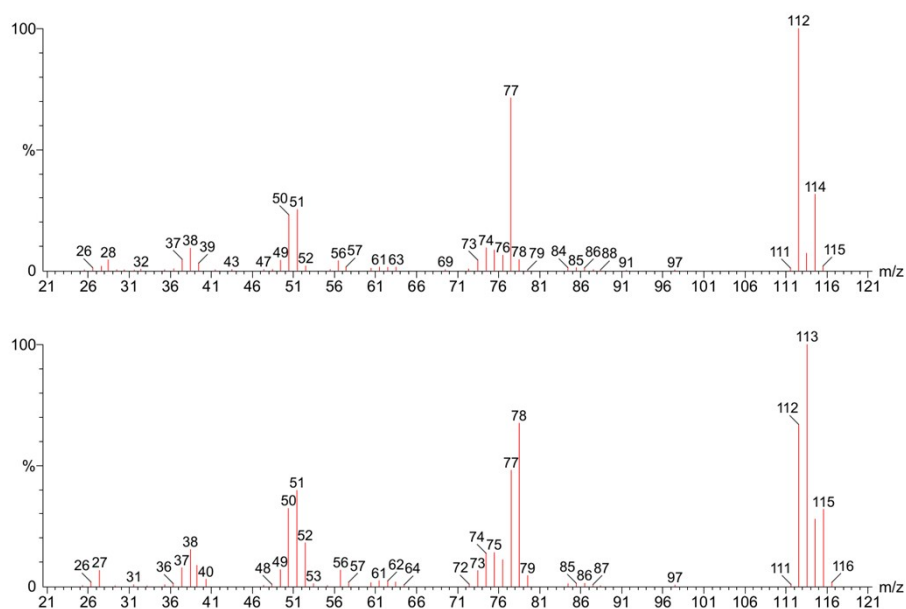

**Figure S4.** EI mass spectra of normal (top) and deuterated chlorobenzene (bottom, 59% of D-enrichment).

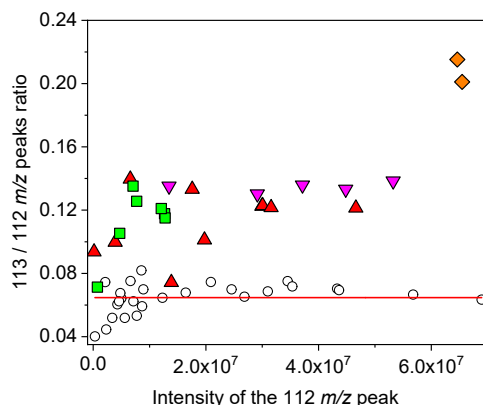

**Figure S5.** Changes of the mass spectra upon D-incorporation into chlorobenzene. Empty circles and solid red line show the data for non-labeled cyclohexanol. Squares ( $\square$ ), top- ( $\triangle$ ) and bottom- ( $\nabla$ ) oriented triangles show the ratios for oxidation of 0.1 M of methylcyclohexane, while rhombs ( $\diamond$ ) correspond to its 0.2 M concentration.

### Oxygen exchange between water and tertiary 1,2-dimethylcyclohexane-1-oles and other alcohols in the presence of nitric acid and pre-catalyst 1

The possibility of a direct oxygen exchange between tertiary alcohols and water, under the conditions of experiment, was studied in the following way. The typical catalytic reaction system (Entry 5, Table 1) was initiated and stirred for 24 h at 50 °C to ensure complete consumption of *m*-CPBA. Then  $\text{H}_2^{18}\text{O}$  was added dropwise (the final concentration was 0.5 M) and the mixture was stirred further. The aliquots were taken before addition of  $\text{H}_2^{18}\text{O}$ , after 1 h and 24 h. The observed 130/128 *m/z* ratios are depicted at Figure S6. The mass spectra of normal and partially labeled tertiary alcohols are shown in Figures S7–9. No incorporation of  $^{18}\text{O}$  into the tertiary alcohols was observed after 1 h of stirring. After 24 h of stirring the *cis*-alcohol was found to contain 0.8% of labeled oxygen, while the *trans*-alcohol accumulated higher level of 21%.

A series of alcohols was tested for oxygen exchange using simplified conditions (stirring of 0.05 M acetonitrile solution of alcohol, in the presence of 0.005 M of  $\text{HNO}_3$ , with 0.5 M of  $\text{H}_2^{18}\text{O}$  at 50 °C). No oxygen exchange (after 24 h) was observed for cyclohexanol, 2,6-dimethylcyclohexanol, cycloheptanol, cyclooctanol and triphenylmethanol. Cumyl alcohol (2-phenyl-2-propanol) exhibited strong and fast exchange, leading to >50%  $^{18}\text{O}$  enrichment after 1 h; 2,3-dimethyl-2-butanol revealed slow exchange, showing *ca.* 1% of  $^{18}\text{O}$ -labeling after 1 h of treatment and 12% after 24 h. The  $^{18}\text{O}$  labeling of 1-indanol was found to be >90% after 1 h of time.

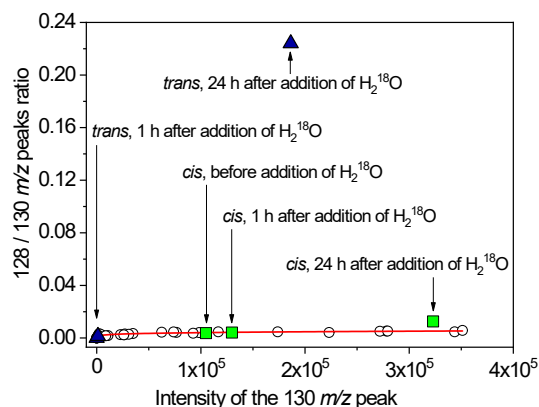

**Figure S6.** EI mass spectra (Figures S7-S9), shown as a dependence of 130/128  $m/z$  peaks ratio on the intensity of 130  $m/z$  peak. Empty circles and solid red line: dependence of 130/128  $m/z$  intensities ratio on the 130  $m/z$  peak intensity for non-labeled tertiary 1,2-DMCH alcohols. Green squares ( $\square$ ) and dark blue triangles ( $\Delta$ ) show the 130/128  $m/z$  intensities ratios for tertiary *cis*- and *trans*-alcohol in the test for oxygen exchange with  $\text{H}_2^{18}\text{O}$  under non-catalytic conditions.

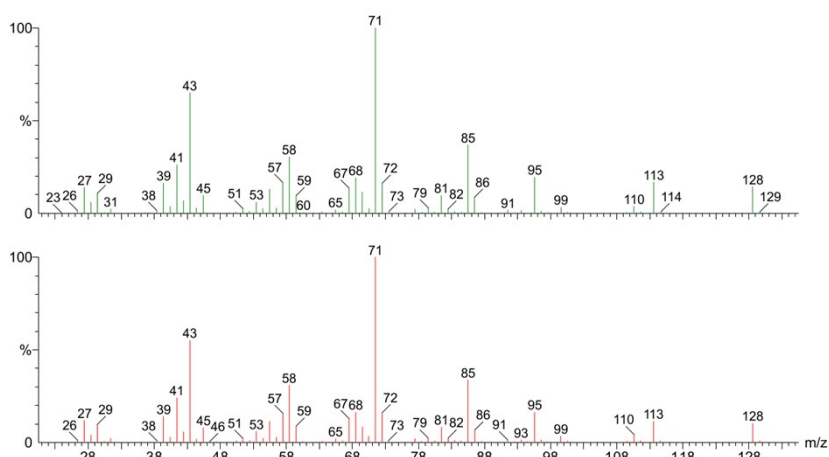

**Figure S7.** EI mass spectra of the non-labeled tertiary *trans*- (top) and *cis*- (bottom) tertiary alcohols (aliquots taken before addition of  $\text{H}_2^{18}\text{O}$ ).

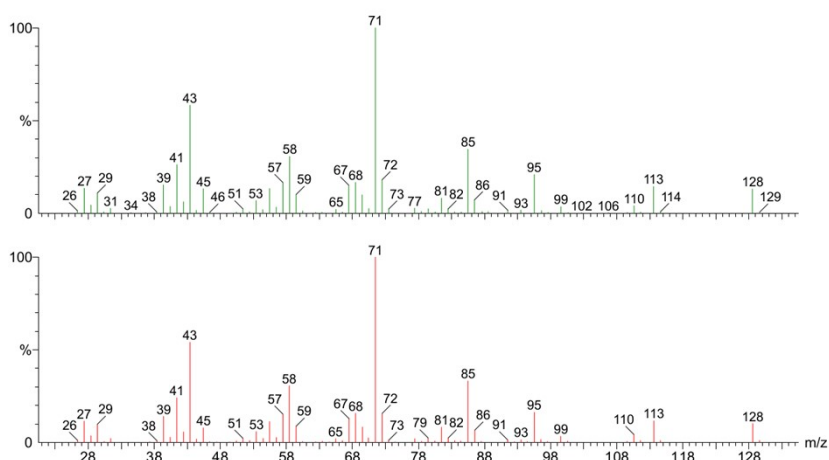

**Figure S8.** EI mass spectra of the tertiary *trans*- (top) and *cis*- (bottom) alcohols, measured 1 h after addition of  $\text{H}_2^{18}\text{O}$ .

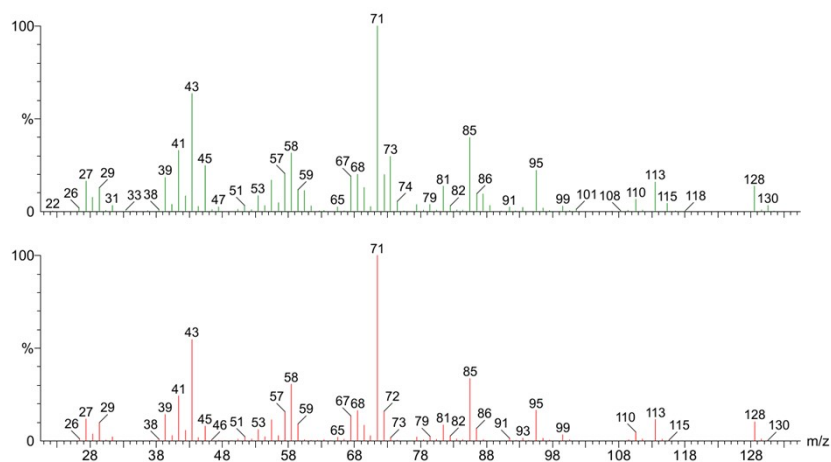

**Figure S9.** EI mass spectra of the tertiary *trans*- (top) and *cis*- (bottom) alcohols, measured 24 h after addition of  $\text{H}_2^{18}\text{O}$ .

### Incorporation of $^{18}\text{O}$ from $\text{H}_2^{18}\text{O}$ in the course of a catalyst-free oxidation

The Entry 7 (Table 1) reveals the possibility of a catalyst-free oxidation of *cis*-1,2-DMCH with *m*-CPBA, although with very low yields and selectivity. The same test performed in the presence of 0.5 M of  $\text{H}_2^{18}\text{O}$  suggested the incorporation of  $^{18}\text{O}$  into the tertiary alcohols, but too weak intensities of the 128 and 130  $m/z$  signals did not allow reliable determination of  $^{18}\text{O}$  levels. When the concentrations of  $\text{H}_2^{18}\text{O}$  and *m*-CPBA were increased up 1.0 and 0.14 M (all other conditions as in Entry 7) the pronounced incorporation of  $^{18}\text{O}$  into tertiary *cis*-alcohol of 6.2% after 6 h was observed (Figure S10). In the case of tertiary *trans*-alcohol the 130  $m/z$  signals were too weak for reliable determination of the  $^{18}\text{O}$  levels. The chromatograms recorded before and after addition of solid  $\text{PPh}_3$  to aliquots show difference in *c/t* ratios as well as in the chlorobenzene yield (Figure S11).

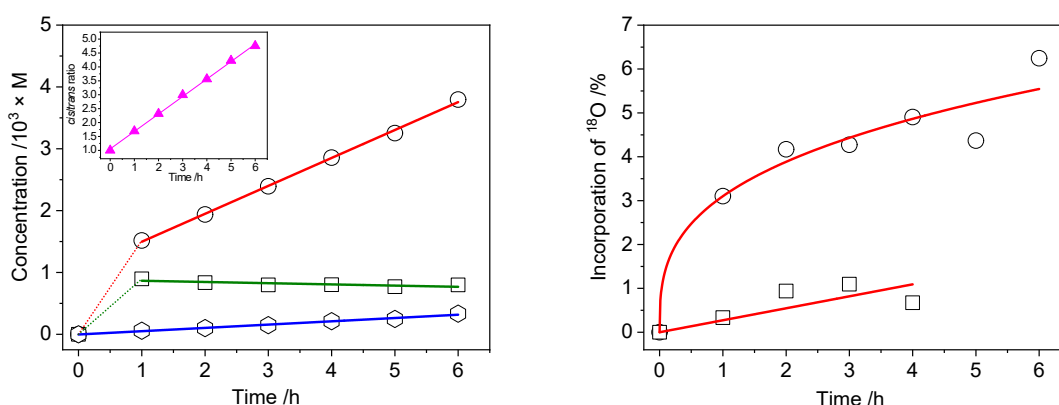

**Figure S10.** Left: accumulations of the *cis*- (○) and *trans*- (□) tertiary alcohols and chlorobenzene (◇) in the course of *cis*-1,2-DMCH (0.1 M) oxidation with *m*-CPBA (0.14 M) in the presence of  $\text{HNO}_3$  ( $5.5 \times 10^{-3}$  M) and  $\text{H}_2^{18}\text{O}$  (1 M) and absence of the metal catalyst, at 50 °C in acetonitrile. Inset shows the growth of *cis/trans* ratio with the time. Right: incorporations of  $^{18}\text{O}$  into tertiary *cis*-alcohol from  $\text{H}_2^{18}\text{O}$  for the reaction conducted in the presence (○) or absence (□) of nitric acid promoter.

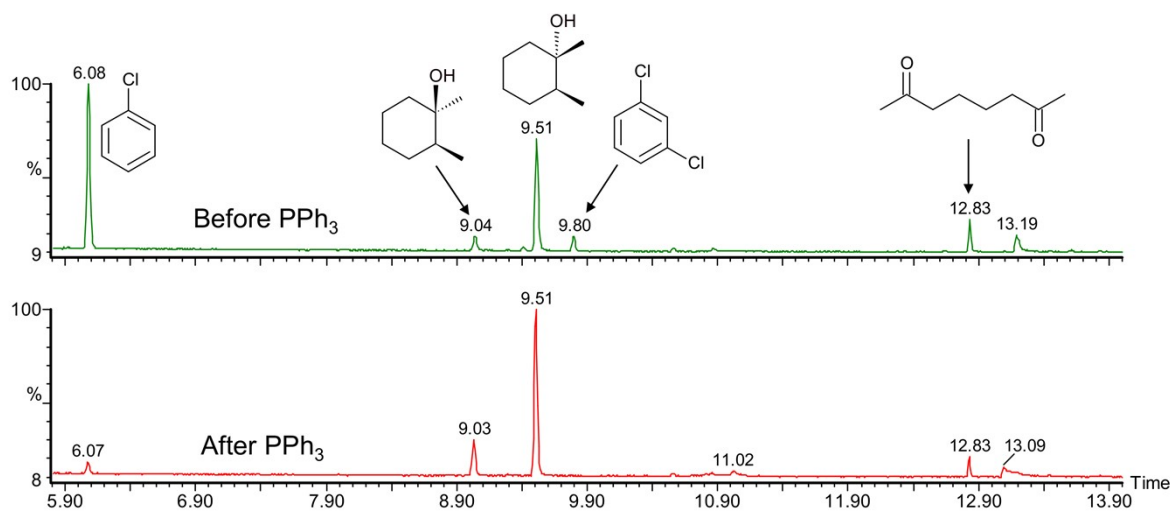

**Figure S11.** Fragments of the chromatograms showing the main reaction products from the catalyst-free oxidation of *cis*-1,2-DMCH (conditions are as those in Figure S10 caption) recorded at 5 h before (top) and after (bottom) addition of  $\text{PPh}_3$ . 6.08 min: chlorobenzene; 9.04 min: tertiary *trans*-alcohol; 9.51 min: tertiary *trans*-alcohol; 9.80 min: 1,3-dichlorobenzene; 12.83 min: 2,7-octanedione; 13.19 min (only before  $\text{PPh}_3$ ): 1,3-dichlorophenol.

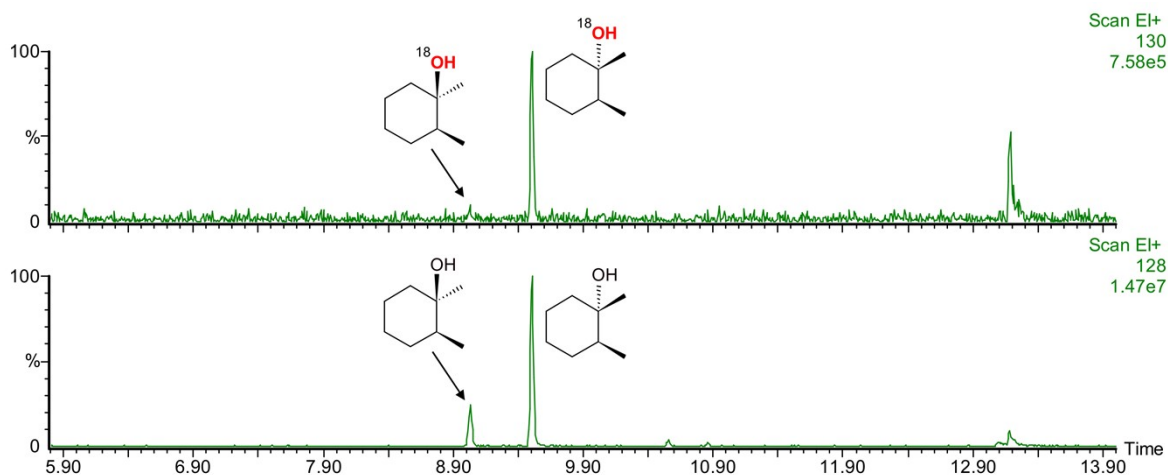

**Figure S12.** Fragments of the chromatograms showing the intensities of the signals 128 and 130  $m/z$ , corresponding to normal and labeled tertiary alcohols in the course of the catalyst-free oxidation of *cis*-1,2-DMCH (Figure S10). Under these conditions, the expected intensity of the 130  $m/z$  signal for non-labeled tertiary *cis*-alcohol is ca.  $7 \times 10^4$ .



### Estimate of $^{18}\text{O}$ levels in the course of *cis*-1,2-DMCH oxidation under $^{18}\text{O}_2$ or in the presence of $\text{H}_2^{18}\text{O}$

The observed levels of  $^{18}\text{O}$  incorporations for tertiary *trans*- and *cis*-alcohols are depicted at Figure S13. As can be seen, in the case of  $^{18}\text{O}_2$  test (Figure S13, left) the 130/128 *m/z* ratios of *cis*-alcohol are close to those expected for non-labeled species, while *trans*-alcohol shows more than 100 fold increase. Although 130/128 *m/z* ratios for *trans*-alcohol suggested the presence of  $^{18}\text{O}$  (Figure S13, right, blue squares), the absolute intensity of the respective 130 *m/z* signals were very low (lower than  $10^4$ ), thus falling into the non-reliable region.<sup>S23</sup>

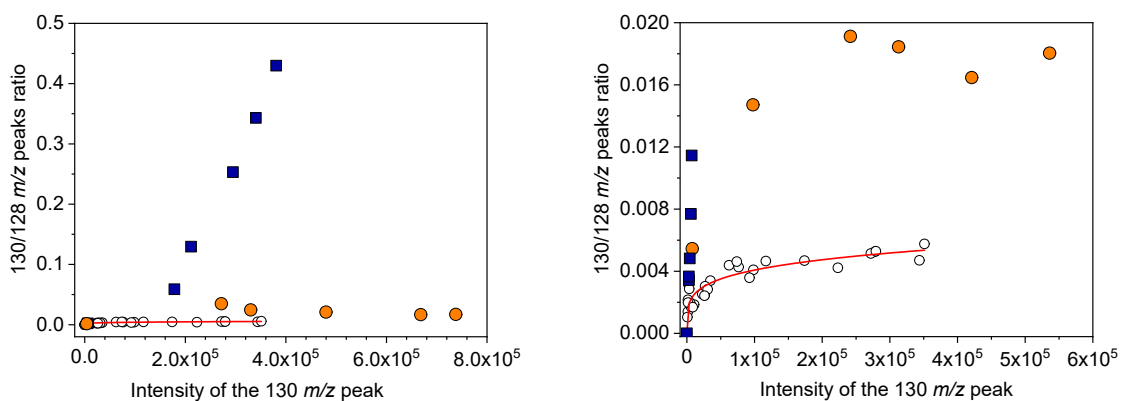

**Figure S13.** Dependence of 130/128 *m/z* intensities ratios on the 130 *m/z* peak intensities for non-labeled tertiary 1,2-DMCH alcohols (empty circles and red line), and labeled *trans*- (blue squares) and *cis*- (orange circles) alcohols in the course of reaction under  $^{18}\text{O}_2$  (left) and in the presence of  $\text{H}_2^{18}\text{O}$  (right).

## Oxidation of cyclohexane in the presence of H<sub>2</sub><sup>18</sup>O and oxidation of cyclohexanol

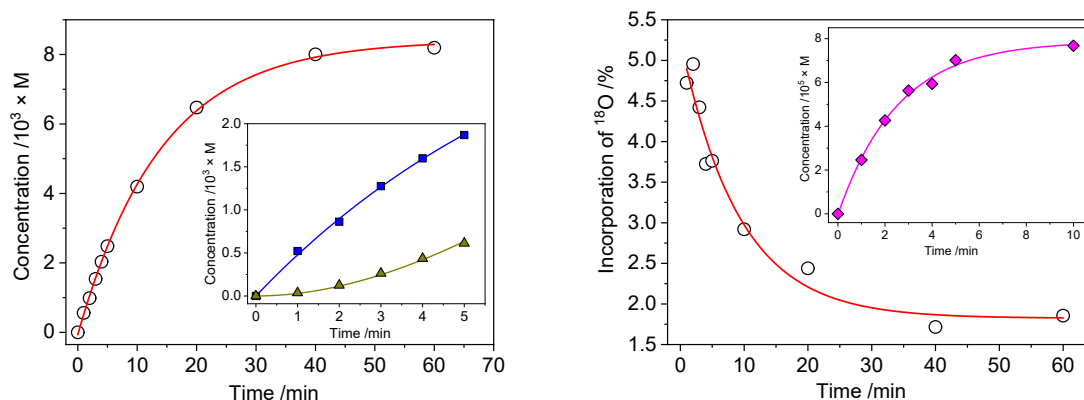

**Figure S14.** Left: accumulation of the products (sum of cyclohexanol and cyclohexanone) with time in the course of cyclohexane (0.1 M) oxidation with *m*-CPBA (0.027 M) catalyzed by **1** ( $[\mathbf{1}]_0 = 1.1 \times 10^{-5} \text{ M}$ ) in the presence of HNO<sub>3</sub> ( $5.5 \times 10^{-3} \text{ M}$ ) and H<sub>2</sub><sup>18</sup>O (0.5 M) in acetonitrile at 50 °C. Inset shows accumulations of particular products, cyclohexanol (□) and cyclohexanone (△). The fit (solid lines) was obtained using the equations 11 and 12 with  $k_1 = 8.47 \times 10^{-5}$  and  $k_2 = 2.03 \times 10^{-3} \text{ s}^{-1}$ . Right: incorporation of <sup>18</sup>O into cyclohexanol in the same reaction shown as a function of time. Inset shows accumulation of <sup>18</sup>O-enriched cyclohexanol with time.

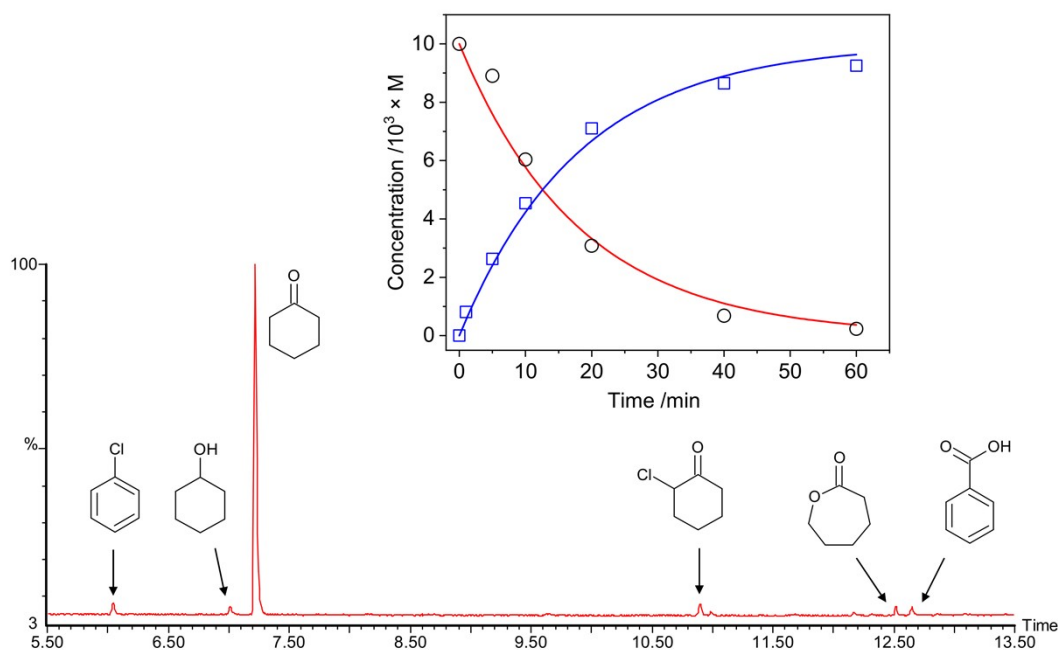

**Figure S15.** Fragment of the chromatogram showing the main reaction products in the course of cyclohexanol (0.01 M) oxidation with *m*-CPBA (0.027 M) catalyzed by **1** ( $[\mathbf{1}]_0 = 1.1 \times 10^{-5} \text{ M}$ ) in the presence of HNO<sub>3</sub> ( $5.5 \times 10^{-3} \text{ M}$ ) in acetonitrile at 50 °C, 1 h. Inset shows consumption of cyclohexanol (○) and accumulation of cyclohexanone (□). The fit (solid lines) gave  $k = 9.2 \times 10^{-4} \text{ s}^{-1}$ .

## Kinetic isotope effect and D-labeled species

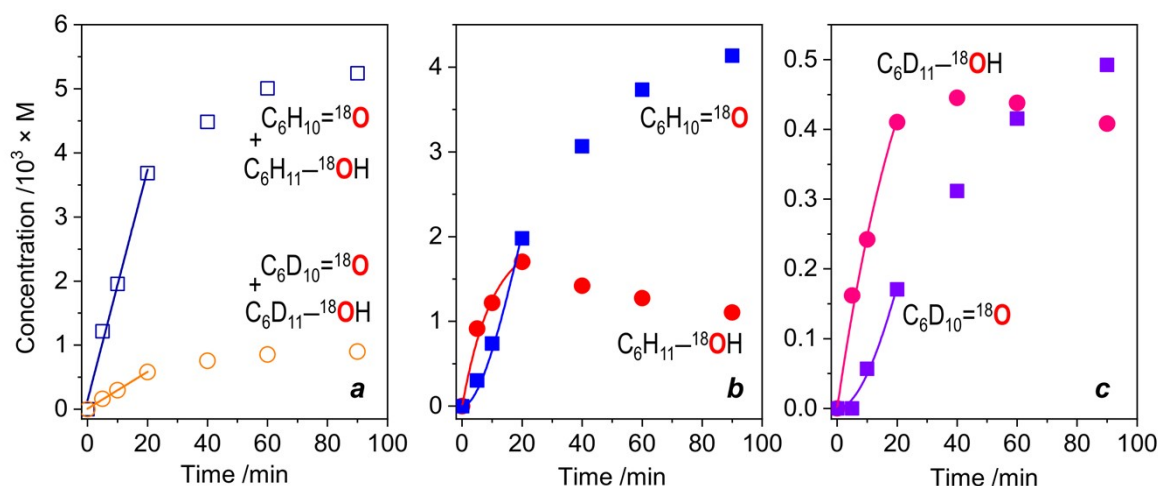

**Figure S16.** Accumulations of products (normal and deuterated cyclohexanol and cyclohexanone) in the course of oxidation of equimolar mixture of  $C_6H_{12}$  and  $C_6D_{12}$  (0.05 each) with *m*-CPBA (0.027 M) catalyzed by **1** ( $[1]_{Co} = 1.1 \times 10^{-5}$  M) in the presence of  $HNO_3$  ( $5.5 \times 10^{-3}$  M) in acetonitrile at  $50^\circ C$ .

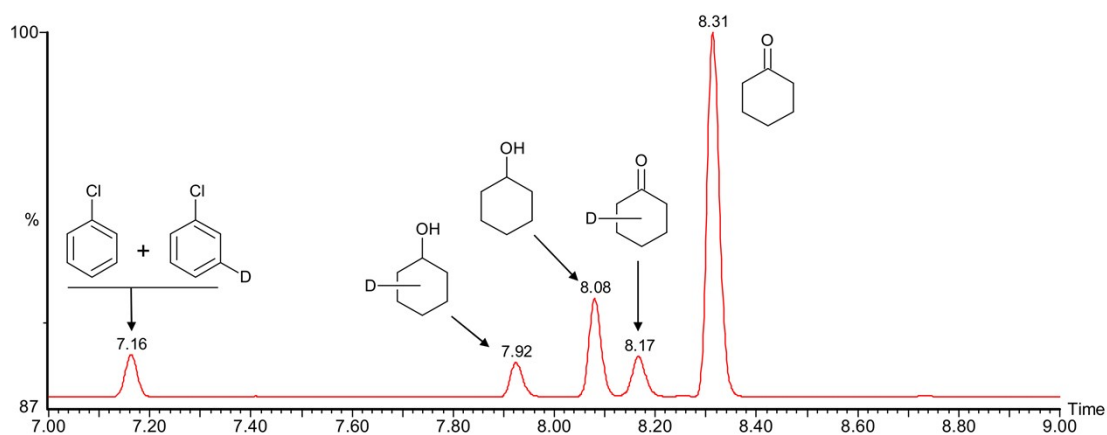

**Figure S17.** Fragment of the chromatogram showing the main reaction products in the course of competitive oxidation of equimolar mixture of normal and deuterated cyclohexane (conditions are stated in Figure S16 caption) after 90 min.

**Table S1.** Rate constants calculated for oxidation of normal and deuterated cyclohexane.

| $k, s^{-1}$                  | Substrate             |                      |
|------------------------------|-----------------------|----------------------|
|                              | $C_6H_{12}$           | $C_6D_{12}$          |
| $k_1, CyH \rightarrow CyOH$  | $6.5 \times 10^{-5}$  | $9.9 \times 10^{-6}$ |
| $k_2, CyOH \rightarrow Cy=O$ | $15.1 \times 10^{-4}$ | $6.2 \times 10^{-4}$ |
| $k_2 / k_1$                  | 23                    | 63                   |

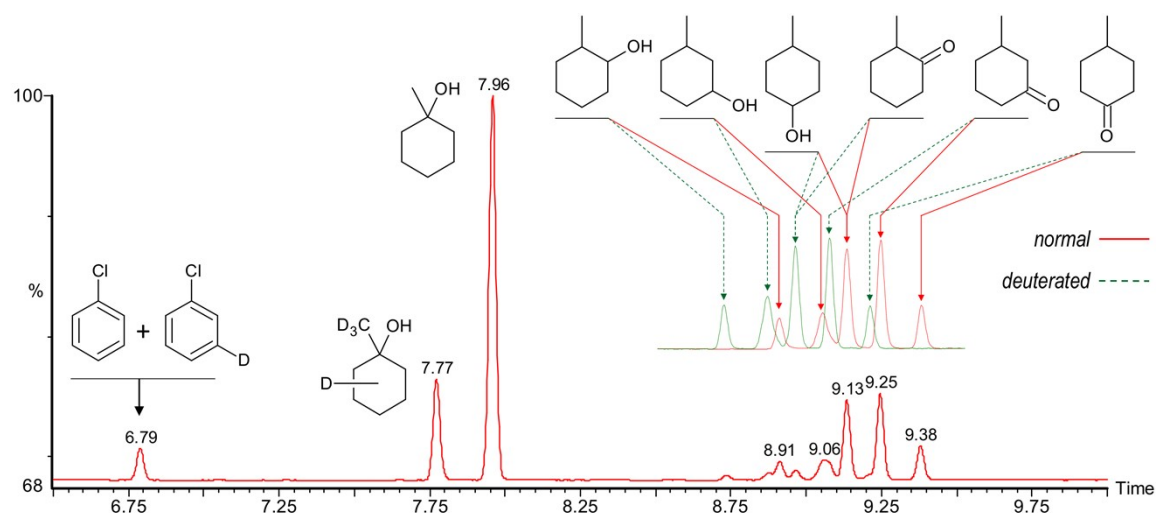

**Figure S18.** Fragment of the chromatogram showing the main reaction products in the course of competitive oxidation of equimolar mixture of normal and deuterated methylcyclohexane (0.05 each) with *m*-CPBA (0.027 M) catalyzed by **1** ( $[1_{C_6}]_0 = 1.1 \times 10^{-5}$  M) in the presence of  $\text{HNO}_3$  ( $5.5 \times 10^{-3}$  M) in acetonitrile at 50 °C. Peaks of secondary alcohols and ketones overlap, resulting in a complex pattern which does not allow estimate of particular concentrations. From the intensities of 112 and 124  $m/z$  peaks, corresponding to normal and deuterated methylcyclohexanones, one could expect KIE of 7.7 for oxidation of secondary C–H bonds.

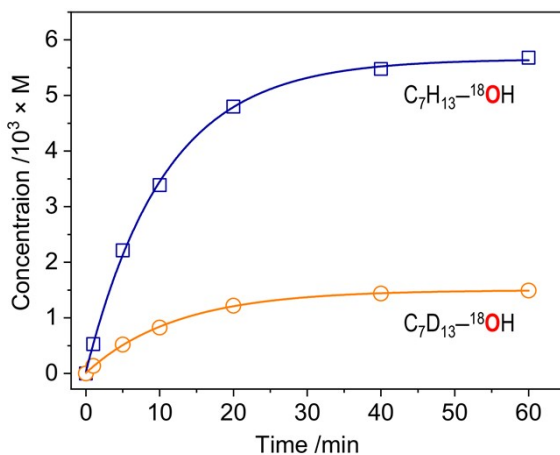

**Figure S19.** Accumulations of products (normal and deuterated tertiary methylcyclohexanols) in the course of oxidation of equimolar mixture of  $\text{C}_7\text{H}_{14}$  and  $\text{C}_7\text{D}_{14}$  (0.05 each) with *m*-CPBA (0.027 M) catalyzed by **1** ( $[1_{C_6}]_0 = 1.1 \times 10^{-5}$  M) in the presence of  $\text{HNO}_3$  ( $5.5 \times 10^{-3}$  M) in acetonitrile at 50 °C.

## Reactions at different temperatures

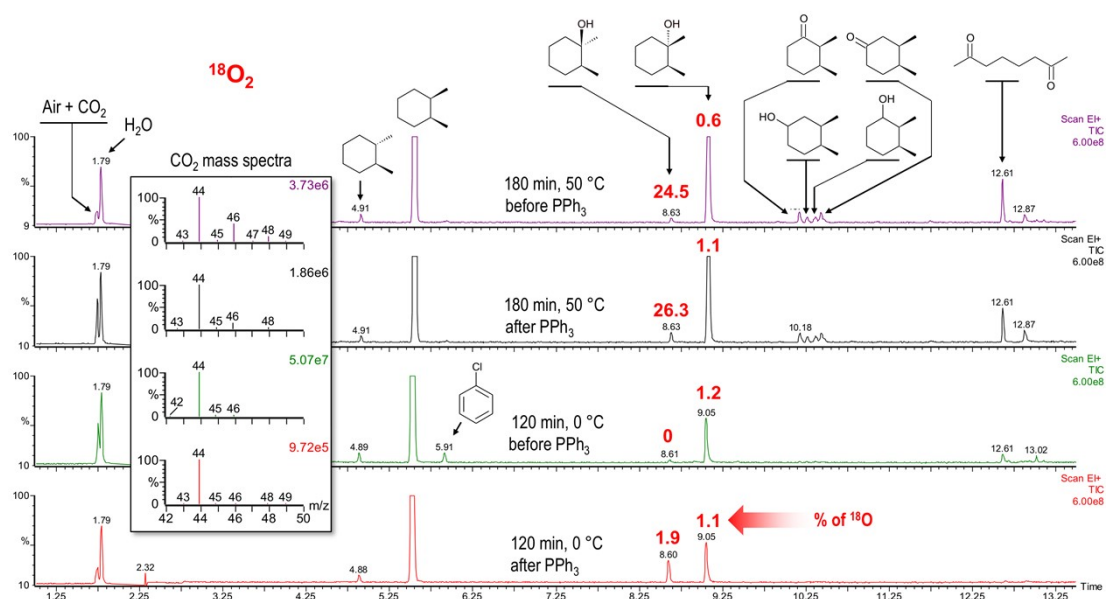

**Figure S20.** Fragments of the chromatograms showing the main reactions products, along with substrates, in the course of *cis*-1,2-DMCH (0.1 M) oxidation with *m*-CPBA (0.027 M) catalyzed by **1** ([I<sub>C6</sub>]<sub>0</sub> = 1.1 × 10<sup>-5</sup> M) in the presence of HNO<sub>3</sub> (5.5 × 10<sup>-3</sup> M) in acetonitrile under <sup>18</sup>O<sub>2</sub> atmosphere. The reaction was initiated and continued at 0 °C for the first 2 h. Then the reaction mixture was heated until 50 °C and continued at this temperature. The inset shows the EI spectra of (labeled) CO<sub>2</sub> present in the reaction solution. Analysis of the headspace atmosphere of the Schlenk tube revealed similar spectra.

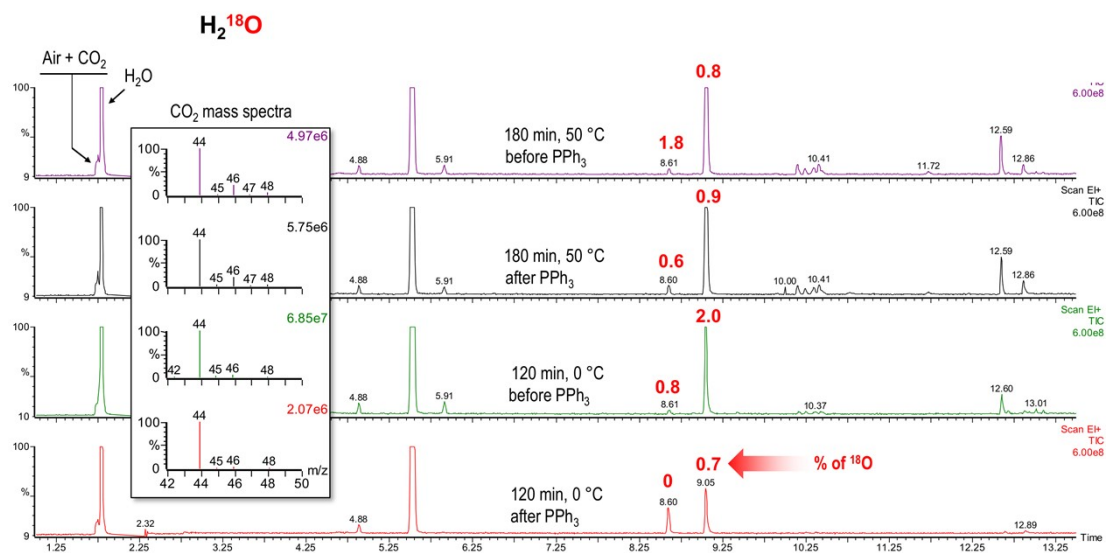

**Figure S21.** Fragments of the chromatograms showing the main reactions products, along with substrates, in the course of *cis*-1,2-DMCH (0.1 M) oxidation with *m*-CPBA (0.027 M) catalyzed by **1** ([I<sub>C6</sub>]<sub>0</sub> = 1.1 × 10<sup>-5</sup> M) in the presence of HNO<sub>3</sub> (5.5 × 10<sup>-3</sup> M) in acetonitrile in the presence of H<sub>2</sub><sup>18</sup>O (0.5 M). The reaction was initiated and continued at 0 °C for the first 2 h. Then the reaction mixture was heated until 50 °C and continued at this temperature. The inset shows the EI spectra of (labeled) CO<sub>2</sub> present in the reaction solution. Analysis of the headspace atmosphere of the Schlenk tube revealed similar spectra.

## Search for alkyl hydroperoxides

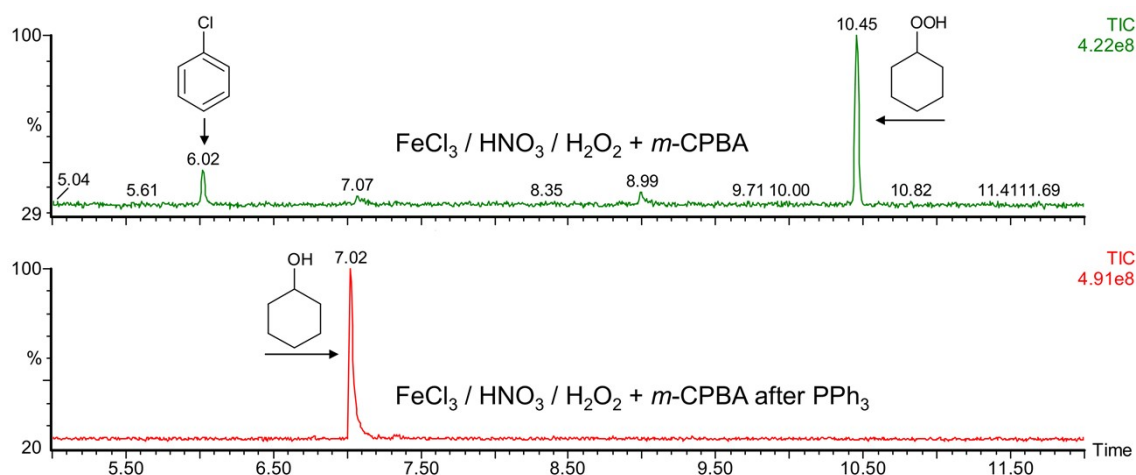

**Figure S22.** Fragments of the chromatograms (recorded before and after addition of PPh<sub>3</sub>) illustrating persistence of cyclohexyl hydroperoxide in the presence of *m*-CPBA. Cyclohexyl hydroperoxide was obtained by reacting H<sub>2</sub>O<sub>2</sub> (1 M) with cyclohexane (0.37 M) in the presence of HNO<sub>3</sub> ( $4 \times 10^{-3}$  M) and FeCl<sub>3</sub> ( $6 \times 10^{-4}$  M) as a catalyst in acetonitrile at 50 °C. After 1 h the solution of *m*-CPBA in acetonitrile was added to reach its final concentration of 0.027 M and the mixture was stirred for another 1 h before being analyzed.

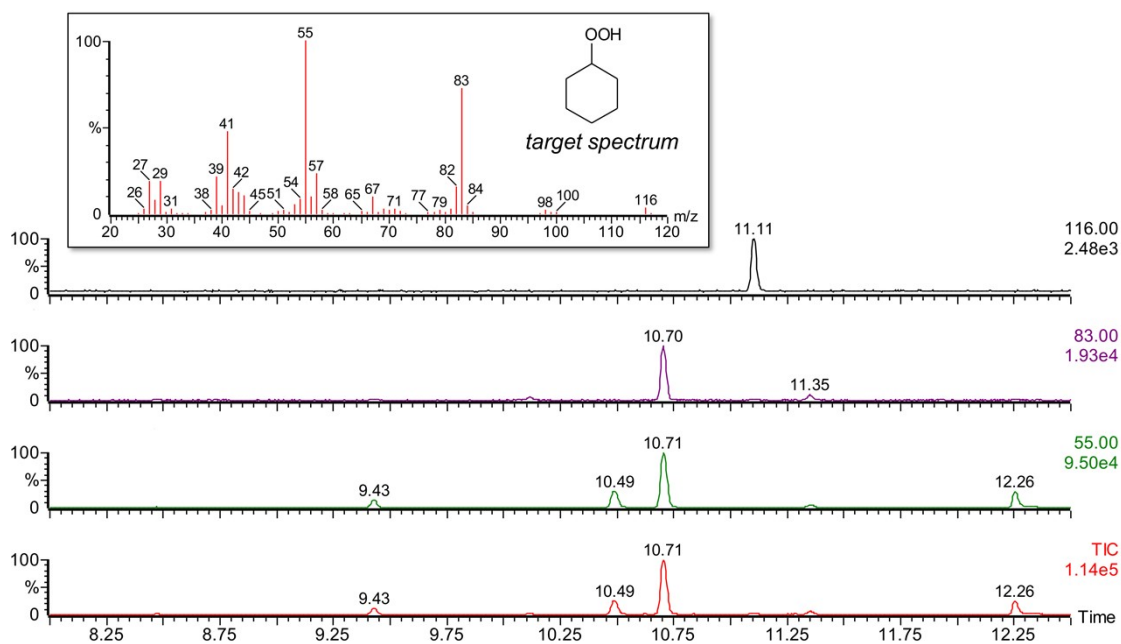

**Figure S23.** Fragments of the chromatograms showing the region where cyclohexyl hydroperoxide, CyOOH, is expected (ca. 10.5 min) in the course of cyclohexane (0.2 M) oxidation with *m*-CPBA (0.027 M) catalyzed by **1** ( $[I_{Co}]_0 = 1.1 \times 10^{-5}$  M) in the presence of HNO<sub>3</sub> ( $5.5 \times 10^{-3}$  M) in acetonitrile at 0 °C after 2 h. The full MS chromatogram is shown in bottom, while the other chromatograms demonstrate the intensities of particular *m/z* signals designated in the right. No signs for CyOOH are seen since no coinciding 55, 83 and 116 *m/z* peaks are observed.

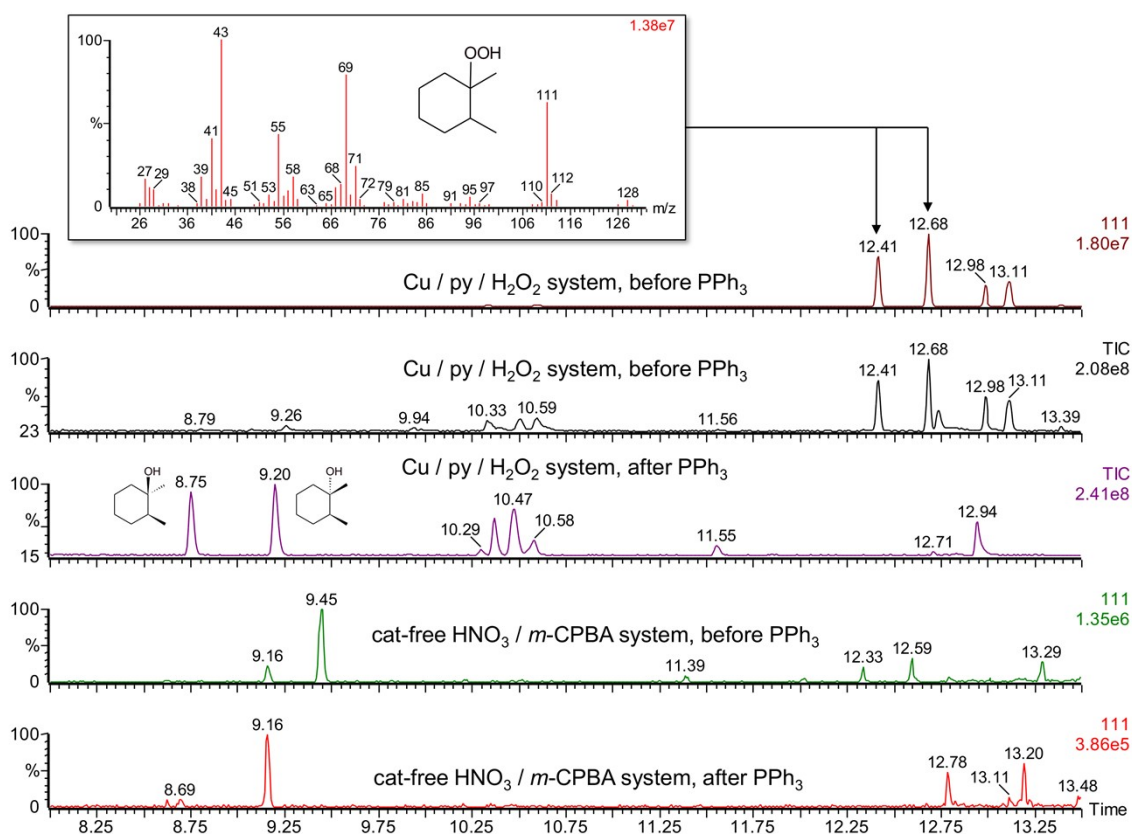

**Figure S24.** Fragments of the chromatograms showing the main reactions products in the course of *cis*-1,2-DMCH (0.1 M) oxidation with two different catalytic systems (both in acetonitrile at 50 °C): (a) [Cu(L)] / Pyridine / H<sub>2</sub>O<sub>2</sub> (where L = 2,4-methoxy-1,3,5-triazapentadiene), known to attack C–H bonds with HO• radicals and form alkyl hydroperoxides as main products,<sup>S30</sup> and (b) catalyst-free oxidation with *m*-CPBA (0.027 M) in the presence of HNO<sub>3</sub> (5.5 × 10<sup>-3</sup> M). The weak peaks at 12.3 and 12.6 min observed for (b) reveal MS spectra corresponding to tertiary alkyl hydroperoxides (see the inset).



## Stability of complex catalytic species under catalytic conditions

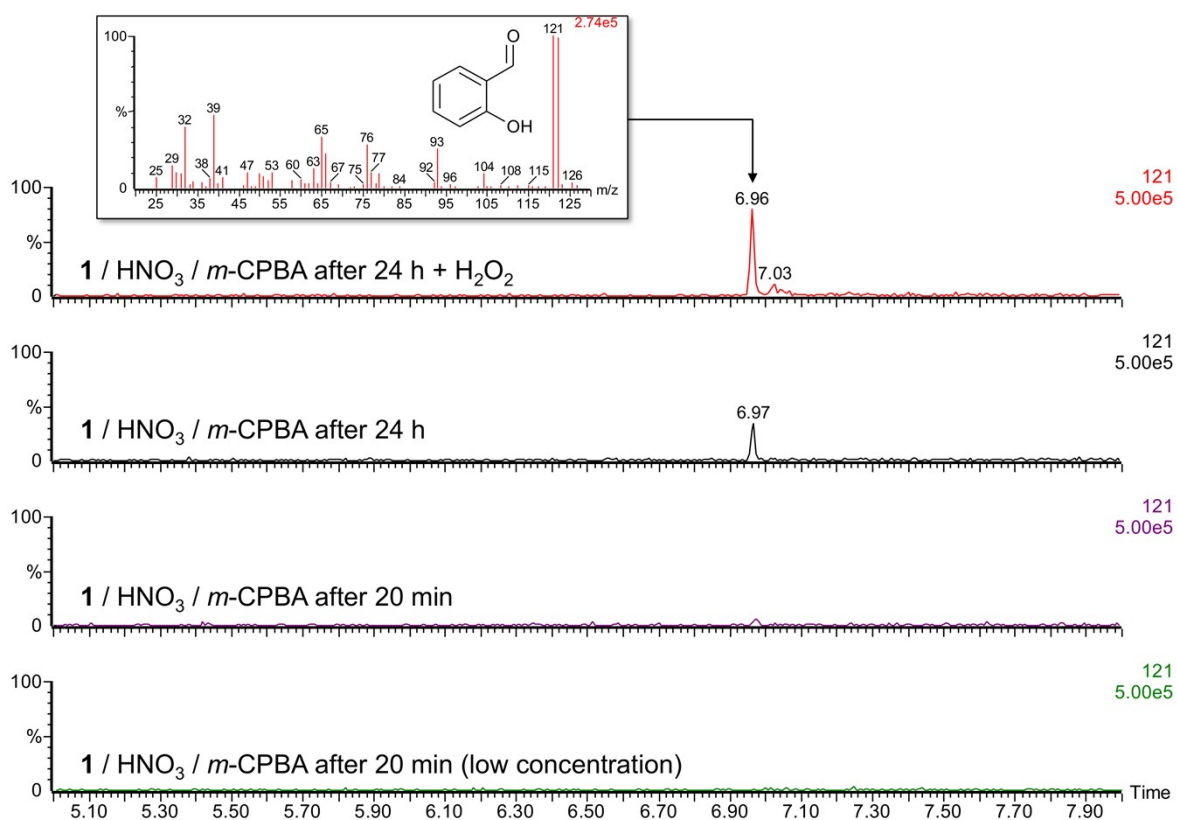

**Figure S25.** Fragments of the chromatograms showing the 121 *m/z* signal, corresponding to salicylic aldehyde (formed from the degradation of Schiff base ligand H<sub>2</sub>Sae), for [1]<sub>0</sub> = 2.7 × 10<sup>-6</sup> M and [*m*-CPBA]<sub>0</sub> = 0.027 M (bottom) and [1]<sub>0</sub> = 1 × 10<sup>-5</sup> M and [*m*-CPBA]<sub>0</sub> = 0.1 M (other chromatograms), in the presence of HNO<sub>3</sub> (5.5 × 10<sup>-3</sup> M) in acetonitrile. The peak of salicylic aldehyde becomes clearly visible only after treatment of 1 with *m*-CPBA for 24 h and enhances after addition of H<sub>2</sub>O<sub>2</sub> (1 M).



## Reaction by-products

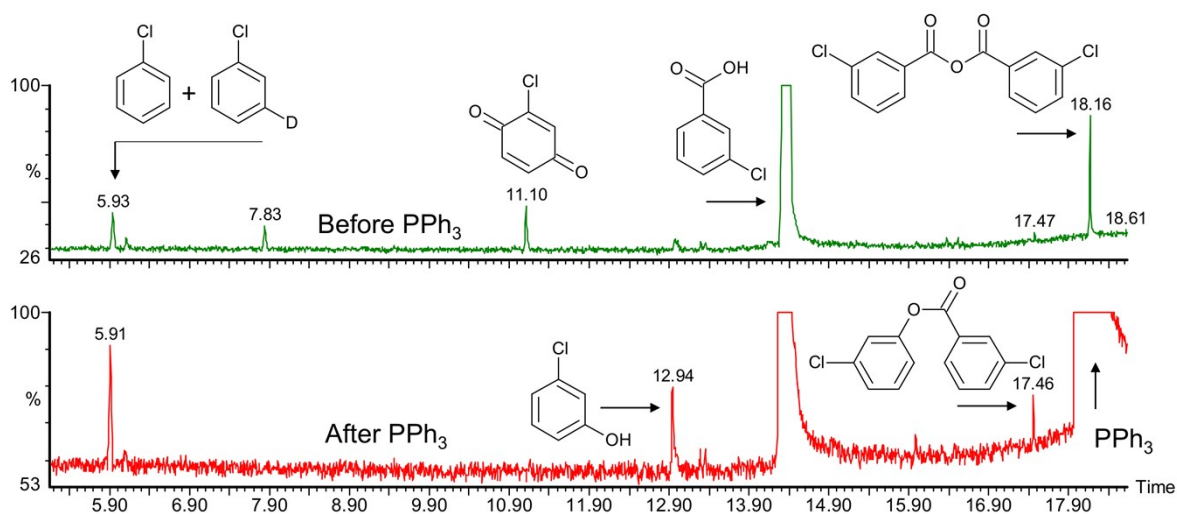

**Figure S26.** Fragments of chromatograms recorded before and after addition of PPh<sub>3</sub>, in the course of substrate-free decomposition of 0.027 M of *m*-CPBA, catalyzed by **1** ( $[I_{Co}]_0 = 1.1 \times 10^{-5}$  M) in the presence of HNO<sub>3</sub> ( $5.5 \times 10^{-3}$  M) in deuterated acetonitrile (CD<sub>3</sub>CN) at 50 °C, after 1 h.

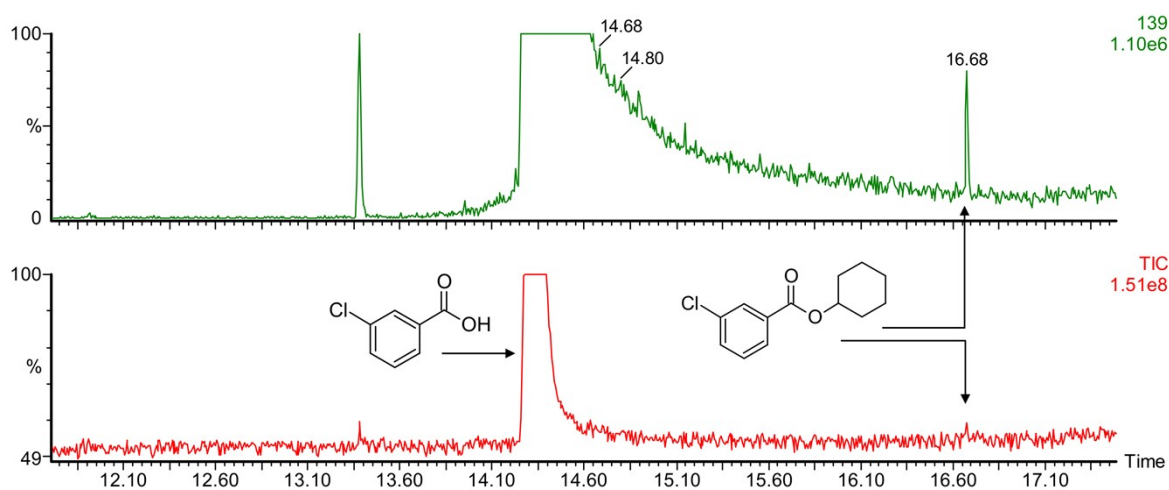

**Figure S27.** Fragments of the chromatograms showing the peak of cyclohexyl *m*-chlorobenzoate ester observed in the course of cyclohexane (0.2 M) oxidation with *m*-CPBA (0.027 M) catalyzed by **1** ( $[I_{Co}]_0 = 1.1 \times 10^{-5}$  M) in the presence of HNO<sub>3</sub> ( $5.5 \times 10^{-3}$  M) in acetonitrile at 0 °C after 2 h.

## Accumulation of $^{18}\text{O}$ -labeled $\text{OPPh}_3$ and tertiary alcohols

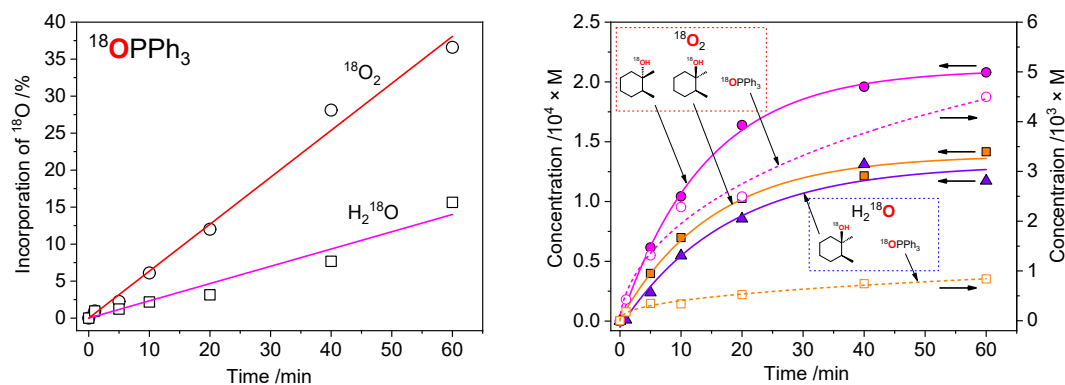

**Figure S28.** Left: incorporation of  $^{18}\text{O}$  into  $^{18}\text{OPPh}_3$ , observed after treatment of the reaction probe with  $\text{PPh}_3$  for oxidations of *cis*-1,2-DMCH under  $^{18}\text{O}_2$  or in the presence of 0.5 M  $\text{H}_2\ ^{18}\text{O}$  (conditions are as those for Entry 5, Table 1). Right: accumulations of  $^{18}\text{O}$ -labeled tertiary alcohols and  $^{18}\text{OPPh}_3$  for the same reactions.

## HF-EPR spectra of cobalt species before and after interaction with *m*-CPBA

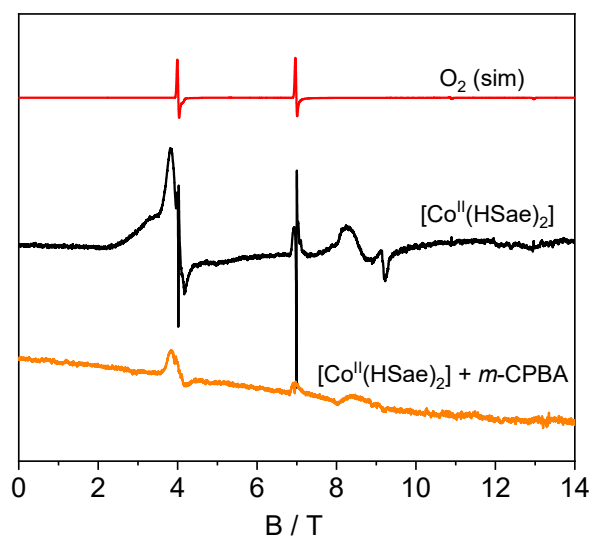

**Figure S29.** HF-EPR spectra (256 GHz, 5 K) of 20 mM solution of  $[\text{Co}(\text{HSae})_2]$  complex in acetonitrile, formed *in situ* (black line). After addition of 1 equivalent of *m*-CPBA (at room temperature) the deep green color of the initial solution immediately turned to dark brown one. This solution was frozen, and the spectrum recorded under the same conditions (orange line). The sharp lines, visible in the spectrum of the pure complex, correspond to frozen oxygen (red line).

## ESI-MS spectra of catalytic solutions

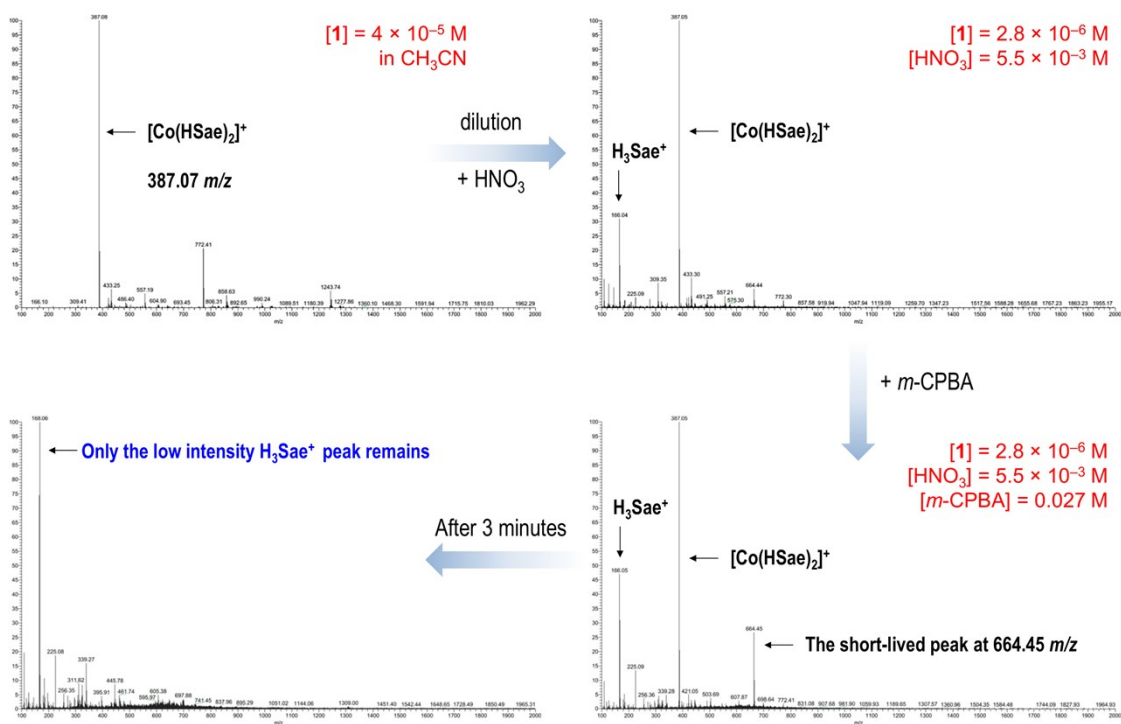

**Figure S30.** Evolution of the ESI-MS spectra of the complex **1** in the presence of other components of the catalytic system, in acetonitrile at room temperature. The detailed spectra are shown in Figure S31 in the same order.

930 #9-198 RT: 0.03-0.84 AV: 190 NL: 1.14E5  
F: ITMS + c ESI Full ms [100.00-2000.00]

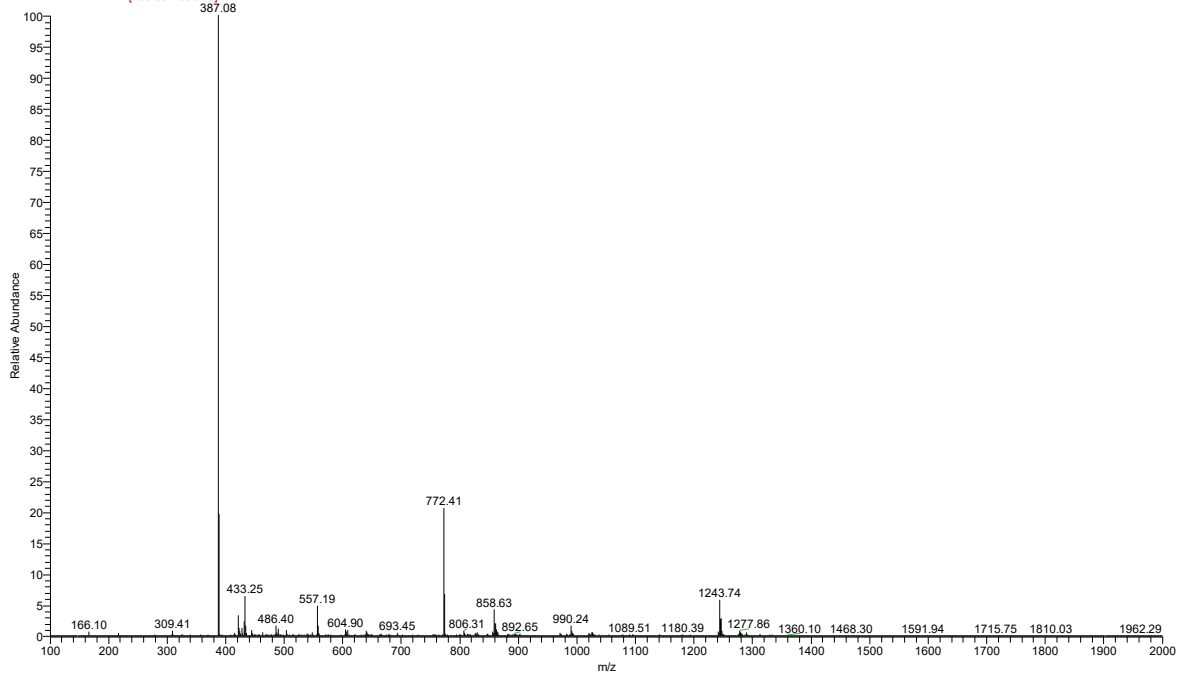

930+HNO3 #13-267 RT: 0.05-1.15 AV: 255 NL: 2.70E4  
F: ITMS + c ESI Full ms [100.00-2000.00]

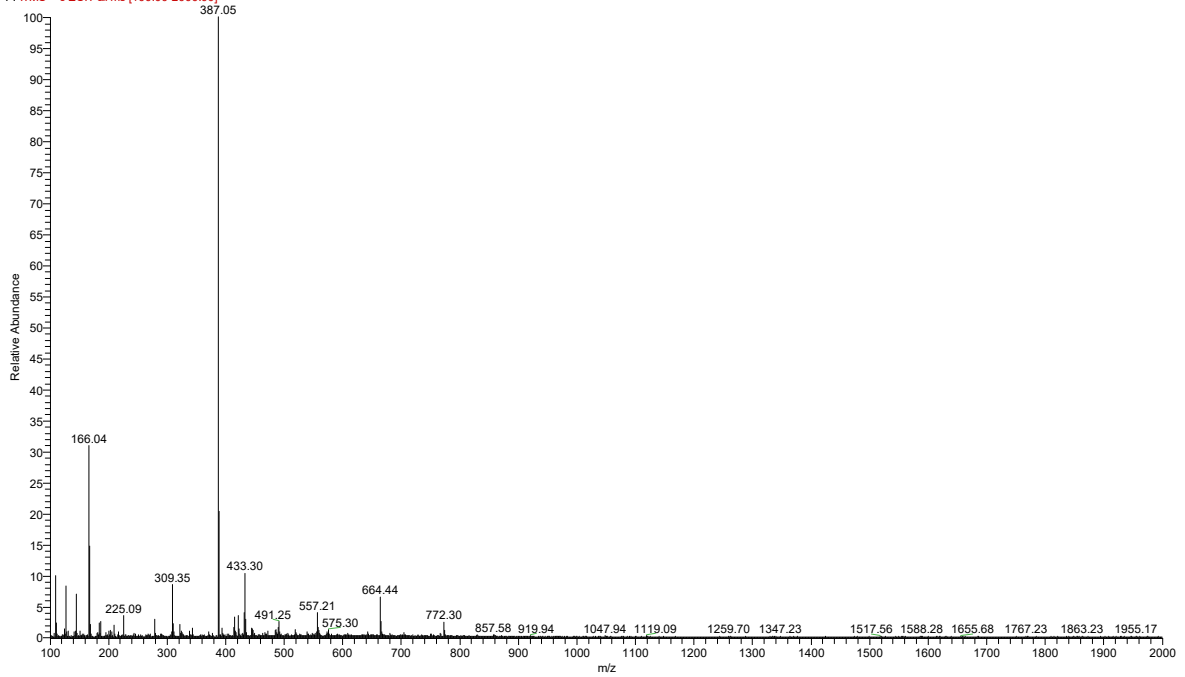

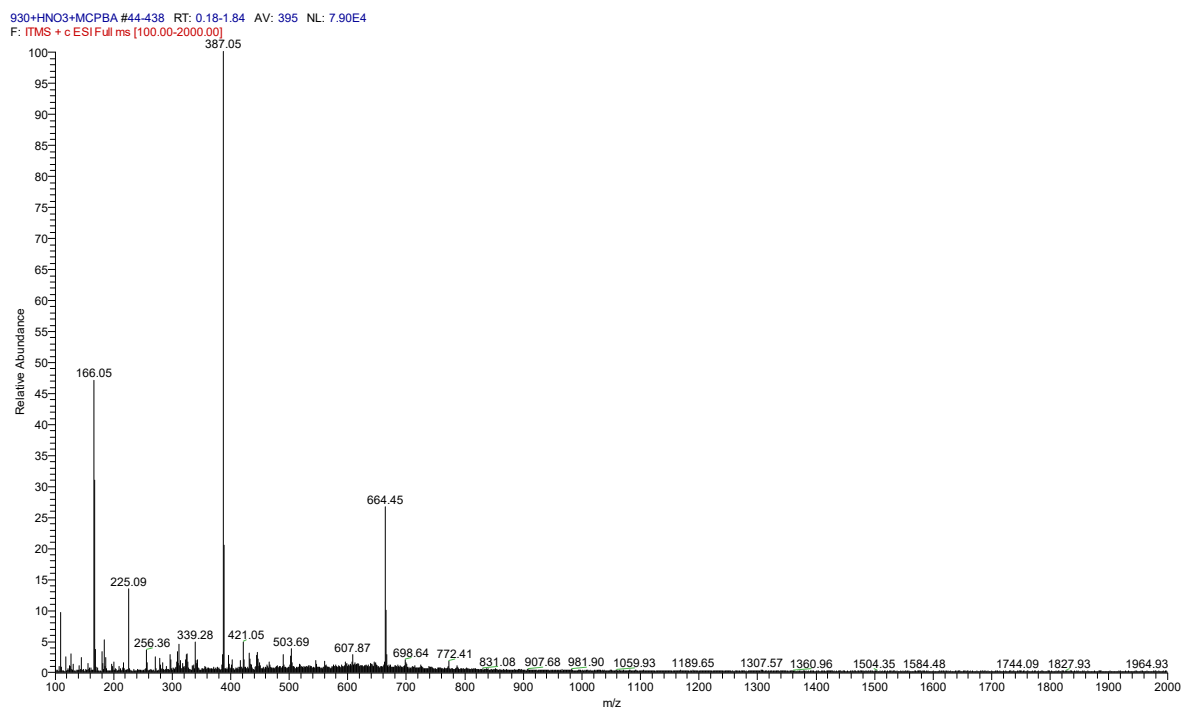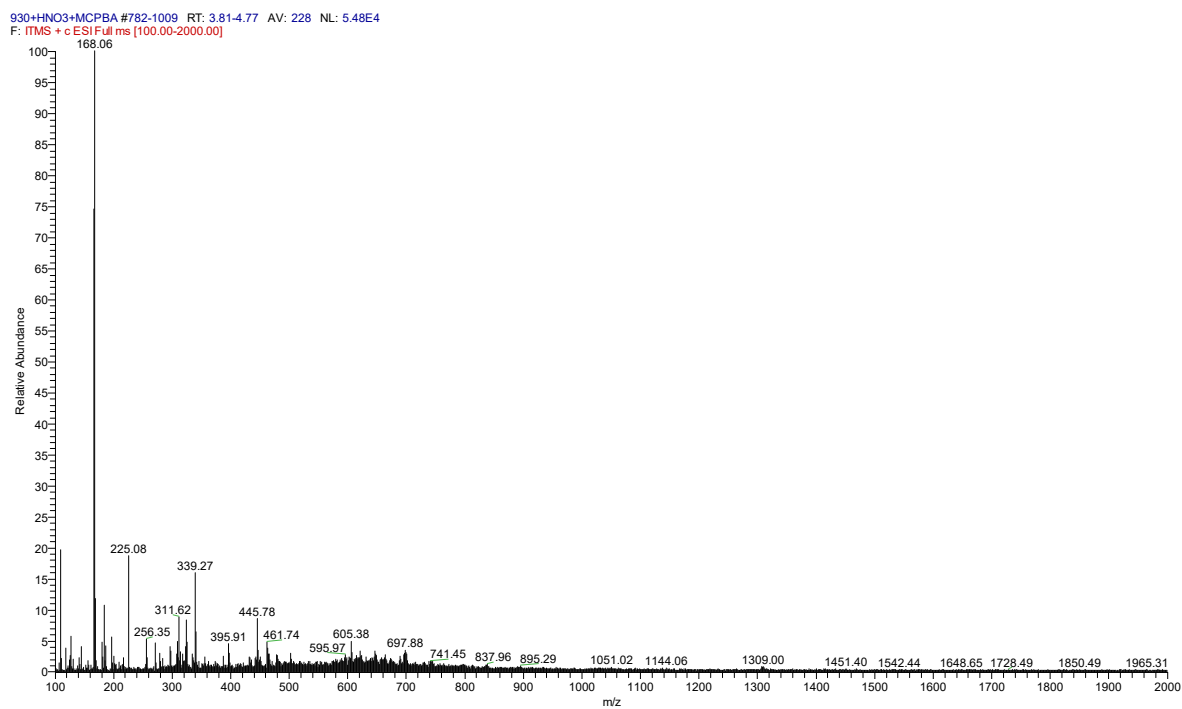

Figure S31. ESI-MS spectra corresponding to those shown in Figure S30 in the same order.

MCPBA #138-221 RT: 0.98-1.59 AV: 84 NL: 2.54E3  
F: ITMS - c ESI Full ms [100.00-500.00]

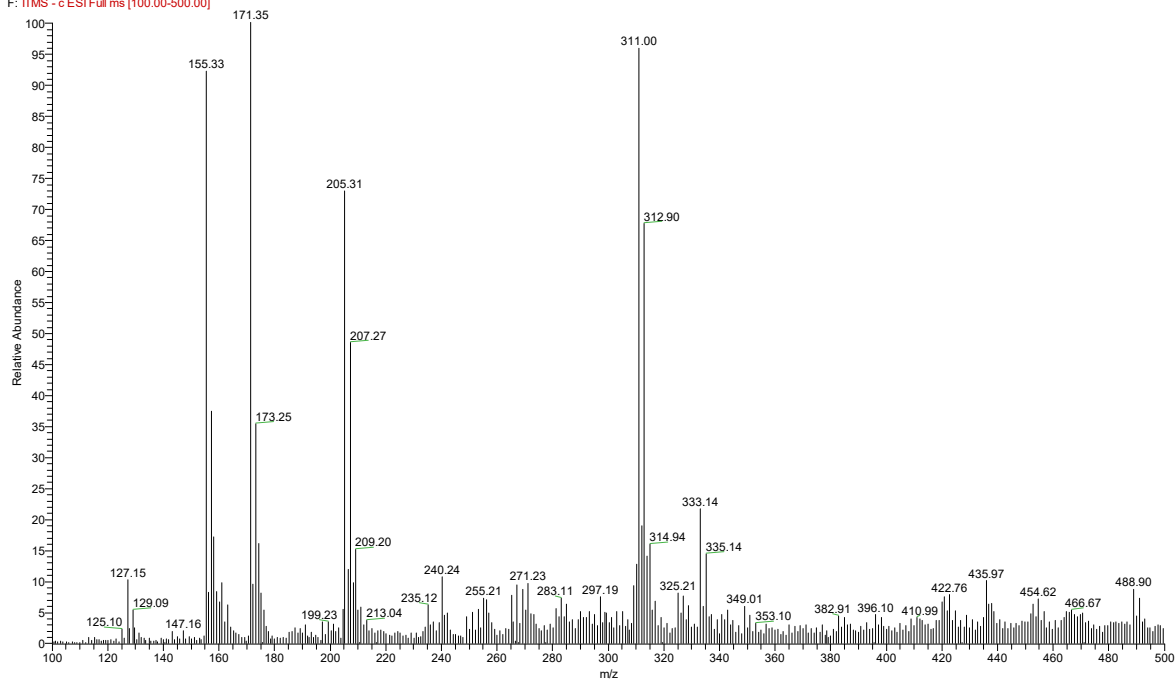

MCPBA #559-663 RT: 4.67-4.88 AV: 105 NL: 5.31E4  
F: ITMS + c ESI Full ms [100.00-500.00]

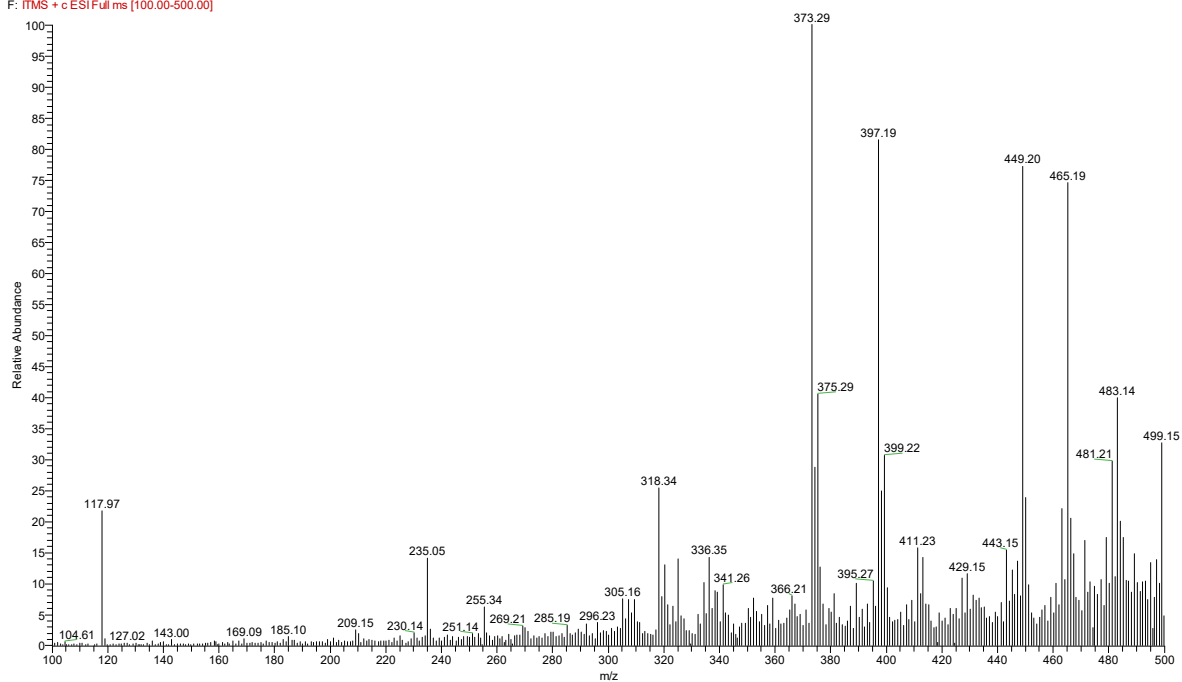

**Figure S32.** ESI-MS spectra recorded in negative (top) and positive (bottom) modes of the 0.03 M solution of *m*-CPBA in acetonitrile.

## *In situ* catalytic systems

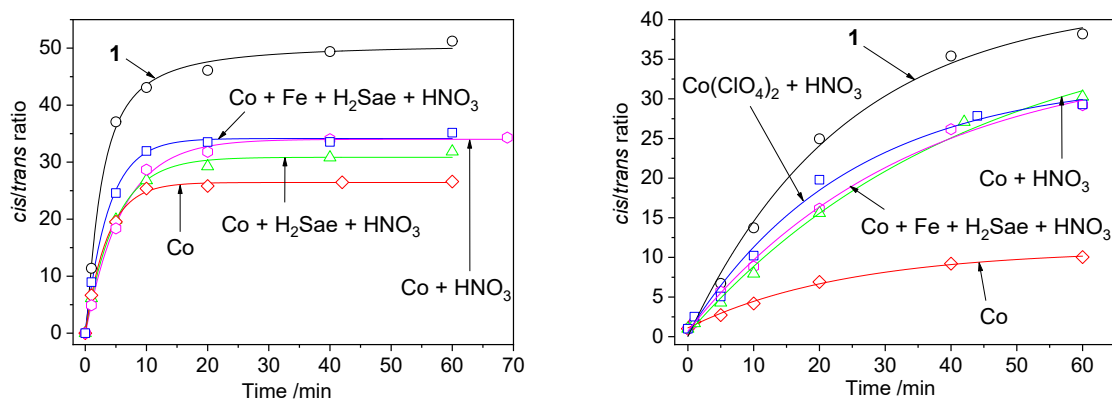

**Figure S33.** The *c/t* ratios as function of time shown for catalytic systems using pre-catalyst **1** and respective mixtures of salts and ligand H<sub>2</sub>Sae (*in situ* systems) in the presence or absence of HNO<sub>3</sub> ( $5.5 \times 10^{-3}$  M) for  $[\text{Co}]_0 = 1.2 \times 10^{-4}$  M (left) and  $1.1 \times 10^{-5}$  M (right). The salts are nitrates, unless stated otherwise. Concentration of the iron salt was twice lower than the cobalt one.

## Reaction mass balance for **1** and **2**

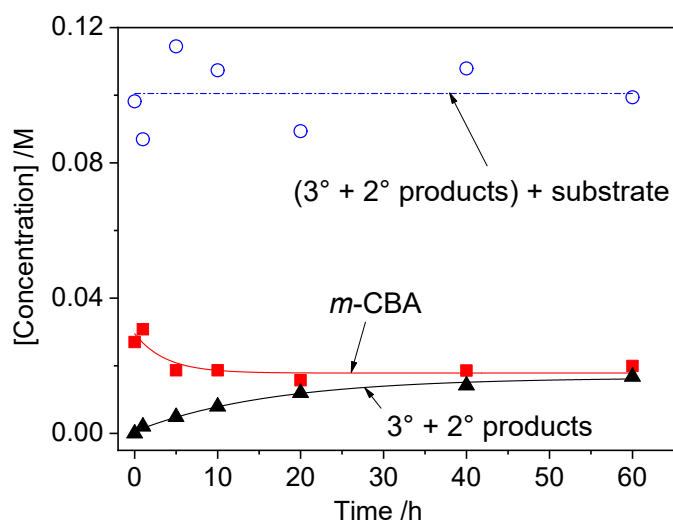

**Figure S34.** Accumulation of the sums of tertiary and secondary hydroxylation products ( $\Delta$ , black line), amount of *m*-chlorobenzoic acid (*m*-CBA) as a function of time after reduction of the samples with PPh<sub>3</sub> ( $\square$ , red line) and mass balance of the *cis*-1,2-DMCH oxidation (sum of hydroxylation products and substrate, where the latter was corrected for evaporation,  $\circ$ , blue line). The data correspond to the Entry 5, Table 1. The amounts of *m*-CBA were obtained by averaging four independent tests made under the same conditions and corrected for the “ballast” amount of *m*-CBA contained in the commercial *m*-CPBA oxidant (0.009 M under conditions of Entry 5).

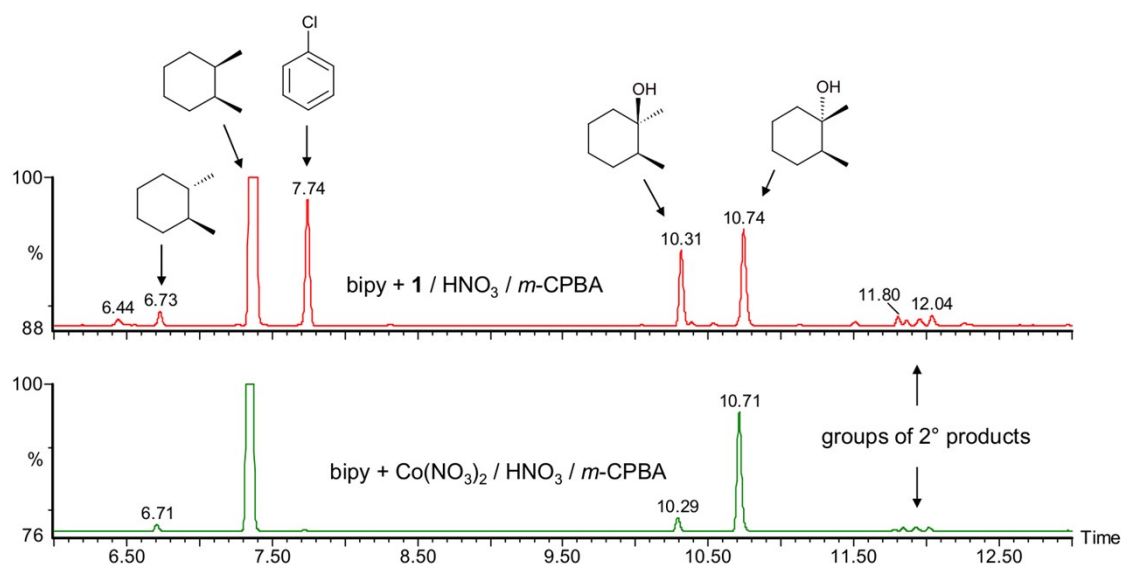

**Figure S35.** Fragments of the chromatograms showing the main reactions products, along with substrates, in the course of *cis*-1,2-DMCH (0.1 M) oxidation with *m*-CPBA (0.027 M) catalyzed by **1** ( $[I_{Co}]_0 = 1 \times 10^{-5}$  M, top) or  $Co(NO_3)_2$  ( $1 \times 10^{-5}$  M, bottom) in the presence of  $HNO_3$  ( $5.5 \times 10^{-3}$  M) and 2,2'-bipyridine ( $1.5 \times 10^{-5}$  M for **1** or  $1 \times 10^{-5}$  M for  $Co(NO_3)_2$ ) in acetonitrile at 50 °C after 1 h. The bipyridine was added prior in a form of stock solution in acetonitrile after addition of the catalyst solution.

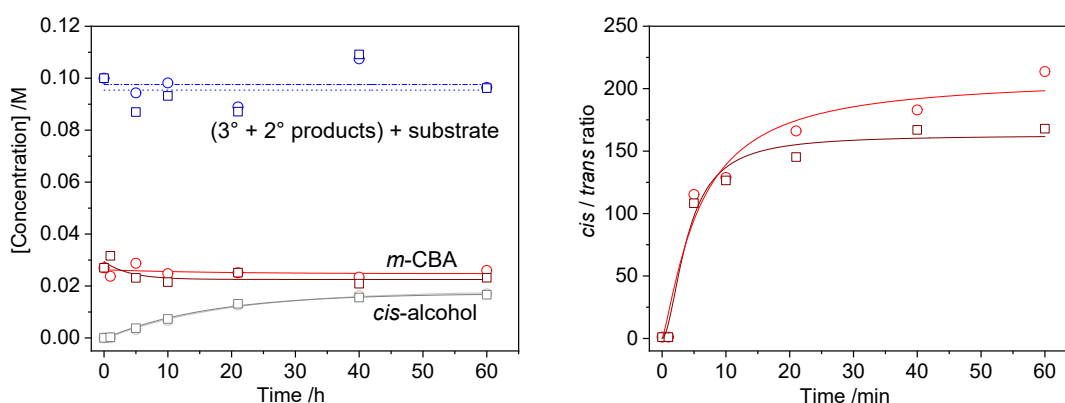

**Figure S36.** Left: Accumulation of the tertiary *cis*-alcohols, amount of *m*-chlorobenzoic acid (*m*-CBA) as a function of time after reduction of the samples with  $PPh_3$  and mass balance of the *cis*-1,2-DMCH oxidation (sum of hydroxylation products and substrate, where the latter was corrected for evaporation. The data correspond to the Entries 15 (○) and 16 (□), Table 1. The amounts of *m*-CBA were obtained by averaging four independent tests made under the same conditions and corrected for the “ballast” amount of *m*-CBA contained in the commercial *m*-CPBA oxidant (0.009 M under conditions of Entries 15 and 16). Right: *cis* / *trans* ratio as a function of time under the same conditions.



### Theoretical calculations: alternative reaction mechanisms

Besides the mechanisms discussed in the main text, several other possibilities were considered. First pathway is similar to the non-radical mechanism based on **TS1**. However, it affects the peroxy oxygen atom which is not bonded to the metal center (Scheme S1A). Second pathway is also concerted nonradical and it involves simultaneous formation of the C–O(1) bond and hydrogen transfer assisted by water which inevitably exists in the reaction mixture (or by any other possible proton shuttle) (Scheme S1B). However, careful analysis of the potential energy surface (PES) revealed that the corresponding transition states for these both pathways do not exist.

Search of PES for the system  $[\text{Co}(\text{Sae})_2(\text{NCMe})\{\underline{\text{O}}=\text{C}(\text{Me})\text{OOH}\}]^+ + \text{CH}_4$  with protonated peroxyacetic acid allowed the location of transition state **<sup>1</sup>TS6** (Scheme S1C) which corresponds to the simultaneous cleavage of the O(1)–O(2) and C(3)–H(4) bonds, transfer of the protons H(4) and H(5) and formation of the C(3)O(2) bond. However, the calculated activation energy of this pathway is 41.6 kcal/mol relative to  $[\text{Co}(\text{Sae})_2(\text{NCMe})\{\underline{\text{O}}=\text{C}(\text{Me})\text{OOH}\}]^+$  and  $\text{CH}_4$ . Thus, this mechanism is not the most plausible one.

For the model reaction of the methane oxidation with peroxyacetic acid and catalyst **II**, another possible transition state (**<sup>1</sup>TS4**) with the  $\eta^2$ -coordinated peroxyacetate was also found for the concerted closed-shell non-radical mechanism (Scheme S3). However, **<sup>1</sup>TS4** is significantly less stable than **<sup>1</sup>TS1** (by 11.8 kcal/mol) and this possibility may be ruled out.

Besides the mechanism based on complex **<sup>3</sup>V**, another pathway including an H-abstraction by alkane from **<sup>3</sup>IIb** via **<sup>3</sup>TS5** to give the hydroxo complex  $[\text{Co}(\text{HL})_2(\text{OH})\{\text{OC}(\text{O})\text{Me}\}]$  (**<sup>3</sup>VI**) and methyl radical loosely bound to the hydroxo ligand is possible (Scheme S3,B). The hydrogen abstraction by complex **<sup>3</sup>V** (via **<sup>3</sup>TS2**) is more favourable than that by complex **<sup>3</sup>IIb** (via **<sup>3</sup>TS5**) by 6.4 kcal/mol. Similar rebound pathway  ${}^{5/7}\text{IIb} + \text{CH}_4 \rightarrow {}^{5/7}\text{TS5} \rightarrow {}^{5/7}\text{VI}$  was found for the quintet and septet surfaces. However, they are more energy demanding than the route on the triplet surface (by 4.8–18.8 kcal/mol).

### Computational details of the radical rebound mechanism

To investigate the radical rebound mechanism in more detail, calculations of the methane oxidation with peroxyacetic acid and catalyst **II** via this mechanism were carried out. The homolytic O–O bond cleavage requires the initial spin conversion of **II** from singlet to triplet state. Two structures of the triplet model complex **<sup>3</sup>II** were found (Scheme S3). In the first one (**<sup>3</sup>IIa**), spin density is mostly localized at the Co atom (1.75 e, Figure S37), and the Co–O(3) bond is significantly elongated (to 2.540 Å). In the second complex (**<sup>3</sup>IIb**), spin density is localized at the O(1), O(2) and Co atoms (1.35, 0.28 and 0.26 e, respectively). The O(1)–O(2) distance is 2.223 Å that corresponds to the spontaneous O–O bond rupture upon formation of **<sup>3</sup>IIb**. Finally, a simple rotation of the acetate ligand

around the Co–O(3) bond leads to the oxo-complex  $[\text{Co}(\text{HL})_2(\text{O})\{\text{OC}(\text{O})\text{Me}\}]$  ( ${}^3\text{V}$ ). Therefore, complex  ${}^3\text{V}$  (or  ${}^3\text{Vr}$  which corresponds to the real species used in this work) may be considered as an active catalytic species for this mechanism.

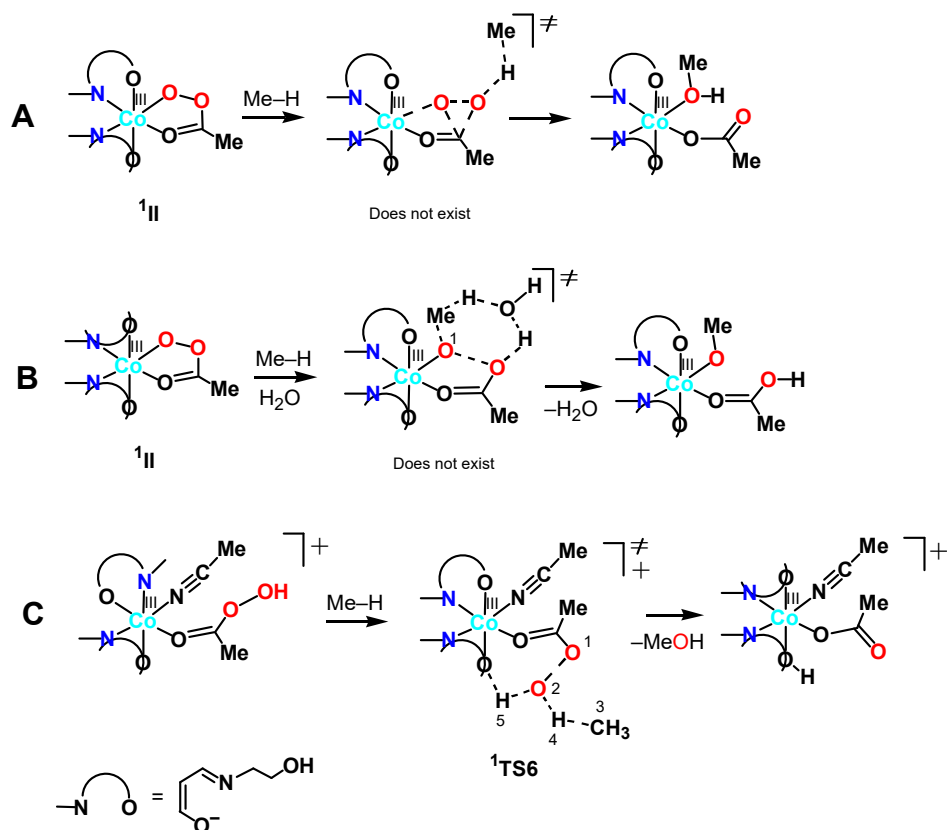

**Scheme S1.** Alternative mechanisms of hydroxylation.

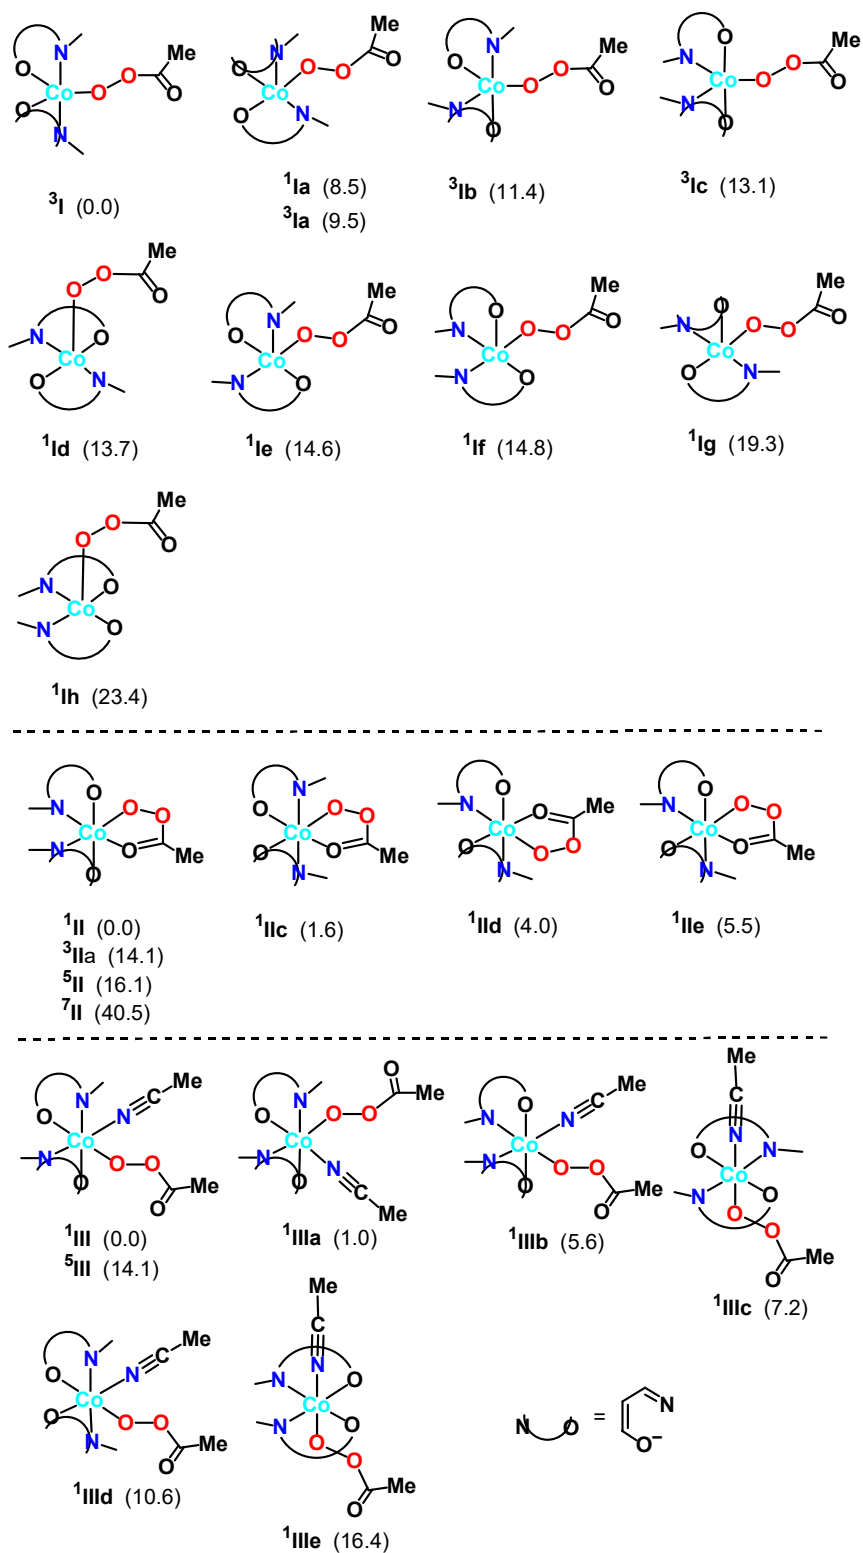

**Scheme S2.** The calculated structures of various isomers of complexes I–III with relative energies (in kcal/mol) and spin states (the upper index) indicated.

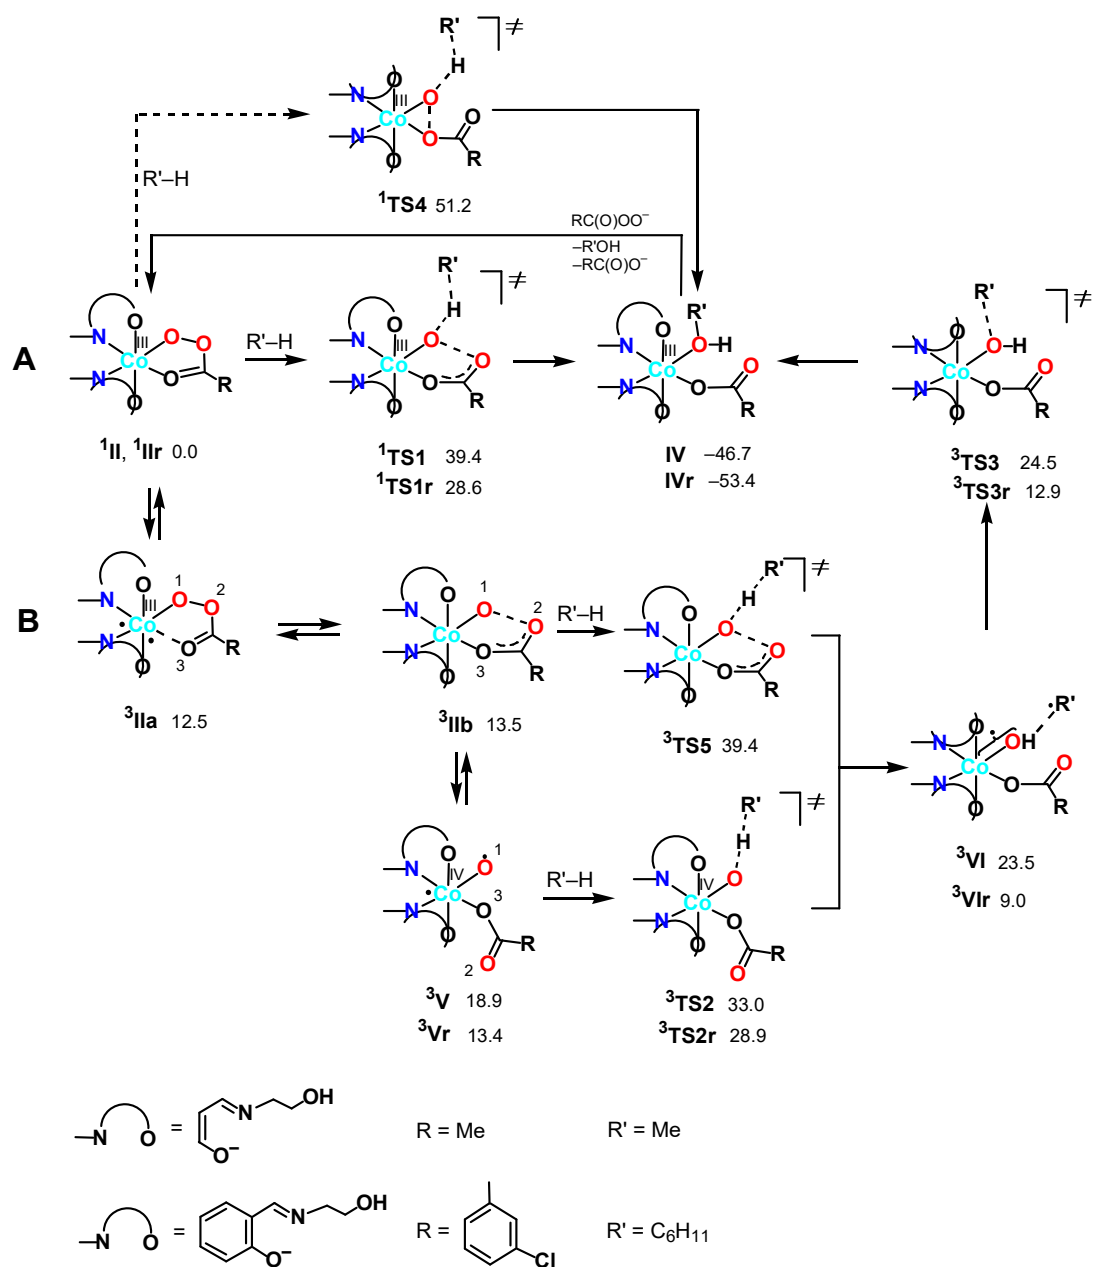

**Scheme S3.** The possible mechanisms of the alkane ( $\text{R}'\text{H}$ ) hydroxylation on the singlet (A) and triplet (B) surfaces (Gibbs free energies in  $\text{CH}_3\text{CN}$  solution are indicated relative to  $^1\text{II}$  or  $^1\text{IIr}$  in kcal/mol).

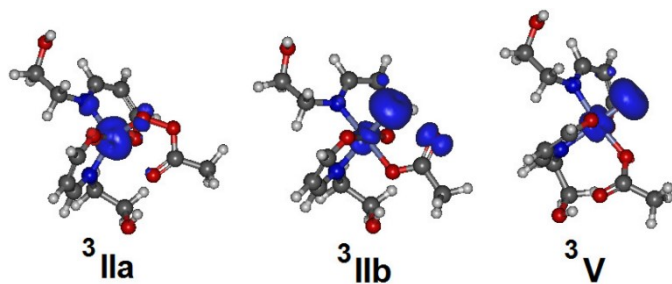

**Figure S37.** Spin density distribution in  $^3\text{IIa}$ ,  $^3\text{IIb}$  and  $^3\text{V}$ .

**Table S2.** Calculated total energies ( $E_g$ ,  $E_s$ ), enthalpies ( $H_g$ ,  $H_s$ ), Gibbs free energies ( $G_g$ ,  $G_s$ ) (in Hartree) and entropies ( $S_g$ ,  $S_s$ ) (in cal/mol•K) in gas phase and acetonitrile solution.

|                                | $E_g$        | $E_s$        | $H_g$        | $H_s$        | $S_g$  | $S_s$  | $G_g$        | $G_s$        |
|--------------------------------|--------------|--------------|--------------|--------------|--------|--------|--------------|--------------|
| MeCN                           | -132.667040  | -132.718468  | -132.617182  | -132.668610  | 60.14  | 42.78  | -132.645754  | -132.688934  |
| CH <sub>4</sub>                | -40.483901   | -40.498456   | -40.435148   | -40.449703   | 46.67  | 32.40  | -40.457323   | -40.465099   |
| C <sub>6</sub> H <sub>12</sub> | -235.703449  | -235.770012  | -235.526794  | -235.593357  | 74.68  | 53.97  | -235.562275  | -235.619001  |
| <sup>3</sup> I                 | -1249.930822 | -1250.327156 | -1249.586141 | -1249.982475 | 174.53 | 130.86 | -1249.669065 | -1250.044649 |
| <sup>1</sup> Ia                | -1249.917271 |              | -1249.571902 |              | 166.14 |        | -1249.650840 |              |
| <sup>3</sup> Ia                | -1249.915644 |              | -1249.571705 |              | 172.21 |        | -1249.653529 |              |
| <sup>3</sup> Ib                | -1249.912592 |              | -1249.568369 |              | 175.72 |        | -1249.651860 |              |
| <sup>3</sup> Ic                | -1249.909998 |              | -1249.565956 |              | 180.79 |        | -1249.651856 |              |
| <sup>1</sup> Id                | -1249.908942 |              | -1249.563842 |              | 170.37 |        | -1249.644791 |              |
| <sup>1</sup> Ie                | -1249.907563 |              | -1249.562475 |              | 168.87 |        | -1249.642710 |              |
| <sup>1</sup> If                | -1249.907201 |              | -1249.562025 |              | 167.00 |        | -1249.641370 |              |
| <sup>1</sup> Ig                | -1249.900104 |              | -1249.555345 |              | 169.67 |        | -1249.635963 |              |
| <sup>1</sup> Ih                | -1249.893547 |              | -1249.548952 |              | 168.62 |        | -1249.629067 |              |
| <sup>1</sup> II                | -1249.941218 | -1250.338466 | -1249.595186 | -1249.992434 | 161.53 | 120.85 | -1249.671931 | -1250.049852 |
| <sup>3</sup> IIa               | -1249.918714 | -1250.313184 | -1249.574074 | -1249.968544 | 172.40 | 129.22 | -1249.655988 | -1250.029939 |
| <sup>3</sup> IIb               | -1249.915844 | -1250.314687 | -1249.571230 | -1249.970073 | 163.95 | 122.71 | -1249.649127 | -1250.028376 |
| <sup>5</sup> IIb               | -1249.915625 | -1250.309179 | -1249.571982 | -1249.965536 | 176.16 | 132.11 | -1249.655680 | -1250.028306 |
| <sup>7</sup> IIa               | -1249.818101 |              | -1249.477671 |              | 179.63 |        | -1249.563020 |              |
| <sup>7</sup> IIb               | -1249.876673 | -1250.280800 | -1249.535246 | -1249.939373 | 179.94 | 135.02 | -1249.620742 | -1250.003526 |
| <sup>1</sup> IIc               | -1249.938725 |              | -1249.593099 |              | 160.95 |        | -1249.669571 |              |
| <sup>1</sup> IId               | -1249.934875 |              | -1249.588920 |              | 159.40 |        | -1249.664655 |              |
| <sup>1</sup> IIe               | -1249.932381 |              | -1249.587223 |              | 165.34 |        | -1249.665783 |              |
| <sup>1</sup> III               | -1382.604801 | -1383.038291 | -1382.206935 | -1382.640425 | 183.37 | 137.66 | -1382.294061 | -1382.705833 |
| <sup>5</sup> III               | -1382.582265 |              | -1382.187510 |              | 196.94 |        | -1382.281082 |              |
| <sup>1</sup> IIIa              | -1382.603285 |              | -1382.205876 |              | 183.13 |        | -1382.292886 |              |
| <sup>1</sup> IIIb              | -1382.595926 |              | -1382.198587 |              | 185.22 |        | -1382.286592 |              |
| <sup>1</sup> IIIc              | -1382.593310 |              | -1382.196351 |              | 196.42 |        | -1382.289677 |              |
| <sup>1</sup> IIId              | -1382.587940 |              | -1382.190917 |              | 191.14 |        | -1382.281735 |              |

|                         |              |              |              |              |        |        |              |              |
|-------------------------|--------------|--------------|--------------|--------------|--------|--------|--------------|--------------|
| <b><sup>1</sup>IIIe</b> | -1382.578741 |              | -1382.181964 |              | 186.18 |        | -1382.270424 |              |
| <b><sup>1</sup>IIIr</b> | -2208.134411 | -2208.673559 | -2207.642148 | -2208.181296 | 207.72 | 156.41 | -2207.740845 | -2208.255613 |
| <b><sup>1</sup>IV</b>   | -1290.502940 | -1290.926150 | -1290.103313 | -1290.526523 | 176.29 | 132.21 | -1290.187073 | -1290.589341 |
| <b><sup>3</sup>IV</b>   | -1290.481659 | -1290.900998 | -1290.084158 | -1290.503497 | 187.83 | 141.10 | -1290.173403 | -1290.570537 |
| <b><sup>7</sup>IV</b>   | -1290.380420 |              | -1289.986891 |              | 195.55 |        | -1290.079801 |              |
| <b><sup>1</sup>IVr</b>  | -2443.943040 | -2444.545463 | -2443.271126 | -2443.873549 | 240.00 | 181.27 | -2443.385156 | -2443.959675 |
| <b><sup>3</sup>V</b>    | -1249.903907 | -1250.304343 | -1249.559864 | -1249.960300 | 167.24 | 125.24 | -1249.639322 | -1250.019807 |
| <b><sup>5</sup>V</b>    | -1249.898936 | -1250.305107 | -1249.556655 | -1249.962826 | 175.28 | 131.43 | -1249.639937 | -1250.025274 |
| <b><sup>7</sup>V</b>    | -1249.879047 | -1250.286474 | -1249.538378 | -1249.945805 | 182.29 | 136.83 | -1249.624991 | -1250.010818 |
| <b><sup>3</sup>Vr</b>   | -2208.105269 | -2208.647105 | -2207.615130 | -2208.156966 | 215.73 | 162.58 | -2207.717630 | -2208.234213 |
| <b><sup>3</sup>VI</b>   | -1290.378610 | -1290.799692 | -1289.987074 | -1290.408156 | 193.92 | 145.79 | -1290.079209 | -1290.477424 |
| <b><sup>3</sup>VIr</b>  | -2443.813195 | -2444.430464 | -2443.146805 | -2443.764074 | 267.47 | 202.42 | -2443.273887 | -2443.860250 |
| <b><sup>1</sup>TS1</b>  | -1290.366360 | -1290.782246 | -1289.975401 | -1290.391287 | 170.84 | 128.02 | -1290.056574 | -1290.452111 |
| <b><sup>1</sup>TS1r</b> | -2443.793610 | -2444.405196 | -2443.129431 | -2443.741017 | 245.10 | 185.20 | -2443.245883 | -2443.829009 |
| <b><sup>1</sup>TS4</b>  | -1290.349771 | -1290.761680 | -1289.958951 | -1290.370860 | 175.50 | 131.60 | -1290.042336 | -1290.433389 |
| <b><sup>3</sup>TS4</b>  | -1290.331117 |              | -1289.941618 |              | 180.05 |        | -1290.027164 |              |
| <b><sup>3</sup>TS5</b>  | -1290.336830 | -1290.770963 | -1289.950285 | -1290.384418 | 189.62 | 142.48 | -1290.040379 | -1290.452113 |
| <b><sup>5</sup>TS5</b>  | -1290.350912 | -1290.752590 | -1289.964556 | -1290.366234 | 185.72 | 139.47 | -1290.052798 | -1290.432502 |
| <b><sup>7</sup>TS5</b>  | -1290.341794 | -1290.751376 | -1289.956729 | -1290.366311 | 192.16 | 144.43 | -1290.048032 | -1290.434935 |
| <b><sup>3</sup>TS2</b>  | -1290.368120 | -1290.784875 | -1289.980820 | -1290.397575 | 181.88 | 136.52 | -1290.067236 | -1290.462438 |
| <b><sup>5</sup>TS2</b>  | -1290.352140 | -1290.771438 | -1289.966952 | -1290.386250 | 191.80 | 144.15 | -1290.058081 | -1290.454742 |
| <b><sup>7</sup>TS2</b>  | -1290.341233 | -1290.757279 | -1289.957336 | -1290.373382 | 195.66 | 147.13 | -1290.050302 | -1290.443287 |
| <b><sup>3</sup>TS2r</b> | -2443.798025 | -2444.400487 | -2443.136095 | -2443.738557 | 250.75 | 189.55 | -2443.255233 | -2443.828616 |
| <b><sup>3</sup>TS3</b>  | -1290.373676 | -1290.798560 | -1289.983074 | -1290.407958 | 190.40 | 143.08 | -1290.073540 | -1290.475938 |
| <b><sup>3</sup>TS3r</b> | -2443.811357 | -2444.427523 | -2443.146379 | -2443.762545 | 254.52 | 192.45 | -2443.267309 | -2443.853984 |
| <b><sup>1</sup>TS6</b>  | -1423.424468 | -1423.925820 | -1422.969637 | -1423.470989 | 201.36 | 151.52 | -1423.065311 | -1423.542979 |

**Table S3.** Cartesian atomic coordinates (in Å) of the calculated equilibrium structures (atomic symbols or nuclear charges are given in the first column).

MeCN

|   |  |           |           |          |
|---|--|-----------|-----------|----------|
| N |  | -1.081372 | -1.530901 | 0.993099 |
| C |  | -1.610684 | -2.347075 | 1.630271 |
| C |  | -2.275390 | -3.372502 | 2.431481 |
| H |  | -2.580113 | -4.213916 | 1.797663 |
| H |  | -3.168090 | -2.959122 | 2.916015 |
| H |  | -1.598685 | -3.747934 | 3.208486 |

CH<sub>4</sub>

|   |           |           |           |
|---|-----------|-----------|-----------|
| C | 0.000000  | 0.000000  | 0.000000  |
| H | 0.632101  | 0.000000  | 0.893988  |
| H | 0.632101  | 0.000000  | -0.893988 |
| H | -0.632101 | 0.893988  | 0.000000  |
| H | -0.632101 | -0.893988 | 0.000000  |

C<sub>6</sub>H<sub>12</sub>

|   |           |           |           |
|---|-----------|-----------|-----------|
| H | -2.852985 | -0.112215 | 1.178848  |
| C | -2.023257 | -0.531906 | 1.771286  |
| C | -1.572054 | 0.506329  | 2.811717  |
| C | -0.873868 | -0.917114 | 0.825287  |
| H | -2.420411 | -1.426470 | 2.272734  |
| C | -0.954912 | 1.744873  | 2.140893  |
| C | -0.256927 | 0.321491  | 0.154400  |
| C | 0.194443  | 1.359604  | 1.194878  |
| H | -0.093551 | -1.441763 | 1.401006  |
| H | -1.228619 | -1.626559 | 0.063570  |
| H | 0.589372  | 0.028063  | -0.483589 |
| H | -1.005483 | 0.781098  | -0.512013 |
| H | 1.024142  | 0.939718  | 1.787230  |
| H | 0.591705  | 2.254176  | 0.693539  |
| H | -1.735092 | 2.269699  | 1.565161  |
| H | -0.600095 | 2.454191  | 2.902704  |
| H | -2.418518 | 0.799887  | 3.449441  |
| H | -0.823709 | 0.046768  | 3.478377  |

<sup>31</sup>I

|    |           |           |           |
|----|-----------|-----------|-----------|
| H  | 1.845313  | -2.213470 | -3.114181 |
| C  | 1.849868  | -3.021584 | -2.380155 |
| C  | 3.097529  | -3.877645 | -2.588653 |
| N  | 1.782077  | -2.431740 | -1.035031 |
| Co | 2.205220  | -0.542960 | -0.844964 |
| C  | 1.432968  | -3.220704 | -0.051676 |
| O  | 2.192971  | -0.638853 | 1.066105  |
| N  | 2.618183  | 1.361450  | -0.648270 |
| C  | 3.408264  | 1.996201  | -1.471014 |
| O  | 3.737858  | -0.865018 | -1.984530 |
| C  | 1.925074  | 2.144304  | 0.383506  |
| H  | 2.362171  | 3.153056  | 0.399180  |
| C  | 0.408709  | 2.274944  | 0.168751  |
| H  | 0.958354  | -3.641414 | -2.554614 |
| H  | 2.112834  | 1.671234  | 1.354369  |
| H  | 3.470568  | 3.082239  | -1.349521 |
| O  | 0.099466  | 2.892632  | -1.059334 |
| H  | 0.030500  | 2.899733  | 0.996098  |
| H  | -0.068596 | 1.289567  | 0.255363  |
| H  | -0.278124 | 2.198444  | -1.638260 |
| H  | 3.163419  | -4.133114 | -3.661226 |
| O  | 2.977774  | -5.060067 | -1.795944 |
| H  | 3.981769  | -3.288815 | -2.314587 |
| H  | 3.869795  | -5.407744 | -1.637458 |
| H  | 1.164777  | -4.245533 | -0.317889 |
| H  | 1.089231  | -3.631636 | 2.038581  |
| C  | 1.402582  | -2.877035 | 1.323849  |
| C  | 1.805204  | -1.645208 | 1.783479  |
| H  | 1.815192  | -1.456002 | 2.865293  |
| H  | 5.117472  | -0.313872 | -3.346110 |
| C  | 4.379629  | 0.061475  | -2.623070 |
| C  | 4.234953  | 1.419814  | -2.470794 |
| H  | 4.838140  | 2.084460  | -3.081559 |
| O  | 0.782007  | 0.081854  | -1.860183 |
| O  | -0.219350 | -0.879766 | -2.283159 |



|   |           |           |           |
|---|-----------|-----------|-----------|
| C | -1.398500 | -0.250749 | -2.508983 |
| C | -2.421482 | -1.247734 | -3.009346 |
| O | -1.607657 | 0.933909  | -2.345559 |
| H | -2.037089 | -2.271466 | -3.016284 |
| H | -2.720732 | -0.963630 | -4.025445 |
| H | -3.311201 | -1.189289 | -2.372303 |

**<sup>1</sup>Ia**

|    |           |           |           |
|----|-----------|-----------|-----------|
| 1  | -0.651356 | -0.013688 | -0.850035 |
| 6  | -1.420108 | -0.690011 | -0.476014 |
| 6  | -1.638809 | -1.805227 | -1.496413 |
| 7  | -0.991182 | -1.212088 | 0.835483  |
| 27 | 0.888195  | -1.369119 | 1.302098  |
| 6  | -1.965454 | -1.644674 | 1.615516  |
| 8  | 0.535153  | -2.654346 | 2.654581  |
| 7  | 1.144832  | 0.047999  | 2.517893  |
| 6  | 2.300054  | 0.206979  | 3.126505  |
| 8  | 2.642312  | -2.060497 | 1.358876  |
| 6  | 0.111241  | 1.069603  | 2.715803  |
| 1  | 0.408185  | 1.669323  | 3.587519  |
| 6  | -0.056824 | 2.006576  | 1.496286  |
| 1  | -2.361723 | -0.132125 | -0.360671 |
| 1  | -0.843373 | 0.585532  | 2.955295  |
| 1  | 2.356234  | 1.064689  | 3.802760  |
| 8  | 1.179043  | 2.404498  | 0.942022  |
| 1  | -0.573424 | 2.913508  | 1.839449  |
| 1  | -0.697546 | 1.529792  | 0.743271  |
| 1  | 1.479339  | 1.649034  | 0.395282  |
| 1  | -1.829973 | -1.338419 | -2.478446 |
| 8  | -2.756549 | -2.587277 | -1.076319 |
| 1  | -0.724151 | -2.407523 | -1.579874 |
| 1  | -2.704394 | -3.448439 | -1.520997 |
| 1  | -2.986150 | -1.473363 | 1.265152  |
| 1  | -2.705876 | -2.587694 | 3.401312  |
| 6  | -1.815420 | -2.333739 | 2.834314  |
| 6  | -0.591238 | -2.840513 | 3.240029  |

|   |           |           |           |
|---|-----------|-----------|-----------|
| 1 | -0.549902 | -3.496980 | 4.120031  |
| 1 | 4.495191  | -2.230509 | 2.112760  |
| 6 | 3.557728  | -1.659732 | 2.156456  |
| 6 | 3.458995  | -0.584987 | 3.025737  |
| 1 | 4.311957  | -0.326305 | 3.644713  |
| 8 | 1.420391  | -0.230745 | -0.085178 |
| 8 | 1.484455  | -1.151309 | -1.214616 |
| 6 | 2.716715  | -1.217297 | -1.828323 |
| 6 | 3.771685  | -0.239946 | -1.383878 |
| 8 | 2.825656  | -2.032635 | -2.714894 |
| 1 | 3.419135  | 0.790112  | -1.515706 |
| 1 | 4.664744  | -0.408315 | -1.990936 |
| 1 | 3.998721  | -0.368646 | -0.321863 |

<sup>3</sup>la

|    |           |           |           |
|----|-----------|-----------|-----------|
| 1  | 2.975576  | 1.938056  | 0.270762  |
| 6  | 3.743040  | 1.181932  | 0.450270  |
| 6  | 4.494233  | 1.526563  | 1.733740  |
| 7  | 3.097677  | -0.136765 | 0.531358  |
| 27 | 1.362081  | -0.334158 | 1.399267  |
| 6  | 3.809057  | -1.167605 | 0.119642  |
| 8  | 1.793877  | -2.115203 | 1.940065  |
| 7  | 0.202365  | -1.037010 | -0.181207 |
| 6  | -0.895298 | -1.680246 | 0.115758  |
| 8  | -0.003467 | -0.452658 | 2.691884  |
| 6  | 0.496169  | -0.804228 | -1.593269 |
| 1  | -0.302548 | -1.242116 | -2.212488 |
| 6  | 0.621498  | 0.698480  | -1.915777 |
| 1  | 4.456867  | 1.184863  | -0.386680 |
| 1  | 1.442012  | -1.302484 | -1.855737 |
| 1  | -1.489631 | -2.079301 | -0.717653 |
| 8  | -0.465184 | 1.455230  | -1.419620 |
| 1  | 0.635058  | 0.815287  | -3.007943 |
| 1  | 1.578901  | 1.079496  | -1.529583 |
| 1  | -0.278082 | 1.589645  | -0.469754 |
| 1  | 4.866702  | 2.562343  | 1.648446  |

|   |           |           |           |
|---|-----------|-----------|-----------|
| 8 | 5.569061  | 0.601010  | 1.875990  |
| 1 | 3.801050  | 1.487219  | 2.587074  |
| 1 | 5.865207  | 0.622255  | 2.800157  |
| 1 | 4.740047  | -0.941451 | -0.408129 |
| 1 | 4.163136  | -3.280986 | -0.083165 |
| 6 | 3.515526  | -2.525191 | 0.350091  |
| 6 | 2.588138  | -2.900564 | 1.309891  |
| 1 | 2.541291  | -3.951809 | 1.625116  |
| 1 | -1.547637 | -1.453192 | 3.500427  |
| 6 | -0.988113 | -1.281540 | 2.571247  |
| 6 | -1.427721 | -1.900185 | 1.416885  |
| 1 | -2.314616 | -2.523471 | 1.491230  |
| 8 | 0.966130  | 1.440312  | 1.079857  |
| 8 | 1.189210  | 2.138345  | 2.336752  |
| 6 | 0.060030  | 2.725743  | 2.873524  |
| 6 | -1.211124 | 2.671912  | 2.068693  |
| 8 | 0.208897  | 3.273822  | 3.939687  |
| 1 | -1.073987 | 3.160103  | 1.095886  |
| 1 | -1.987850 | 3.193524  | 2.633420  |
| 1 | -1.509057 | 1.635412  | 1.883308  |

**<sup>3</sup>1b**

|    |           |           |           |
|----|-----------|-----------|-----------|
| 1  | -0.205768 | -3.205012 | 1.136307  |
| 6  | 0.507160  | -3.417063 | 0.332882  |
| 6  | -0.267648 | -3.828088 | -0.932555 |
| 7  | 1.355888  | -2.247511 | 0.081276  |
| 27 | 0.613591  | -0.399056 | -0.090016 |
| 6  | 2.627157  | -2.512652 | -0.183520 |
| 8  | 2.141805  | 0.220192  | -1.051980 |
| 7  | -1.010827 | -0.808168 | 0.896805  |
| 6  | -2.215702 | -0.777647 | 0.373369  |
| 8  | -0.313505 | -0.259056 | -1.812704 |
| 6  | -0.836891 | -0.905742 | 2.356936  |
| 1  | -0.700948 | 0.109372  | 2.757961  |
| 6  | -1.923552 | -1.642391 | 3.146703  |
| 1  | 1.136342  | -4.261582 | 0.651669  |

|   |           |           |           |
|---|-----------|-----------|-----------|
| 1 | 0.116740  | -1.420315 | 2.535508  |
| 1 | -3.052686 | -0.889234 | 1.066913  |
| 8 | -3.171059 | -0.957457 | 3.236503  |
| 1 | -1.518470 | -1.850442 | 4.151704  |
| 1 | -2.154465 | -2.608686 | 2.680195  |
| 1 | -3.008446 | -0.102337 | 3.672041  |
| 1 | -0.783061 | -4.777256 | -0.735293 |
| 8 | 0.594783  | -4.056945 | -2.035585 |
| 1 | -1.032481 | -3.072761 | -1.166815 |
| 1 | 0.880775  | -3.184143 | -2.356795 |
| 1 | 2.952411  | -3.545591 | -0.018746 |
| 1 | 4.617898  | -1.981046 | -0.779275 |
| 6 | 3.599090  | -1.624080 | -0.667338 |
| 6 | 3.289223  | -0.338907 | -1.095087 |
| 1 | 4.080471  | 0.278002  | -1.541899 |
| 1 | -1.931518 | -0.231840 | -3.012497 |
| 6 | -1.585931 | -0.360618 | -1.976235 |
| 6 | -2.531367 | -0.605665 | -0.995145 |
| 1 | -3.578481 | -0.643458 | -1.280687 |
| 8 | 0.678047  | 1.051638  | 1.039616  |
| 8 | 1.933914  | 1.762877  | 1.096667  |
| 6 | 1.973049  | 2.901272  | 0.323449  |
| 6 | 0.736421  | 3.271002  | -0.453509 |
| 8 | 3.010727  | 3.522992  | 0.346786  |
| 1 | 0.537739  | 2.521613  | -1.228578 |
| 1 | 0.910284  | 4.245686  | -0.916585 |
| 1 | -0.141861 | 3.308163  | 0.200152  |

<sup>3</sup>Ic

|    |          |           |           |
|----|----------|-----------|-----------|
| 1  | 0.461965 | 0.578931  | -1.330811 |
| 6  | 1.029383 | -0.251806 | -1.758278 |
| 6  | 2.504927 | 0.132138  | -1.813498 |
| 7  | 0.807541 | -1.453619 | -0.946427 |
| 27 | 0.817508 | -1.363460 | 1.062386  |
| 6  | 0.650280 | -2.584517 | -1.599015 |
| 8  | 0.948365 | -3.254416 | 1.236944  |

|   |           |           |           |
|---|-----------|-----------|-----------|
| 7 | 2.534241  | -1.146992 | 2.076446  |
| 6 | 2.906134  | 0.005030  | 2.593890  |
| 8 | 0.550050  | 0.507378  | 0.930629  |
| 6 | 3.331724  | -2.318564 | 2.452690  |
| 1 | 4.393353  | -2.030426 | 2.540895  |
| 6 | 2.863203  | -2.934843 | 3.779286  |
| 1 | 0.676235  | -0.426544 | -2.785652 |
| 1 | 3.255231  | -3.068899 | 1.661451  |
| 1 | 3.809500  | 0.002472  | 3.212169  |
| 8 | 3.082115  | -2.074272 | 4.892729  |
| 1 | 3.365663  | -3.908268 | 3.917347  |
| 1 | 1.784741  | -3.111454 | 3.734253  |
| 1 | 4.036879  | -2.067856 | 5.077563  |
| 1 | 2.595385  | 1.092178  | -2.352771 |
| 8 | 3.202975  | -0.909576 | -2.490394 |
| 1 | 2.884499  | 0.277486  | -0.790172 |
| 1 | 4.155192  | -0.752120 | -2.384979 |
| 1 | 0.617793  | -2.525466 | -2.692434 |
| 1 | 0.347893  | -4.711905 | -1.697231 |
| 6 | 0.525822  | -3.870968 | -1.034248 |
| 6 | 0.700854  | -4.115602 | 0.314889  |
| 1 | 0.656819  | -5.153227 | 0.673214  |
| 1 | 0.714466  | 2.413872  | 1.514613  |
| 6 | 1.148872  | 1.411392  | 1.621056  |
| 6 | 2.262076  | 1.247378  | 2.424879  |
| 1 | 2.669473  | 2.115608  | 2.933047  |
| 8 | -0.744761 | -1.609099 | 2.011830  |
| 8 | -1.409238 | -0.421298 | 2.490310  |
| 6 | -2.556568 | -0.117712 | 1.802563  |
| 6 | -2.970236 | -1.043696 | 0.685993  |
| 8 | -3.156519 | 0.872042  | 2.158448  |
| 1 | -2.211947 | -1.058861 | -0.105631 |
| 1 | -3.922511 | -0.685537 | 0.286651  |
| 1 | -3.070026 | -2.071550 | 1.052050  |

'Id

|    |           |           |           |
|----|-----------|-----------|-----------|
| 1  | 0.655920  | 0.871265  | -1.258280 |
| 6  | 0.922059  | 0.080026  | -1.961395 |
| 6  | 2.177551  | 0.489268  | -2.726322 |
| 7  | 1.097505  | -1.176306 | -1.214633 |
| 27 | 1.555942  | -1.120357 | 0.705942  |
| 6  | 0.835939  | -2.271120 | -1.887766 |
| 8  | 1.411745  | -3.002022 | 0.857110  |
| 7  | 2.200329  | -1.092538 | 2.570157  |
| 6  | 2.702538  | -0.022555 | 3.146091  |
| 8  | 2.224354  | 0.610753  | 0.361180  |
| 6  | 2.006466  | -2.265741 | 3.454372  |
| 1  | 2.982449  | -2.757170 | 3.611380  |
| 6  | 1.343317  | -1.989127 | 4.809964  |
| 1  | 0.099287  | -0.033904 | -2.681972 |
| 1  | 1.385630  | -2.979435 | 2.916456  |
| 1  | 2.951177  | -0.111943 | 4.206296  |
| 8  | 2.190987  | -1.370366 | 5.785928  |
| 1  | 0.953116  | -2.945369 | 5.195178  |
| 1  | 0.489920  | -1.318568 | 4.672895  |
| 1  | 2.886385  | -2.012104 | 6.012333  |
| 1  | 2.029133  | 1.510710  | -3.120136 |
| 8  | 2.372757  | -0.443695 | -3.789634 |
| 1  | 3.031321  | 0.505571  | -2.035527 |
| 1  | 3.288893  | -0.360205 | -4.099169 |
| 1  | 0.560377  | -2.148604 | -2.938258 |
| 1  | 0.654875  | -4.413902 | -2.063835 |
| 6  | 0.871697  | -3.593571 | -1.386660 |
| 6  | 1.151244  | -3.865171 | -0.066980 |
| 1  | 1.161468  | -4.908245 | 0.276607  |
| 1  | 2.934850  | 2.444785  | 0.777443  |
| 6  | 2.696261  | 1.462893  | 1.208228  |
| 6  | 2.938509  | 1.233137  | 2.540762  |
| 1  | 3.345986  | 2.032498  | 3.152150  |
| 8  | -0.151432 | -0.582848 | 1.083503  |
| 8  | -0.612829 | -1.224595 | 2.288449  |

|   |           |           |           |
|---|-----------|-----------|-----------|
| 6 | -1.653717 | -2.100419 | 2.087925  |
| 6 | -2.247320 | -2.184534 | 0.706433  |
| 8 | -2.025107 | -2.716152 | 3.062668  |
| 1 | -2.534178 | -1.190530 | 0.346384  |
| 1 | -3.120289 | -2.840631 | 0.755089  |
| 1 | -1.515764 | -2.585827 | -0.003680 |

**Te**

|    |           |           |           |
|----|-----------|-----------|-----------|
| 1  | -0.059560 | -2.294189 | -2.303044 |
| 6  | 0.916892  | -2.769046 | -2.180521 |
| 6  | 1.627660  | -2.835044 | -3.530304 |
| 7  | 1.696371  | -2.033854 | -1.173605 |
| 27 | 1.528207  | -0.067463 | -0.990581 |
| 6  | 2.481403  | -2.770782 | -0.420133 |
| 8  | 2.914800  | 0.016140  | 0.301513  |
| 7  | -0.009285 | -0.115202 | 0.075766  |
| 6  | -1.211544 | 0.035753  | -0.423258 |
| 8  | 0.660101  | 0.056592  | -2.649547 |
| 6  | 0.241689  | -0.142060 | 1.522281  |
| 1  | 0.760678  | 0.791109  | 1.788253  |
| 6  | -0.967627 | -0.354824 | 2.436580  |
| 1  | 0.745809  | -3.799483 | -1.834627 |
| 1  | 0.947028  | -0.958106 | 1.725220  |
| 1  | -2.023917 | 0.119724  | 0.300412  |
| 8  | -1.942568 | 0.681275  | 2.408976  |
| 1  | -0.573357 | -0.500665 | 3.457279  |
| 1  | -1.503021 | -1.271870 | 2.159679  |
| 1  | -1.489993 | 1.526178  | 2.579359  |
| 1  | 0.931742  | -3.268033 | -4.271303 |
| 8  | 2.783506  | -3.655817 | -3.372942 |
| 1  | 1.886829  | -1.817805 | -3.854458 |
| 1  | 3.387281  | -3.471761 | -4.110228 |
| 1  | 2.462705  | -3.850746 | -0.594492 |
| 1  | 3.963541  | -3.036335 | 1.118979  |
| 6  | 3.366275  | -2.306943 | 0.580192  |
| 6  | 3.550643  | -0.963856 | 0.841930  |

|   |           |           |           |
|---|-----------|-----------|-----------|
| 1 | 4.308759  | -0.662616 | 1.577788  |
| 1 | -0.943202 | 0.314155  | -3.836636 |
| 6 | -0.614477 | 0.179000  | -2.798789 |
| 6 | -1.555950 | 0.140895  | -1.791094 |
| 1 | -2.603409 | 0.266669  | -2.044868 |
| 8 | 1.733032  | 1.768012  | -0.867776 |
| 8 | 0.635151  | 2.530573  | -1.424871 |
| 6 | 0.967808  | 3.225687  | -2.554578 |
| 6 | 2.400798  | 3.162929  | -3.022511 |
| 8 | 0.080992  | 3.856920  | -3.090128 |
| 1 | 3.092029  | 3.406938  | -2.209219 |
| 1 | 2.515172  | 3.864657  | -3.852948 |
| 1 | 2.643188  | 2.147702  | -3.357385 |

**1f**

|    |           |           |           |
|----|-----------|-----------|-----------|
| 1  | -0.811938 | -0.862663 | -1.757384 |
| 6  | -1.348231 | -1.504061 | -1.055594 |
| 6  | -1.725734 | -2.810338 | -1.755235 |
| 7  | -0.511192 | -1.719223 | 0.134661  |
| 27 | 1.435268  | -1.399377 | 0.174994  |
| 6  | -1.184037 | -2.049639 | 1.223798  |
| 8  | 1.628604  | -2.393687 | 1.773765  |
| 7  | 1.474249  | -0.633202 | -1.602507 |
| 6  | 1.579567  | 0.658293  | -1.788275 |
| 8  | 1.336430  | 0.186173  | 1.115030  |
| 6  | 1.718169  | -1.501469 | -2.759022 |
| 1  | 1.466366  | -0.938800 | -3.670150 |
| 6  | 3.192654  | -1.979187 | -2.842321 |
| 1  | -2.278377 | -0.988345 | -0.774128 |
| 1  | 1.050652  | -2.373498 | -2.712670 |
| 1  | 1.722113  | 1.003012  | -2.816753 |
| 8  | 4.095381  | -0.931891 | -2.573006 |
| 1  | 3.374940  | -2.329152 | -3.867650 |
| 1  | 3.350836  | -2.827865 | -2.163057 |
| 1  | 4.063829  | -0.838630 | -1.593474 |
| 1  | -2.197650 | -2.566583 | -2.723754 |



|   |           |           |           |
|---|-----------|-----------|-----------|
| 8 | -2.622359 | -3.525803 | -0.912751 |
| 1 | -0.814724 | -3.396846 | -1.958355 |
| 1 | -2.656087 | -4.448355 | -1.213428 |
| 1 | -2.273215 | -2.064831 | 1.140810  |
| 1 | -1.322210 | -2.659981 | 3.278963  |
| 6 | -0.642394 | -2.425721 | 2.465621  |
| 6 | 0.715334  | -2.631347 | 2.640674  |
| 1 | 1.076340  | -3.061283 | 3.584869  |
| 1 | 1.347513  | 2.169389  | 1.288772  |
| 6 | 1.394290  | 1.350677  | 0.559799  |
| 6 | 1.506070  | 1.649472  | -0.780273 |
| 1 | 1.560915  | 2.692076  | -1.076220 |
| 8 | 3.324541  | -1.292858 | 0.124369  |
| 8 | 3.758316  | -2.679462 | 0.156193  |
| 6 | 4.469537  | -3.010342 | 1.290535  |
| 6 | 4.820579  | -1.896044 | 2.239774  |
| 8 | 4.787722  | -4.172031 | 1.400249  |
| 1 | 5.352742  | -1.094954 | 1.714422  |
| 1 | 5.447398  | -2.312955 | 3.032472  |
| 1 | 3.909694  | -1.457178 | 2.657525  |

<sup>1</sup>Ig

|    |           |           |           |
|----|-----------|-----------|-----------|
| 1  | 1.769885  | -3.564914 | 2.858461  |
| 6  | 2.740305  | -3.072188 | 2.724414  |
| 6  | 3.660637  | -3.971970 | 1.903493  |
| 7  | 2.509513  | -1.770438 | 2.100301  |
| 27 | 1.027726  | -1.616599 | 0.850873  |
| 6  | 3.292251  | -0.772232 | 2.396218  |
| 8  | 1.072936  | 0.221166  | 0.718012  |
| 7  | -0.492006 | -1.733178 | -0.364358 |
| 6  | -1.739768 | -1.872785 | 0.026979  |
| 8  | -0.047019 | -1.920625 | 2.388108  |
| 6  | -0.215509 | -1.545236 | -1.802326 |
| 1  | 0.321523  | -2.434079 | -2.165545 |
| 6  | -1.388614 | -1.224138 | -2.726558 |
| 1  | 3.183652  | -2.940336 | 3.722848  |

|   |           |           |           |
|---|-----------|-----------|-----------|
| 1 | 0.501882  | -0.723283 | -1.884761 |
| 1 | -2.501840 | -1.944713 | -0.750342 |
| 8 | -2.340565 | -2.276284 | -2.900368 |
| 1 | -0.962146 | -0.921015 | -3.697765 |
| 1 | -1.961416 | -0.369771 | -2.344342 |
| 1 | -1.858620 | -3.052934 | -3.233806 |
| 1 | 3.641630  | -4.985870 | 2.339833  |
| 8 | 4.973253  | -3.414516 | 1.963859  |
| 1 | 3.297522  | -4.027778 | 0.866128  |
| 1 | 5.525905  | -3.870099 | 1.307611  |
| 1 | 4.115860  | -0.963945 | 3.091153  |
| 1 | 3.879328  | 1.295316  | 2.176210  |
| 6 | 3.142109  | 0.548532  | 1.899631  |
| 6 | 2.067808  | 0.938397  | 1.132263  |
| 1 | 1.991771  | 1.985942  | 0.816446  |
| 1 | -1.744801 | -2.117994 | 3.453286  |
| 6 | -1.333734 | -2.000034 | 2.441568  |
| 6 | -2.191163 | -1.977192 | 1.363660  |
| 1 | -3.259044 | -2.072168 | 1.536980  |
| 8 | 2.239795  | -1.995972 | -0.521634 |
| 8 | 2.637111  | -0.857111 | -1.338186 |
| 6 | 3.967196  | -0.838620 | -1.650253 |
| 6 | 4.819444  | -1.987137 | -1.175507 |
| 8 | 4.354378  | 0.097346  | -2.316845 |
| 1 | 4.818147  | -2.049306 | -0.081705 |
| 1 | 5.834393  | -1.827083 | -1.549507 |
| 1 | 4.422094  | -2.936115 | -1.555948 |

**'Ih**

|    |          |           |           |
|----|----------|-----------|-----------|
| 1  | 1.709851 | 0.392782  | -1.154263 |
| 6  | 2.191614 | -0.456449 | -1.643614 |
| 6  | 3.611543 | -0.055613 | -2.044024 |
| 7  | 2.055700 | -1.624247 | -0.743770 |
| 27 | 0.559948 | -1.611565 | 0.513956  |
| 6  | 2.708986 | -2.720557 | -1.077544 |
| 8  | 0.351401 | -3.511902 | 0.425696  |

|   |           |           |           |
|---|-----------|-----------|-----------|
| 7 | 1.019214  | 0.130144  | 1.273731  |
| 6 | 0.131694  | 0.899462  | 1.890096  |
| 8 | -0.860715 | -1.791004 | 1.774349  |
| 6 | 2.410518  | 0.580864  | 1.407257  |
| 1 | 2.459993  | 1.678901  | 1.343049  |
| 6 | 3.013117  | 0.136292  | 2.753371  |
| 1 | 1.613811  | -0.645429 | -2.558673 |
| 1 | 3.021862  | 0.156079  | 0.609902  |
| 1 | 0.464507  | 1.903227  | 2.174282  |
| 8 | 2.336811  | 0.681412  | 3.874137  |
| 1 | 4.047112  | 0.501035  | 2.811414  |
| 1 | 3.042183  | -0.966098 | 2.794289  |
| 1 | 1.494601  | 0.204889  | 3.971630  |
| 1 | 3.573176  | 0.982364  | -2.416243 |
| 8 | 4.090696  | -0.933258 | -3.065629 |
| 1 | 4.279876  | -0.072138 | -1.165342 |
| 1 | 5.002770  | -0.674646 | -3.280566 |
| 1 | 3.489270  | -2.611125 | -1.835104 |
| 1 | 3.116870  | -4.825663 | -0.886652 |
| 6 | 2.449983  | -4.019669 | -0.595928 |
| 6 | 1.267330  | -4.331741 | 0.055024  |
| 1 | 1.045994  | -5.387156 | 0.268787  |
| 1 | -2.462316 | -1.118748 | 2.784521  |
| 6 | -1.530421 | -0.824119 | 2.283622  |
| 6 | -1.156992 | 0.513368  | 2.288123  |
| 1 | -1.818200 | 1.249754  | 2.733269  |
| 8 | -0.450166 | -1.214608 | -0.968946 |
| 8 | -1.584466 | -0.404294 | -0.650498 |
| 6 | -2.778837 | -1.103826 | -0.686358 |
| 6 | -2.729065 | -2.548816 | -1.103610 |
| 8 | -3.769321 | -0.475904 | -0.390137 |
| 1 | -2.272926 | -2.649170 | -2.094889 |
| 1 | -3.754059 | -2.928595 | -1.116943 |
| 1 | -2.111509 | -3.127823 | -0.407811 |

¶II

|    |           |           |           |
|----|-----------|-----------|-----------|
| H  | -1.791040 | 0.568972  | 0.734648  |
| C  | -1.554679 | -0.167576 | -0.040796 |
| C  | -0.447506 | 0.392961  | -0.966408 |
| N  | -1.151183 | -1.433376 | 0.578284  |
| Co | 0.198040  | -1.463428 | 2.016114  |
| C  | -1.551148 | -2.523396 | -0.030363 |
| O  | 0.331951  | -3.381120 | 2.058319  |
| N  | -1.104315 | -1.424034 | 3.438889  |
| C  | -1.282813 | -0.366897 | 4.193924  |
| O  | 0.416712  | 0.435589  | 1.952416  |
| C  | -1.821342 | -2.672168 | 3.733975  |
| H  | -1.099676 | -3.401251 | 4.133037  |
| C  | -3.038106 | -2.591930 | 4.658138  |
| H  | -2.463744 | -0.342272 | -0.635587 |
| H  | -2.171670 | -3.086873 | 2.780593  |
| H  | -1.933131 | -0.489252 | 5.062044  |
| O  | -2.752455 | -2.267801 | 6.017461  |
| H  | -3.560724 | -3.562041 | 4.590850  |
| H  | -3.737088 | -1.820116 | 4.311599  |
| H  | -2.082265 | -2.897718 | 6.335774  |
| H  | -0.890685 | 1.166224  | -1.608296 |
| O  | 0.089185  | -0.601777 | -1.825243 |
| H  | 0.336410  | 0.855094  | -0.355078 |
| H  | 0.697263  | -1.125808 | -1.272028 |
| H  | -2.244159 | -2.390809 | -0.867973 |
| H  | -1.618872 | -4.654040 | -0.323122 |
| C  | -1.183988 | -3.856700 | 0.272017  |
| C  | -0.273020 | -4.183431 | 1.257775  |
| H  | -0.025313 | -5.244134 | 1.410901  |
| H  | 0.414127  | 2.260707  | 2.783129  |
| C  | 0.060096  | 1.226991  | 2.901902  |
| C  | -0.717102 | 0.913818  | 3.996617  |
| H  | -0.944040 | 1.690569  | 4.720162  |
| O  | 1.567354  | -1.489569 | 3.308547  |
| O  | 2.850957  | -1.483644 | 2.612604  |

|   |          |           |           |
|---|----------|-----------|-----------|
| C | 2.759396 | -1.495225 | 1.313777  |
| C | 4.079905 | -1.501502 | 0.598949  |
| O | 1.665160 | -1.503169 | 0.701064  |
| H | 4.125817 | -0.638293 | -0.075519 |
| H | 4.152043 | -2.409432 | -0.012020 |
| H | 4.912387 | -1.465642 | 1.305781  |

<sup>3</sup>IIa

|    |           |           |           |
|----|-----------|-----------|-----------|
| 1  | -1.619044 | 0.451646  | 0.547028  |
| 6  | -1.380598 | -0.289692 | -0.223418 |
| 6  | -0.176090 | 0.206451  | -1.056218 |
| 7  | -1.127853 | -1.592180 | 0.407081  |
| 27 | 0.030359  | -1.722061 | 2.023102  |
| 6  | -1.525625 | -2.643035 | -0.278224 |
| 8  | -0.180701 | -3.638231 | 2.116221  |
| 7  | -1.222366 | -1.527521 | 3.647643  |
| 6  | -1.147671 | -0.483036 | 4.434287  |
| 8  | 0.432096  | 0.121471  | 1.981614  |
| 6  | -2.110318 | -2.644046 | 3.995242  |
| 1  | -1.492737 | -3.472424 | 4.377514  |
| 6  | -3.265215 | -2.373537 | 4.962168  |
| 1  | -2.255193 | -0.386533 | -0.883917 |
| 1  | -2.545892 | -3.013084 | 3.057514  |
| 1  | -1.722646 | -0.492631 | 5.364403  |
| 8  | -2.876682 | -2.110449 | 6.310139  |
| 1  | -3.949393 | -3.238879 | 4.915942  |
| 1  | -3.834019 | -1.490865 | 4.642906  |
| 1  | -2.336998 | -2.861876 | 6.612139  |
| 1  | -0.517720 | 1.045796  | -1.678799 |
| 8  | 0.330263  | -0.791609 | -1.923241 |
| 1  | 0.601546  | 0.577657  | -0.377750 |
| 1  | 0.956858  | -1.313293 | -1.384472 |
| 1  | -2.064530 | -2.444292 | -1.210240 |
| 1  | -1.726815 | -4.757981 | -0.611597 |
| 6  | -1.339824 | -3.998320 | 0.060192  |
| 6  | -0.689761 | -4.394137 | 1.215527  |

|   |           |           |           |
|---|-----------|-----------|-----------|
| 1 | -0.591697 | -5.469264 | 1.423893  |
| 1 | 0.790397  | 1.886645  | 2.860086  |
| 6 | 0.304473  | 0.911359  | 2.999127  |
| 6 | -0.378505 | 0.681434  | 4.172821  |
| 1 | -0.387940 | 1.471955  | 4.917682  |
| 8 | 1.643455  | -2.133008 | 2.862827  |
| 8 | 2.762214  | -1.365727 | 2.373600  |
| 6 | 2.800657  | -1.317501 | 1.037231  |
| 6 | 4.053101  | -0.637160 | 0.546454  |
| 8 | 1.911190  | -1.758714 | 0.316741  |
| 1 | 3.772244  | 0.251760  | -0.030981 |
| 1 | 4.584927  | -1.318574 | -0.128117 |
| 1 | 4.708794  | -0.350012 | 1.372707  |

<sup>3</sup>IIb

|    |           |           |           |
|----|-----------|-----------|-----------|
| H  | -0.022427 | -1.300604 | -2.573572 |
| C  | 0.516420  | -1.987186 | -1.911911 |
| C  | 2.044447  | -1.792366 | -2.097729 |
| N  | 0.103372  | -1.762695 | -0.522718 |
| Co | 0.095874  | 0.092302  | 0.235499  |
| C  | 0.054383  | -2.827754 | 0.238987  |
| O  | -0.325543 | -0.506564 | 2.018657  |
| N  | -1.789799 | 0.373368  | -0.138691 |
| C  | -2.153459 | 1.450179  | -0.787020 |
| O  | 0.604134  | 0.823443  | -1.449154 |
| C  | -2.785721 | -0.505853 | 0.484488  |
| H  | -2.863869 | -0.245529 | 1.551297  |
| C  | -4.178780 | -0.529910 | -0.150288 |
| H  | 0.248488  | -3.017006 | -2.191566 |
| H  | -2.386044 | -1.525478 | 0.448870  |
| H  | -3.219607 | 1.689879  | -0.802909 |
| O  | -4.942361 | 0.662945  | 0.022597  |
| H  | -4.716934 | -1.400153 | 0.262666  |
| H  | -4.101693 | -0.675304 | -1.234962 |
| H  | -5.047873 | 0.811193  | 0.978745  |
| H  | 2.339153  | -2.266358 | -3.043727 |

|   |           |           |           |
|---|-----------|-----------|-----------|
| O | 2.793126  | -2.407565 | -1.065836 |
| H | 2.265756  | -0.720144 | -2.165102 |
| H | 2.657227  | -1.830810 | -0.284670 |
| H | 0.194908  | -3.794460 | -0.256045 |
| H | -0.204154 | -3.835919 | 2.122733  |
| C | -0.170264 | -2.866303 | 1.635627  |
| C | -0.329695 | -1.733029 | 2.406242  |
| H | -0.502995 | -1.852197 | 3.485232  |
| H | 0.547589  | 2.437512  | -2.638808 |
| C | -0.001556 | 1.873376  | -1.873461 |
| C | -1.270080 | 2.295038  | -1.506223 |
| H | -1.668386 | 3.202783  | -1.948461 |
| O | 0.151571  | 1.681148  | 0.949340  |
| O | 2.350233  | 1.996624  | 0.847950  |
| C | 2.736794  | 0.817108  | 0.768194  |
| C | 4.216690  | 0.494338  | 0.918043  |
| O | 1.974961  | -0.213984 | 0.576780  |
| H | 4.516000  | -0.238535 | 0.159983  |
| H | 4.384616  | 0.045492  | 1.905635  |
| H | 4.816852  | 1.403638  | 0.831260  |

**<sup>5</sup>IIb**

|    |           |           |           |
|----|-----------|-----------|-----------|
| H  | -1.918366 | 0.476973  | 0.407086  |
| C  | -1.539778 | -0.218532 | -0.349338 |
| C  | -0.331873 | 0.427935  | -1.073142 |
| N  | -1.168439 | -1.485075 | 0.291432  |
| Co | -0.038661 | -1.494820 | 2.021234  |
| C  | -1.310584 | -2.546918 | -0.482899 |
| O  | -0.162528 | -3.535780 | 2.023902  |
| N  | -1.249630 | -1.394219 | 3.668959  |
| C  | -1.318951 | -0.335033 | 4.456928  |
| O  | 0.027653  | 0.555253  | 1.982422  |
| C  | -1.897934 | -2.638288 | 4.118004  |
| H  | -1.120106 | -3.312833 | 4.510859  |
| C  | -3.047000 | -2.538154 | 5.123937  |
| H  | -2.339089 | -0.404764 | -1.082891 |

|   |           |           |           |
|---|-----------|-----------|-----------|
| H | -2.283600 | -3.137940 | 3.221726  |
| H | -1.822401 | -0.453253 | 5.419809  |
| O | -2.665094 | -2.174840 | 6.451215  |
| H | -3.572847 | -3.508894 | 5.124894  |
| H | -3.770449 | -1.776001 | 4.807134  |
| H | -1.986319 | -2.807931 | 6.743770  |
| H | -0.709468 | 1.221189  | -1.732717 |
| O | 0.368950  | -0.497051 | -1.889091 |
| H | 0.329135  | 0.883287  | -0.326032 |
| H | 0.929079  | -1.012722 | -1.277861 |
| H | -1.773389 | -2.383248 | -1.462262 |
| H | -1.140206 | -4.630351 | -0.951608 |
| C | -0.946880 | -3.876713 | -0.192949 |
| C | -0.410470 | -4.286343 | 1.025009  |
| H | -0.204772 | -5.361301 | 1.162652  |
| H | 0.118075  | 2.366140  | 2.867639  |
| C | -0.193390 | 1.314196  | 2.980761  |
| C | -0.801489 | 0.946554  | 4.180136  |
| H | -0.925818 | 1.711411  | 4.942379  |
| O | 1.542377  | -1.551066 | 3.167819  |
| O | 2.822781  | -1.576064 | 2.518749  |
| C | 2.743033  | -1.558928 | 1.202159  |
| C | 4.087970  | -1.571110 | 0.530149  |
| O | 1.662993  | -1.537565 | 0.596800  |
| H | 4.178007  | -0.681572 | -0.104797 |
| H | 4.157145  | -2.453062 | -0.117790 |
| H | 4.899069  | -1.586068 | 1.262671  |

**7IIa**

|    |           |           |           |
|----|-----------|-----------|-----------|
| 1  | -1.824837 | 0.654231  | 0.164811  |
| 6  | -1.451840 | -0.152272 | -0.482227 |
| 6  | -0.173446 | 0.378583  | -1.186480 |
| 7  | -1.198624 | -1.335407 | 0.317723  |
| 27 | 0.033798  | -1.313950 | 2.011276  |
| 6  | -1.728481 | -2.513224 | -0.198311 |
| 8  | 0.251407  | -3.316116 | 1.961839  |



|   |           |           |           |
|---|-----------|-----------|-----------|
| 7 | -1.245111 | -1.368448 | 3.581478  |
| 6 | -1.346447 | -0.374171 | 4.448462  |
| 8 | -0.164418 | 0.740139  | 1.978295  |
| 6 | -1.879406 | -2.658704 | 3.886851  |
| 1 | -1.075149 | -3.384767 | 4.082701  |
| 6 | -2.925343 | -2.713633 | 5.000481  |
| 1 | -2.211446 | -0.371468 | -1.247320 |
| 1 | -2.357409 | -3.005781 | 2.960050  |
| 1 | -1.829981 | -0.576491 | 5.406833  |
| 8 | -2.417612 | -2.489189 | 6.315084  |
| 1 | -3.427111 | -3.694628 | 4.935541  |
| 1 | -3.694928 | -1.945921 | 4.848099  |
| 1 | -1.698746 | -3.127414 | 6.466734  |
| 1 | -0.484625 | 1.171448  | -1.881137 |
| 8 | 0.495292  | -0.608362 | -1.945253 |
| 1 | 0.487680  | 0.823358  | -0.431111 |
| 1 | 1.013600  | -1.125254 | -1.300482 |
| 1 | -2.453681 | -2.418289 | -1.006092 |
| 1 | -1.745521 | -4.613082 | -0.385457 |
| 6 | -1.301396 | -3.785651 | 0.170988  |
| 6 | -0.347517 | -4.162325 | 1.163002  |
| 1 | -0.107487 | -5.222048 | 1.293025  |
| 1 | -0.153609 | 2.502044  | 2.960713  |
| 6 | -0.369355 | 1.422691  | 3.026670  |
| 6 | -0.883631 | 0.939691  | 4.239457  |
| 1 | -1.020169 | 1.652979  | 5.048339  |
| 8 | 1.568988  | -1.130941 | 3.169040  |
| 8 | 2.843419  | -1.410969 | 2.567929  |
| 6 | 2.794166  | -1.459629 | 1.246913  |
| 6 | 4.134171  | -1.726939 | 0.621019  |
| 8 | 1.745374  | -1.310837 | 0.609405  |
| 1 | 4.328339  | -0.968964 | -0.146370 |
| 1 | 4.105306  | -2.705899 | 0.126839  |
| 1 | 4.932522  | -1.717887 | 1.367500  |

711b

|    |           |           |           |
|----|-----------|-----------|-----------|
| H  | 0.006613  | -2.118797 | -2.302520 |
| C  | 0.621433  | -2.522717 | -1.488640 |
| C  | 2.117635  | -2.198167 | -1.763919 |
| N  | 0.190927  | -1.944542 | -0.216337 |
| Co | -0.026490 | 0.128921  | -0.018560 |
| C  | 0.289629  | -2.742287 | 0.824445  |
| O  | -0.655285 | -0.150798 | 1.888382  |
| N  | -1.972180 | 0.322602  | -0.725555 |
| C  | -2.320917 | 0.906241  | -1.856703 |
| O  | 0.618693  | 0.586144  | -1.931425 |
| C  | -3.023161 | -0.137452 | 0.194493  |
| H  | -2.938373 | 0.468958  | 1.110066  |
| C  | -4.473865 | -0.164836 | -0.288092 |
| H  | 0.489728  | -3.615519 | -1.463766 |
| H  | -2.753410 | -1.157124 | 0.502834  |
| H  | -3.381375 | 1.097117  | -2.033188 |
| O  | -5.039876 | 1.113326  | -0.566524 |
| H  | -5.064084 | -0.701263 | 0.475090  |
| H  | -4.561462 | -0.735160 | -1.221903 |
| H  | -4.949435 | 1.659872  | 0.233531  |
| H  | 2.457227  | -2.845498 | -2.584296 |
| O  | 2.933854  | -2.457015 | -0.641484 |
| H  | 2.203017  | -1.153157 | -2.088071 |
| H  | 2.785315  | -1.688841 | -0.044252 |
| H  | 0.583767  | -3.781495 | 0.636140  |
| H  | 0.187615  | -3.187902 | 2.919228  |
| C  | 0.050100  | -2.404197 | 2.178525  |
| C  | -0.387211 | -1.157315 | 2.624066  |
| H  | -0.558152 | -1.029498 | 3.704923  |
| H  | 0.531834  | 1.533110  | -3.710366 |
| C  | -0.043356 | 1.154775  | -2.849911 |
| C  | -1.434801 | 1.331614  | -2.869627 |
| H  | -1.868855 | 1.821828  | -3.737558 |
| O  | 0.167701  | 1.956806  | 0.385119  |
| O  | 2.328053  | 2.194044  | 0.553152  |

|   |          |           |          |
|---|----------|-----------|----------|
| C | 2.755331 | 1.012236  | 0.600846 |
| C | 4.255131 | 0.827111  | 0.822353 |
| O | 2.052653 | -0.046360 | 0.497953 |
| H | 4.625641 | 0.043436  | 0.151606 |
| H | 4.420152 | 0.493935  | 1.855110 |
| H | 4.797123 | 1.761484  | 0.656486 |

**<sup>1</sup>Hc**

|    |           |           |           |
|----|-----------|-----------|-----------|
| 1  | 0.717453  | 2.329101  | 1.811542  |
| 6  | 0.640099  | 2.809297  | 0.828417  |
| 6  | 2.060562  | 3.132201  | 0.280843  |
| 7  | -0.134221 | 1.955486  | -0.072418 |
| 27 | 0.186261  | 0.011583  | -0.201094 |
| 6  | -1.032046 | 2.551349  | -0.812224 |
| 8  | -0.867748 | -0.220790 | -1.744359 |
| 7  | 0.487096  | -1.941358 | -0.303135 |
| 6  | 0.004567  | -2.754614 | 0.604409  |
| 8  | -1.304971 | -0.148411 | 0.974439  |
| 6  | 1.130146  | -2.534313 | -1.479376 |
| 1  | 1.875002  | -3.284064 | -1.156133 |
| 6  | 0.139418  | -3.197725 | -2.447539 |
| 1  | 0.091129  | 3.752358  | 0.962344  |
| 1  | 1.661794  | -1.739679 | -2.008931 |
| 1  | 0.259565  | -3.814066 | 0.505185  |
| 8  | -0.489803 | -4.362186 | -1.915975 |
| 1  | 0.671230  | -3.428974 | -3.387309 |
| 1  | -0.664100 | -2.491240 | -2.669338 |
| 1  | 0.185275  | -5.060795 | -1.864309 |
| 1  | 2.376016  | 4.098938  | 0.695686  |
| 8  | 2.102056  | 3.245729  | -1.122760 |
| 1  | 2.787658  | 2.386026  | 0.640448  |
| 1  | 1.979063  | 2.331450  | -1.457644 |
| 1  | -1.172091 | 3.624871  | -0.645735 |
| 1  | -2.563220 | 2.588898  | -2.325184 |
| 6  | -1.837142 | 1.963690  | -1.815336 |
| 6  | -1.683252 | 0.658011  | -2.219654 |

|   |           |           |           |
|---|-----------|-----------|-----------|
| 1 | -2.293334 | 0.283291  | -3.052484 |
| 1 | -2.260420 | -1.021855 | 2.499800  |
| 6 | -1.487586 | -1.171027 | 1.732100  |
| 6 | -0.857552 | -2.400852 | 1.666401  |
| 1 | -1.144113 | -3.169359 | 2.377833  |
| 8 | 1.752334  | 0.344160  | -1.246906 |
| 8 | 2.917422  | -0.025705 | -0.430702 |
| 6 | 2.628104  | -0.115029 | 0.845739  |
| 6 | 3.809216  | -0.402599 | 1.726228  |
| 8 | 1.470757  | 0.019689  | 1.289907  |
| 1 | 3.656814  | -1.369447 | 2.220729  |
| 1 | 3.867256  | 0.365804  | 2.505757  |
| 1 | 4.738466  | -0.420533 | 1.151527  |

**11d**

|    |           |           |           |
|----|-----------|-----------|-----------|
| 1  | 0.385909  | -2.880681 | -1.146690 |
| 6  | 0.195078  | -3.324500 | -0.161730 |
| 6  | 1.544939  | -3.505416 | 0.593520  |
| 7  | -0.772698 | -2.504447 | 0.571988  |
| 27 | -0.629626 | -0.546972 | 0.653306  |
| 6  | -1.630258 | -3.161304 | 1.317731  |
| 8  | -1.863660 | -0.340095 | 2.057961  |
| 7  | -2.052236 | -0.279000 | -0.670783 |
| 6  | -2.705975 | 0.859660  | -0.752391 |
| 8  | -0.314203 | 1.341802  | 0.858137  |
| 6  | -2.448677 | -1.396757 | -1.536367 |
| 1  | -3.047567 | -2.117723 | -0.954315 |
| 6  | -3.189949 | -1.063574 | -2.835215 |
| 1  | -0.252641 | -4.315948 | -0.324096 |
| 1  | -1.534822 | -1.929348 | -1.824789 |
| 1  | -3.574236 | 0.881721  | -1.415073 |
| 8  | -4.532235 | -0.607621 | -2.672032 |
| 1  | -3.163727 | -1.965076 | -3.472145 |
| 1  | -2.669678 | -0.263493 | -3.376203 |
| 1  | -5.015206 | -1.289096 | -2.172624 |
| 1  | 1.996755  | -4.448712 | 0.257374  |

|   |           |           |           |
|---|-----------|-----------|-----------|
| 8 | 1.388141  | -3.583393 | 1.989547  |
| 1 | 2.243639  | -2.701304 | 0.316020  |
| 1 | 1.188606  | -2.661306 | 2.266939  |
| 1 | -1.610408 | -4.253362 | 1.239626  |
| 1 | -3.253621 | -3.291806 | 2.721945  |
| 6 | -2.578628 | -2.614731 | 2.207803  |
| 6 | -2.606075 | -1.271170 | 2.533156  |
| 1 | -3.317378 | -0.924297 | 3.295271  |
| 1 | -0.943170 | 3.240085  | 0.969585  |
| 6 | -1.197312 | 2.234042  | 0.604735  |
| 6 | -2.380000 | 2.062851  | -0.092984 |
| 1 | -3.029229 | 2.920546  | -0.240367 |
| 8 | 0.826549  | -0.770079 | 1.884028  |
| 8 | 2.030814  | -0.275598 | 1.218883  |
| 6 | 1.889747  | -0.186298 | -0.077671 |
| 6 | 3.114691  | 0.292017  | -0.799504 |
| 8 | 0.821713  | -0.460923 | -0.670260 |
| 1 | 2.929867  | 1.309975  | -1.165155 |
| 1 | 3.296922  | -0.350374 | -1.667909 |
| 1 | 3.986865  | 0.295055  | -0.140925 |

**<sup>1</sup>He**

|    |           |           |           |
|----|-----------|-----------|-----------|
| 1  | 0.920629  | -2.664289 | -1.031110 |
| 6  | 0.435684  | -3.348010 | -0.328857 |
| 6  | 1.479186  | -3.888211 | 0.649530  |
| 7  | -0.655916 | -2.623593 | 0.332908  |
| 27 | -0.700101 | -0.652107 | 0.372335  |
| 6  | -1.571009 | -3.359904 | 0.923579  |
| 8  | -1.992375 | -0.600095 | 1.783317  |
| 7  | -2.079015 | -0.540298 | -0.971626 |
| 6  | -2.846356 | 0.522780  | -1.080917 |
| 8  | -0.598198 | 1.252604  | 0.627471  |
| 6  | -2.256055 | -1.662919 | -1.902520 |
| 1  | -2.806246 | -2.475730 | -1.399442 |
| 6  | -2.924239 | -1.362041 | -3.247444 |
| 1  | 0.032579  | -4.201943 | -0.896772 |

|   |           |           |           |
|---|-----------|-----------|-----------|
| 1 | -1.259277 | -2.059284 | -2.127751 |
| 1 | -3.671218 | 0.452595  | -1.793774 |
| 8 | -4.322579 | -1.081704 | -3.182916 |
| 1 | -2.734430 | -2.223984 | -3.910598 |
| 1 | -2.465453 | -0.480968 | -3.712037 |
| 1 | -4.753358 | -1.840037 | -2.751046 |
| 1 | 2.354632  | -4.236130 | 0.072624  |
| 8 | 0.904962  | -4.966627 | 1.387667  |
| 1 | 1.803177  | -3.078586 | 1.318355  |
| 1 | 1.357784  | -5.025051 | 2.243712  |
| 1 | -1.483437 | -4.442125 | 0.794148  |
| 1 | -3.332950 | -3.627489 | 2.127715  |
| 6 | -2.635392 | -2.898660 | 1.725840  |
| 6 | -2.736632 | -1.578618 | 2.137126  |
| 1 | -3.517709 | -1.314818 | 2.865860  |
| 1 | -1.434125 | 3.071285  | 0.715931  |
| 6 | -1.560244 | 2.044777  | 0.341260  |
| 6 | -2.690334 | 1.747199  | -0.402399 |
| 1 | -3.422959 | 2.528757  | -0.578746 |
| 8 | 0.612921  | -0.499391 | -0.969597 |
| 8 | 1.870235  | -0.089103 | -0.342461 |
| 6 | 1.858649  | -0.218122 | 0.961928  |
| 6 | 3.140433  | 0.200950  | 1.624331  |
| 8 | 0.871911  | -0.633810 | 1.600125  |
| 1 | 3.950598  | 0.304514  | 0.897757  |
| 1 | 3.407979  | -0.532514 | 2.392308  |
| 1 | 2.975264  | 1.164722  | 2.122505  |

**<sup>1</sup>Ir**

|    |           |           |           |
|----|-----------|-----------|-----------|
| H  | -1.287955 | -0.724555 | 2.899722  |
| C  | -0.707709 | 0.202632  | 2.901547  |
| C  | 0.794185  | -0.137974 | 3.070285  |
| N  | -0.947329 | 0.936119  | 1.651550  |
| Co | -0.797034 | 0.000679  | -0.081169 |
| C  | -0.996257 | 2.232950  | 1.755495  |
| O  | -0.905349 | 1.607879  | -1.105600 |

|    |           |           |           |
|----|-----------|-----------|-----------|
| N  | -2.684847 | -0.337838 | -0.281804 |
| C  | -3.171846 | -1.544372 | -0.307265 |
| O  | -0.481563 | -1.660379 | 0.785227  |
| C  | -3.555173 | 0.813941  | -0.570475 |
| H  | -3.290777 | 1.195710  | -1.566550 |
| C  | -5.066655 | 0.605548  | -0.465312 |
| H  | -1.037039 | 0.827872  | 3.744152  |
| H  | -3.285125 | 1.608481  | 0.135109  |
| H  | -4.218138 | -1.652321 | -0.602795 |
| O  | -5.633059 | -0.246203 | -1.459386 |
| H  | -5.535115 | 1.604276  | -0.493383 |
| H  | -5.329021 | 0.149043  | 0.497594  |
| H  | -5.393391 | 0.115532  | -2.330596 |
| H  | 0.967415  | -0.423845 | 4.115697  |
| O  | 1.637287  | 0.974059  | 2.801205  |
| H  | 1.040447  | -0.989213 | 2.426879  |
| H  | 1.628676  | 1.079272  | 1.831741  |
| H  | -0.983864 | 2.649097  | 2.769424  |
| O  | -0.492696 | -0.864310 | -1.724407 |
| O  | 0.945045  | -1.013170 | -1.897261 |
| C  | 1.660809  | -0.397630 | -0.994916 |
| O  | 1.145739  | 0.230442  | -0.035357 |
| C  | 3.681128  | -0.936145 | -2.385966 |
| C  | 5.066152  | -1.018794 | -2.514383 |
| C  | 3.124968  | -0.504798 | -1.171447 |
| C  | 5.900582  | -0.681307 | -1.445484 |
| C  | 3.950015  | -0.162463 | -0.088006 |
| C  | 5.330671  | -0.258123 | -0.241781 |
| H  | 3.029610  | -1.195484 | -3.215314 |
| H  | 5.505228  | -1.347120 | -3.454022 |
| H  | 6.981530  | -0.744633 | -1.539696 |
| Cl | 6.377262  | 0.159471  | 1.105089  |
| H  | 3.518015  | 0.159024  | 0.855723  |
| C  | -1.029106 | 3.886103  | -1.641058 |
| C  | -1.127226 | 5.209892  | -1.252817 |

|   |           |           |           |
|---|-----------|-----------|-----------|
| C | -0.987483 | 2.836261  | -0.679219 |
| C | -1.191297 | 5.571444  | 0.110498  |
| C | -1.056161 | 3.204113  | 0.703496  |
| C | -1.152995 | 4.572717  | 1.063686  |
| H | -0.973999 | 3.603920  | -2.690289 |
| H | -1.152854 | 5.987232  | -2.016073 |
| H | -1.263710 | 6.616349  | 0.402570  |
| H | -1.192602 | 4.825624  | 2.123741  |
| C | -0.603845 | -4.002021 | 0.943948  |
| C | -1.301891 | -5.184115 | 0.759104  |
| C | -1.167231 | -2.753604 | 0.569291  |
| C | -2.596845 | -5.190414 | 0.201986  |
| C | -2.484674 | -2.759060 | 0.015603  |
| C | -3.173275 | -3.984596 | -0.153210 |
| H | 0.396884  | -3.997707 | 1.370715  |
| H | -0.836485 | -6.126049 | 1.048095  |
| H | -3.133280 | -6.125692 | 0.060792  |
| H | -4.179041 | -3.959750 | -0.573362 |

### III

|    |           |           |           |
|----|-----------|-----------|-----------|
| H  | 1.711208  | -2.248261 | -0.807971 |
| C  | 1.371732  | -2.742510 | 0.104434  |
| C  | 2.599464  | -2.891642 | 1.023811  |
| N  | 0.249193  | -1.988817 | 0.675947  |
| Co | 0.122158  | -0.003916 | 0.601707  |
| C  | -0.619619 | -2.697997 | 1.361092  |
| O  | -1.323210 | 0.102849  | 1.881741  |
| N  | -1.190957 | -0.000526 | -0.827901 |
| C  | -1.856670 | 1.094160  | -1.122459 |
| O  | 0.168269  | 1.914405  | 0.805406  |
| C  | -1.435423 | -1.149784 | -1.708253 |
| H  | -2.395706 | -0.978558 | -2.214918 |
| C  | -0.335522 | -1.342157 | -2.786358 |
| H  | 1.008621  | -3.747014 | -0.172366 |
| H  | -1.536723 | -2.062017 | -1.112225 |
| H  | -2.599242 | 0.998272  | -1.920452 |



|   |           |           |           |
|---|-----------|-----------|-----------|
| O | 0.146580  | -0.121144 | -3.301251 |
| H | -0.775911 | -1.903423 | -3.622360 |
| H | 0.484532  | -1.949161 | -2.380914 |
| H | 0.736845  | 0.223403  | -2.596608 |
| H | 3.304997  | -3.579028 | 0.525448  |
| O | 2.302219  | -3.328860 | 2.349158  |
| H | 3.102000  | -1.930202 | 1.124587  |
| H | 1.992651  | -4.249483 | 2.306524  |
| H | -0.476641 | -3.785445 | 1.343443  |
| H | -2.373265 | -2.978446 | 2.566201  |
| C | -1.725986 | -2.239722 | 2.103216  |
| C | -1.983177 | -0.896127 | 2.327369  |
| H | -2.835723 | -0.628376 | 2.969634  |
| H | -0.631098 | 3.746943  | 0.666497  |
| C | -0.722316 | 2.703460  | 0.331402  |
| C | -1.730441 | 2.376706  | -0.554090 |
| H | -2.406078 | 3.155681  | -0.893253 |
| O | 1.416411  | 0.177887  | -0.790430 |
| O | 2.765625  | -0.136872 | -0.344175 |
| C | 3.557572  | 0.948084  | -0.094046 |
| C | 3.106031  | 2.287127  | -0.604690 |
| O | 4.586815  | 0.726710  | 0.517217  |
| H | 2.831082  | 2.227849  | -1.663574 |
| H | 3.918884  | 3.002926  | -0.456820 |
| H | 2.209731  | 2.600013  | -0.058169 |
| N | 1.414727  | 0.001661  | 2.080077  |
| C | 2.243847  | -0.111792 | 2.875187  |
| C | 3.349647  | -0.322691 | 3.796112  |
| H | 4.268071  | 0.048696  | 3.324490  |
| H | 3.443457  | -1.400578 | 3.978545  |
| H | 3.179548  | 0.201595  | 4.742908  |

**<sup>1</sup>IIIa**

|   |           |           |           |
|---|-----------|-----------|-----------|
| 1 | -0.236183 | -3.397345 | -0.405399 |
| 6 | -0.078141 | -3.473989 | 0.672416  |
| 6 | 1.264160  | -4.158318 | 0.927491  |

|    |           |           |           |
|----|-----------|-----------|-----------|
| 7  | -0.168547 | -2.139731 | 1.269829  |
| 27 | 0.299976  | -0.483320 | 0.274190  |
| 6  | -0.551548 | -2.095411 | 2.524541  |
| 8  | 0.441164  | 0.589646  | 1.873285  |
| 7  | 0.227286  | -1.365490 | -1.475679 |
| 6  | -0.886343 | -1.418449 | -2.169219 |
| 8  | -1.510386 | 0.016599  | 0.309563  |
| 6  | 1.450315  | -1.733421 | -2.196144 |
| 1  | 1.171640  | -2.398091 | -3.027266 |
| 6  | 2.195724  | -0.501065 | -2.775352 |
| 1  | -0.869595 | -4.118615 | 1.084650  |
| 1  | 2.118074  | -2.294556 | -1.529902 |
| 1  | -0.816252 | -1.849193 | -3.173029 |
| 8  | 1.309923  | 0.429187  | -3.349951 |
| 1  | 2.874116  | -0.856110 | -3.564237 |
| 1  | 2.807815  | -0.032634 | -1.991974 |
| 1  | 0.908005  | 0.879000  | -2.569026 |
| 1  | 1.303236  | -5.084752 | 0.326149  |
| 8  | 1.358785  | -4.446290 | 2.319615  |
| 1  | 2.081915  | -3.499690 | 0.596482  |
| 1  | 2.277066  | -4.691353 | 2.517321  |
| 1  | -0.863780 | -3.044831 | 2.970534  |
| 1  | -0.956177 | -1.093998 | 4.381980  |
| 6  | -0.577022 | -0.967506 | 3.372494  |
| 6  | -0.056355 | 0.259937  | 3.008787  |
| 1  | -0.032951 | 1.061947  | 3.761400  |
| 1  | -3.396981 | 0.035784  | -0.339421 |
| 6  | -2.380291 | -0.305691 | -0.577071 |
| 6  | -2.166188 | -0.992250 | -1.756448 |
| 1  | -3.005901 | -1.160742 | -2.423265 |
| 8  | 0.615505  | 1.145684  | -0.731116 |
| 8  | 1.849553  | 1.789269  | -0.317556 |
| 6  | 1.685035  | 2.908358  | 0.440029  |
| 6  | 0.313172  | 3.517070  | 0.515887  |
| 8  | 2.695222  | 3.348151  | 0.962612  |

|   |           |           |           |
|---|-----------|-----------|-----------|
| 1 | -0.079611 | 3.697561  | -0.491416 |
| 1 | 0.380890  | 4.454380  | 1.074477  |
| 1 | -0.370306 | 2.818439  | 1.007330  |
| 7 | 2.245506  | -0.770493 | 0.534882  |
| 6 | 3.269699  | -0.315852 | 0.826324  |
| 6 | 4.490109  | 0.395608  | 1.167563  |
| 1 | 4.245389  | 1.469803  | 1.121530  |
| 1 | 5.285876  | 0.169613  | 0.448291  |
| 1 | 4.825203  | 0.133800  | 2.177558  |

**'IIIb**

|    |           |           |           |
|----|-----------|-----------|-----------|
| 1  | -0.519613 | -2.414307 | 0.683212  |
| 6  | -0.336587 | -1.691791 | 1.486394  |
| 6  | 0.822729  | -2.210918 | 2.347866  |
| 7  | -0.115538 | -0.360802 | 0.916995  |
| 27 | 1.257074  | -0.011321 | -0.543911 |
| 6  | -0.800128 | 0.615278  | 1.459577  |
| 8  | 1.098404  | 1.906636  | -0.385843 |
| 7  | -0.061812 | -0.082990 | -1.939854 |
| 6  | -0.551124 | -1.205952 | -2.391728 |
| 8  | 1.705144  | -1.865221 | -0.657470 |
| 6  | -0.325226 | 1.167773  | -2.676184 |
| 1  | 0.592733  | 1.755642  | -2.594377 |
| 6  | -0.676944 | 1.000595  | -4.163148 |
| 1  | -1.250829 | -1.668326 | 2.105800  |
| 1  | -1.118520 | 1.742595  | -2.174056 |
| 1  | -1.295721 | -1.144577 | -3.185899 |
| 8  | 0.151986  | 0.095906  | -4.862993 |
| 1  | -0.642121 | 2.015655  | -4.601430 |
| 1  | -1.709811 | 0.644034  | -4.294925 |
| 1  | 1.044938  | 0.099158  | -4.463530 |
| 1  | 0.559514  | -3.223788 | 2.701019  |
| 8  | 1.156066  | -1.359714 | 3.446554  |
| 1  | 1.727345  | -2.287930 | 1.741930  |
| 1  | 0.376164  | -1.296975 | 4.024194  |
| 1  | -1.536162 | 0.334865  | 2.224928  |

|   |           |           |           |
|---|-----------|-----------|-----------|
| 1 | -1.358830 | 2.673443  | 1.726314  |
| 6 | -0.697110 | 1.998768  | 1.191232  |
| 6 | 0.245953  | 2.536104  | 0.334521  |
| 1 | 0.297858  | 3.631121  | 0.238719  |
| 1 | 1.344454  | -3.775644 | -1.160560 |
| 6 | 0.983641  | -2.743138 | -1.269055 |
| 6 | -0.151918 | -2.513872 | -2.013965 |
| 1 | -0.650362 | -3.356667 | -2.482517 |
| 8 | 2.598459  | 0.451208  | -1.800121 |
| 8 | 2.498720  | -0.292950 | -3.037134 |
| 6 | 3.570929  | -1.104861 | -3.294471 |
| 6 | 4.660928  | -1.161937 | -2.256251 |
| 8 | 3.558974  | -1.704817 | -4.347909 |
| 1 | 5.057685  | -0.160340 | -2.058367 |
| 1 | 5.449311  | -1.821380 | -2.629190 |
| 1 | 4.252849  | -1.540892 | -1.313278 |
| 7 | 2.623367  | 0.115025  | 0.883640  |
| 6 | 3.293400  | 0.177079  | 1.822052  |
| 6 | 4.086162  | 0.211118  | 3.042304  |
| 1 | 4.232105  | 1.246607  | 3.370894  |
| 1 | 5.065689  | -0.252051 | 2.876582  |
| 1 | 3.538428  | -0.344790 | 3.812848  |

**<sup>1</sup>Hlc**

|    |           |           |           |
|----|-----------|-----------|-----------|
| H  | -1.850704 | 1.039550  | -2.216646 |
| C  | -2.576510 | 1.132966  | -1.405927 |
| C  | -3.703687 | 0.131353  | -1.631624 |
| N  | -1.871068 | 0.939632  | -0.133099 |
| Co | -0.184617 | -0.121460 | -0.082136 |
| C  | -2.363816 | 1.549632  | 0.910933  |
| O  | 0.354906  | 0.717228  | 1.560956  |
| N  | 1.506270  | -1.182637 | -0.037283 |
| C  | 1.730428  | -2.175429 | -0.860294 |
| O  | -0.835503 | -0.985013 | -1.666471 |
| C  | 2.585728  | -0.851153 | 0.913611  |
| H  | 2.616102  | -1.616692 | 1.711117  |

|   |           |           |           |
|---|-----------|-----------|-----------|
| C | 3.985732  | -0.695793 | 0.306303  |
| H | -3.001148 | 2.147119  | -1.439930 |
| H | 2.320122  | 0.088694  | 1.393645  |
| H | 2.692511  | -2.684860 | -0.756439 |
| O | 4.636238  | -1.929454 | -0.029968 |
| H | 4.603799  | -0.119115 | 1.013952  |
| H | 3.920127  | -0.118181 | -0.619673 |
| H | 4.807522  | -2.397489 | 0.805549  |
| H | -4.080366 | 0.263166  | -2.661851 |
| O | -4.735449 | 0.390435  | -0.674971 |
| H | -3.305566 | -0.887804 | -1.535084 |
| H | -5.410263 | -0.300567 | -0.774283 |
| H | -3.311805 | 2.078847  | 0.773635  |
| H | -2.301496 | 2.136179  | 2.988759  |
| C | -1.761146 | 1.632195  | 2.192918  |
| C | -0.445978 | 1.273864  | 2.402325  |
| H | 0.014139  | 1.505788  | 3.374099  |
| H | -0.850684 | -2.367796 | -3.116438 |
| C | -0.290045 | -1.996092 | -2.245645 |
| C | 0.881349  | -2.630678 | -1.899547 |
| H | 1.216634  | -3.470377 | -2.501255 |
| O | 0.547990  | 1.190474  | -1.169370 |
| O | 1.897674  | 1.498740  | -0.759575 |
| C | 2.049937  | 2.754460  | -0.243637 |
| C | 0.865584  | 3.686257  | -0.292664 |
| O | 3.149564  | 3.034222  | 0.188809  |
| H | 0.463976  | 3.748494  | -1.309844 |
| H | 1.196303  | 4.670324  | 0.050616  |
| H | 0.059037  | 3.315397  | 0.348614  |
| N | -1.087687 | -1.537648 | 1.000263  |
| C | -1.612010 | -2.351146 | 1.631947  |
| C | -2.275610 | -3.373331 | 2.431537  |
| H | -2.577808 | -4.212214 | 1.793708  |
| H | -3.166081 | -2.952226 | 2.912919  |
| H | -1.595139 | -3.744885 | 3.206642  |

**IIIId**

|    |           |           |           |
|----|-----------|-----------|-----------|
| 1  | 0.914425  | 1.534824  | 2.827474  |
| 6  | 1.016078  | 2.210561  | 1.971488  |
| 6  | 2.485060  | 2.582375  | 1.778232  |
| 7  | 0.419154  | 1.575532  | 0.798441  |
| 27 | 0.528890  | -0.382138 | 0.554067  |
| 6  | -0.232524 | 2.347428  | -0.032399 |
| 8  | -0.719336 | -0.430006 | -0.841088 |
| 7  | 0.568356  | -2.352255 | 0.327414  |
| 6  | -0.029537 | -3.166602 | 1.156530  |
| 8  | -0.887886 | -0.431413 | 1.885806  |
| 6  | 1.239825  | -2.863935 | -0.872919 |
| 1  | 2.325229  | -2.714976 | -0.760748 |
| 6  | 0.951925  | -4.306365 | -1.283319 |
| 1  | 0.467759  | 3.131444  | 2.220933  |
| 1  | 0.945048  | -2.213895 | -1.703243 |
| 1  | 0.096390  | -4.237901 | 0.981928  |
| 8  | 1.478382  | -5.304531 | -0.402231 |
| 1  | 1.346606  | -4.445652 | -2.304107 |
| 1  | -0.128943 | -4.489822 | -1.323081 |
| 1  | 2.439242  | -5.160639 | -0.352630 |
| 1  | 2.919869  | 2.840247  | 2.761518  |
| 8  | 2.536104  | 3.703447  | 0.895418  |
| 1  | 3.033008  | 1.725219  | 1.362333  |
| 1  | 3.448132  | 3.794724  | 0.574174  |
| 1  | -0.231754 | 3.420124  | 0.187660  |
| 1  | -1.420807 | 2.685795  | -1.796474 |
| 6  | -0.955641 | 1.930136  | -1.171646 |
| 6  | -1.164872 | 0.599544  | -1.469557 |
| 1  | -1.795879 | 0.345045  | -2.331215 |
| 1  | -1.983703 | -1.328960 | 3.305392  |
| 6  | -1.249347 | -1.498695 | 2.502816  |
| 6  | -0.835922 | -2.795935 | 2.263927  |
| 1  | -1.255232 | -3.591776 | 2.873144  |
| 8  | 2.069607  | -0.164521 | -0.545473 |

|   |          |           |           |
|---|----------|-----------|-----------|
| 8 | 1.753510 | -0.094472 | -1.964942 |
| 6 | 2.408052 | 0.893002  | -2.634633 |
| 6 | 3.348551 | 1.776527  | -1.853742 |
| 8 | 2.200504 | 0.979493  | -3.827891 |
| 1 | 2.791456 | 2.365716  | -1.116098 |
| 1 | 3.850393 | 2.439063  | -2.564659 |
| 1 | 4.083074 | 1.172801  | -1.308618 |
| 7 | 1.825582 | -0.654688 | 1.997366  |
| 6 | 2.537036 | -1.014255 | 2.834264  |
| 6 | 3.428635 | -1.477738 | 3.889180  |
| 1 | 4.451809 | -1.566235 | 3.505385  |
| 1 | 3.096255 | -2.459093 | 4.248012  |
| 1 | 3.422463 | -0.772639 | 4.728729  |

**IIIe**

|    |           |           |           |
|----|-----------|-----------|-----------|
| 1  | -0.299033 | 0.430524  | -0.453803 |
| 6  | -0.874879 | 0.467225  | -1.378810 |
| 6  | 0.001702  | -0.004450 | -2.539176 |
| 7  | -2.125825 | -0.287830 | -1.151714 |
| 27 | -2.690371 | -0.716590 | 0.697440  |
| 6  | -2.975050 | -0.347756 | -2.157024 |
| 8  | -4.528485 | -0.263726 | 0.288197  |
| 7  | -0.915500 | -1.401105 | 1.295153  |
| 6  | -0.559697 | -1.409439 | 2.567827  |
| 8  | -3.435201 | -1.001520 | 2.462332  |
| 6  | 0.036430  | -2.013176 | 0.350692  |
| 1  | 0.938755  | -1.389291 | 0.230272  |
| 6  | 0.490230  | -3.430562 | 0.746518  |
| 1  | -1.112115 | 1.527561  | -1.540908 |
| 1  | -0.464019 | -2.068832 | -0.618425 |
| 1  | 0.486648  | -1.657489 | 2.786130  |
| 8  | -0.591166 | -4.324336 | 0.992542  |
| 1  | 1.161165  | -3.394230 | 1.620982  |
| 1  | 1.065617  | -3.862017 | -0.082365 |
| 1  | -1.129236 | -3.906605 | 1.689289  |
| 1  | 1.011064  | 0.418411  | -2.391963 |

|   |           |           |           |
|---|-----------|-----------|-----------|
| 8 | -0.549988 | 0.451255  | -3.777769 |
| 1 | 0.092558  | -1.103664 | -2.530643 |
| 1 | -0.003708 | 0.094779  | -4.498165 |
| 1 | -2.578625 | -0.092153 | -3.143901 |
| 1 | -4.928904 | -0.712353 | -2.985016 |
| 6 | -4.356165 | -0.621453 | -2.066475 |
| 6 | -5.039131 | -0.445444 | -0.869309 |
| 1 | -6.139111 | -0.407860 | -0.896564 |
| 1 | -3.379597 | -1.058267 | 4.463687  |
| 6 | -2.768893 | -1.081656 | 3.549481  |
| 6 | -1.391771 | -1.213763 | 3.678969  |
| 1 | -0.954185 | -1.227110 | 4.671884  |
| 8 | -2.303023 | 1.081494  | 0.963980  |
| 8 | -1.929313 | 1.418951  | 2.314127  |
| 6 | -2.888056 | 2.140991  | 2.978217  |
| 6 | -4.127398 | 2.531311  | 2.215396  |
| 8 | -2.648648 | 2.424228  | 4.133769  |
| 1 | -3.862545 | 3.118014  | 1.328212  |
| 1 | -4.761528 | 3.119792  | 2.884214  |
| 1 | -4.654869 | 1.640924  | 1.857468  |
| 7 | -3.147981 | -2.598511 | 0.191120  |
| 6 | -3.311315 | -3.713125 | -0.067246 |
| 6 | -3.462614 | -5.125875 | -0.384598 |
| 1 | -2.501174 | -5.619142 | -0.197417 |
| 1 | -3.742868 | -5.250387 | -1.437106 |
| 1 | -4.237383 | -5.577534 | 0.245898  |

**5III**

|    |           |           |           |
|----|-----------|-----------|-----------|
| H  | 1.524834  | -2.486598 | -0.742535 |
| C  | 1.236315  | -2.885941 | 0.235194  |
| C  | 2.513513  | -2.949469 | 1.092674  |
| N  | 0.175391  | -2.053257 | 0.808550  |
| Co | 0.088835  | 0.038255  | 0.459154  |
| C  | -0.679543 | -2.693249 | 1.576364  |
| O  | -1.397046 | 0.160239  | 1.840002  |
| N  | -1.275332 | 0.028651  | -1.096312 |



|   |           |           |           |
|---|-----------|-----------|-----------|
| C | -2.163705 | 0.992352  | -1.204358 |
| O | -0.056420 | 2.102162  | 0.565010  |
| C | -1.367086 | -1.048677 | -2.078636 |
| H | -2.252924 | -0.889615 | -2.712904 |
| C | -0.105750 | -1.146797 | -2.979639 |
| H | 0.856475  | -3.911662 | 0.079855  |
| H | -1.495134 | -2.004741 | -1.547978 |
| H | -2.957911 | 0.864366  | -1.951697 |
| O | 0.387437  | 0.109782  | -3.379324 |
| H | -0.386868 | -1.706373 | -3.883110 |
| H | 0.672752  | -1.725301 | -2.462982 |
| H | 0.930960  | 0.411052  | -2.617257 |
| H | 3.223268  | -3.629319 | 0.590621  |
| O | 2.289676  | -3.341501 | 2.445870  |
| H | 2.976163  | -1.963667 | 1.129883  |
| H | 2.029957  | -4.278459 | 2.453187  |
| H | -0.570489 | -3.784759 | 1.642819  |
| H | -2.339026 | -2.830048 | 2.925186  |
| C | -1.732600 | -2.143944 | 2.339778  |
| C | -1.996858 | -0.780687 | 2.451286  |
| H | -2.797438 | -0.471511 | 3.143602  |
| H | -1.245234 | 3.727143  | 0.694555  |
| C | -1.139248 | 2.699856  | 0.306403  |
| C | -2.196057 | 2.201586  | -0.476665 |
| H | -3.043359 | 2.861104  | -0.648450 |
| O | 1.523651  | 0.265147  | -0.826407 |
| O | 2.838079  | -0.193199 | -0.397217 |
| C | 3.694016  | 0.818341  | -0.074291 |
| C | 3.298951  | 2.220513  | -0.450602 |
| O | 4.723073  | 0.495259  | 0.491655  |
| H | 3.056079  | 2.278427  | -1.517841 |
| H | 4.132881  | 2.885959  | -0.212252 |
| H | 2.396655  | 2.521272  | 0.094282  |
| N | 1.532364  | 0.242926  | 2.194526  |
| C | 2.435219  | -0.010139 | 2.875902  |

|   |          |           |          |
|---|----------|-----------|----------|
| C | 3.604150 | -0.390716 | 3.655884 |
| H | 4.501432 | -0.128460 | 3.081255 |
| H | 3.576719 | -1.476554 | 3.812735 |
| H | 3.617392 | 0.124128  | 4.623093 |

**IV**

|    |           |           |           |
|----|-----------|-----------|-----------|
| H  | -1.218256 | -2.192062 | 1.671105  |
| C  | -1.028935 | -2.825016 | 0.798720  |
| C  | -2.356746 | -3.339047 | 0.209879  |
| N  | -0.225360 | -2.071482 | -0.173717 |
| Co | -0.368228 | -0.174764 | -0.303121 |
| C  | 0.556065  | -2.751041 | -0.970560 |
| O  | 1.283878  | 0.061120  | -1.242944 |
| N  | 0.519700  | 0.011363  | 1.432179  |
| C  | -0.123318 | 0.367466  | 2.515833  |
| O  | -2.130802 | -0.103923 | 0.410516  |
| C  | 1.972998  | -0.200042 | 1.474329  |
| H  | 2.466996  | 0.641688  | 0.963513  |
| C  | 2.622672  | -0.423806 | 2.841957  |
| H  | -0.439718 | -3.691092 | 1.133310  |
| H  | 2.193206  | -1.084471 | 0.864271  |
| H  | 0.472926  | 0.557791  | 3.410703  |
| O  | 2.632421  | 0.711613  | 3.705940  |
| H  | 3.650138  | -0.784849 | 2.662174  |
| H  | 2.093235  | -1.209725 | 3.395355  |
| H  | 3.085744  | 1.434276  | 3.237765  |
| H  | -2.851567 | -3.938954 | 0.988926  |
| O  | -2.139594 | -4.160308 | -0.914983 |
| H  | -3.001284 | -2.485056 | -0.034984 |
| H  | -2.127599 | -3.531779 | -1.672097 |
| H  | 0.506247  | -3.838720 | -0.878623 |
| O  | -0.306932 | 1.891628  | -0.469108 |
| O  | -2.220676 | -2.014321 | -2.585346 |
| C  | -1.894639 | -0.843364 | -2.799575 |
| O  | -1.167637 | -0.060082 | -2.056989 |
| C  | -2.377843 | -0.147234 | -4.074961 |

|   |           |           |           |
|---|-----------|-----------|-----------|
| C | 1.798604  | -0.882143 | -1.965086 |
| C | 1.478611  | -2.218868 | -1.911655 |
| C | -2.412848 | 0.248548  | 1.616206  |
| C | -1.526789 | 0.524776  | 2.638604  |
| H | -3.136838 | 0.604202  | -3.817761 |
| H | -2.820575 | -0.880404 | -4.754847 |
| H | -1.551484 | 0.375618  | -4.570841 |
| H | -1.923158 | 0.817189  | 3.606302  |
| H | -3.490466 | 0.320762  | 1.820578  |
| H | 2.017934  | -2.913472 | -2.547970 |
| H | 2.594563  | -0.551114 | -2.644837 |
| H | 0.267795  | 1.846238  | -1.260943 |
| C | -1.500592 | 2.637519  | -0.789736 |
| H | -2.063840 | 2.734293  | 0.140017  |
| H | -2.090640 | 2.104063  | -1.540426 |
| H | -1.213569 | 3.633565  | -1.148712 |

<sup>3</sup>IV

|    |           |           |           |
|----|-----------|-----------|-----------|
| H  | -0.631744 | -2.683350 | 1.692659  |
| C  | -0.626954 | -3.186720 | 0.715354  |
| C  | -2.065506 | -3.594354 | 0.340080  |
| N  | -0.024754 | -2.283656 | -0.264229 |
| Co | -0.415328 | -0.243330 | -0.248049 |
| C  | 0.663277  | -2.804786 | -1.241295 |
| O  | 1.274021  | 0.094692  | -1.157931 |
| N  | 0.383949  | -0.015803 | 1.511389  |
| C  | -0.252696 | 0.534889  | 2.516048  |
| O  | -2.187415 | -0.055748 | 0.409862  |
| C  | 1.800498  | -0.389121 | 1.642448  |
| H  | 2.400808  | 0.334787  | 1.069798  |
| C  | 2.366177  | -0.540149 | 3.055826  |
| H  | -0.018822 | -4.100358 | 0.802241  |
| H  | 1.928481  | -1.349256 | 1.128360  |
| H  | 0.330372  | 0.756078  | 3.412615  |
| O  | 2.468814  | 0.671493  | 3.801345  |
| H  | 3.352216  | -1.027289 | 2.964307  |

|   |           |           |           |
|---|-----------|-----------|-----------|
| H | 1.729392  | -1.202026 | 3.656218  |
| H | 3.013521  | 1.291206  | 3.285282  |
| H | -2.429965 | -4.278271 | 1.121875  |
| O | -2.102693 | -4.267122 | -0.896728 |
| H | -2.708144 | -2.702893 | 0.331703  |
| H | -2.240080 | -3.555197 | -1.560097 |
| H | 0.714557  | -3.897946 | -1.308799 |
| O | -0.207864 | 2.155462  | -0.391390 |
| O | -2.523122 | -1.937442 | -2.248990 |
| C | -2.064561 | -0.853697 | -2.613994 |
| O | -1.179903 | -0.115331 | -2.002099 |
| C | -2.551669 | -0.211254 | -3.913831 |
| C | 1.694199  | -0.714501 | -2.086716 |
| C | 1.416559  | -2.058878 | -2.198527 |
| C | -2.499358 | 0.490248  | 1.536399  |
| C | -1.633605 | 0.845249  | 2.549922  |
| H | -3.232680 | 0.617067  | -3.675584 |
| H | -3.090287 | -0.951299 | -4.512347 |
| H | -1.713670 | 0.202754  | -4.485934 |
| H | -2.035521 | 1.298317  | 3.451002  |
| H | -3.576458 | 0.656069  | 1.673969  |
| H | 1.895790  | -2.610148 | -3.003055 |
| H | 2.383682  | -0.262382 | -2.812862 |
| H | 0.476290  | 1.919199  | -1.049334 |
| C | -1.240136 | 2.909938  | -1.038134 |
| H | -1.981037 | 3.149759  | -0.269866 |
| H | -1.714834 | 2.322626  | -1.833241 |
| H | -0.839997 | 3.849049  | -1.447311 |

**IV**

|    |           |           |           |
|----|-----------|-----------|-----------|
| 1  | -0.913587 | -2.562954 | 1.641091  |
| 6  | -0.788597 | -3.082606 | 0.680346  |
| 6  | -2.193982 | -3.599348 | 0.236691  |
| 7  | -0.189808 | -2.179871 | -0.267913 |
| 27 | -0.533002 | -0.164323 | -0.268160 |
| 6  | 0.602936  | -2.757635 | -1.264038 |

|   |           |           |           |
|---|-----------|-----------|-----------|
| 8 | 1.234432  | 0.241877  | -1.147673 |
| 7 | 0.433875  | 0.039552  | 1.593070  |
| 6 | -0.121348 | 0.550945  | 2.668150  |
| 8 | -2.208604 | 0.010080  | 0.703122  |
| 6 | 1.858443  | -0.324421 | 1.629845  |
| 1 | 2.427837  | 0.468013  | 1.119336  |
| 6 | 2.489499  | -0.631003 | 2.989698  |
| 1 | -0.139639 | -3.960909 | 0.827731  |
| 1 | 1.970774  | -1.213569 | 0.997063  |
| 1 | 0.515683  | 0.750689  | 3.534119  |
| 8 | 2.659592  | 0.498882  | 3.846716  |
| 1 | 3.456956  | -1.128786 | 2.805147  |
| 1 | 1.863681  | -1.334532 | 3.553375  |
| 1 | 3.219190  | 1.141811  | 3.377211  |
| 1 | -2.550327 | -4.264237 | 1.037449  |
| 8 | -2.150984 | -4.330454 | -0.957707 |
| 1 | -2.870153 | -2.735696 | 0.162934  |
| 1 | -2.212604 | -3.654281 | -1.668275 |
| 1 | 0.498548  | -3.829826 | -1.417868 |
| 8 | -0.406536 | 2.129015  | -0.454612 |
| 8 | -2.426771 | -2.027923 | -2.416108 |
| 6 | -2.086756 | -0.887380 | -2.745406 |
| 8 | -1.368454 | -0.059435 | -2.037646 |
| 6 | -2.519552 | -0.316622 | -4.092740 |
| 6 | 1.831306  | -0.632076 | -1.936728 |
| 6 | 1.517970  | -2.026203 | -2.000400 |
| 6 | -2.454284 | 0.525000  | 1.852083  |
| 6 | -1.501758 | 0.845378  | 2.808025  |
| 1 | -3.127217 | 0.584509  | -3.938788 |
| 1 | -3.097867 | -1.056609 | -4.652511 |
| 1 | -1.636122 | -0.018616 | -4.671490 |
| 1 | -1.838586 | 1.267861  | 3.750777  |
| 1 | -3.516608 | 0.690672  | 2.081294  |
| 1 | 2.109860  | -2.592596 | -2.720811 |
| 1 | 2.620565  | -0.239688 | -2.583130 |

|   |           |          |           |
|---|-----------|----------|-----------|
| 1 | 0.368616  | 1.955540 | -1.031797 |
| 6 | -1.386609 | 2.884521 | -1.179917 |
| 1 | -2.237606 | 3.023811 | -0.506932 |
| 1 | -1.714005 | 2.340026 | -2.072596 |
| 1 | -0.984601 | 3.869997 | -1.453664 |

<sup>1</sup>IVr

|    |           |           |           |
|----|-----------|-----------|-----------|
| H  | 1.578153  | 1.063450  | -3.255472 |
| C  | 0.777465  | 1.767737  | -3.015264 |
| C  | -0.562417 | 1.276746  | -3.615590 |
| N  | 0.657763  | 1.905458  | -1.558719 |
| Co | 0.704725  | 0.332793  | -0.426737 |
| C  | 0.302393  | 3.077835  | -1.118300 |
| O  | 0.427537  | 1.293180  | 1.183052  |
| N  | 2.638371  | 0.489223  | -0.264150 |
| C  | 3.450308  | -0.395677 | -0.767980 |
| O  | 0.802389  | -0.848892 | -1.902351 |
| C  | 3.175695  | 1.618969  | 0.513528  |
| H  | 2.946948  | 1.449623  | 1.576044  |
| C  | 4.659177  | 1.955189  | 0.344852  |
| H  | 1.030442  | 2.750706  | -3.437593 |
| H  | 2.606506  | 2.510708  | 0.228669  |
| H  | 4.509885  | -0.296768 | -0.519419 |
| O  | 5.565818  | 0.989912  | 0.874973  |
| H  | 4.825705  | 2.942978  | 0.807155  |
| H  | 4.914427  | 2.045505  | -0.718510 |
| H  | 5.392845  | 0.912583  | 1.829327  |
| H  | -0.558024 | 1.471851  | -4.695409 |
| O  | -1.658710 | 1.986588  | -3.060151 |
| H  | -0.658412 | 0.198785  | -3.445584 |
| H  | -1.736786 | 1.640259  | -2.145921 |
| H  | 0.235332  | 3.880033  | -1.860197 |
| C  | -0.012966 | 3.461671  | 0.225078  |
| C  | 0.053486  | 2.536380  | 1.314507  |
| C  | 1.795200  | -1.658666 | -2.156908 |
| C  | 3.110359  | -1.496614 | -1.616880 |

|    |           |           |           |
|----|-----------|-----------|-----------|
| O  | 0.795781  | -1.322534 | 0.673126  |
| O  | -1.653620 | -1.733798 | 0.301297  |
| C  | -2.043839 | -0.706828 | -0.304585 |
| O  | -1.287799 | 0.269161  | -0.688930 |
| H  | -0.184252 | -1.634618 | 0.570838  |
| C  | -4.056392 | 0.156615  | -1.633934 |
| C  | -5.438391 | 0.200156  | -1.829708 |
| C  | -3.523888 | -0.593435 | -0.576770 |
| C  | -6.304672 | -0.484196 | -0.975230 |
| C  | -4.385988 | -1.303652 | 0.273705  |
| C  | -5.760444 | -1.230670 | 0.071812  |
| H  | -3.405407 | 0.686910  | -2.321799 |
| H  | -5.847318 | 0.775293  | -2.658404 |
| H  | -7.381651 | -0.446397 | -1.117120 |
| Cl | -6.840188 | -2.105292 | 1.158263  |
| H  | -3.969032 | -1.904133 | 1.075688  |
| C  | -0.271423 | 3.020845  | 2.611498  |
| C  | -0.643546 | 4.339028  | 2.809093  |
| C  | -0.709289 | 5.251352  | 1.734644  |
| C  | -0.393668 | 4.806292  | 0.465567  |
| H  | -0.224491 | 2.316926  | 3.439562  |
| H  | -0.893021 | 4.675170  | 3.815014  |
| H  | -1.006625 | 6.283427  | 1.903600  |
| H  | -0.441043 | 5.489954  | -0.382460 |
| C  | 1.579142  | -2.739684 | -3.054314 |
| C  | 2.603416  | -3.611779 | -3.379388 |
| C  | 3.899420  | -3.455216 | -2.843117 |
| C  | 4.138650  | -2.402582 | -1.981030 |
| H  | 0.578416  | -2.862866 | -3.462152 |
| H  | 5.133824  | -2.251124 | -1.562044 |
| H  | 4.694286  | -4.148014 | -3.108806 |
| H  | 2.400936  | -4.437000 | -4.061447 |
| H  | 1.565575  | -3.512201 | 1.950274  |
| C  | 2.132703  | -2.610277 | 2.227843  |
| C  | 2.625458  | -2.731835 | 3.680101  |

|   |           |           |          |
|---|-----------|-----------|----------|
| C | 1.221417  | -1.389229 | 2.055810 |
| H | 2.976021  | -2.540434 | 1.527591 |
| C | 1.450062  | -2.766458 | 4.670120 |
| C | 0.036189  | -1.431090 | 3.026660 |
| C | 0.528051  | -1.551403 | 4.480047 |
| H | 1.795300  | -0.473619 | 2.245951 |
| H | -0.574766 | -0.531009 | 2.891526 |
| H | -0.599263 | -2.295330 | 2.780638 |
| H | 1.075115  | -0.634773 | 4.756835 |
| H | -0.333753 | -1.613954 | 5.159009 |
| H | 0.870276  | -3.689358 | 4.509158 |
| H | 1.822473  | -2.805673 | 5.703826 |
| H | 3.249773  | -3.629531 | 3.790275 |
| H | 3.273113  | -1.871636 | 3.919527 |

<sup>3</sup>V

|    |           |           |           |
|----|-----------|-----------|-----------|
| H  | -1.709859 | 2.305109  | -1.419947 |
| C  | -1.290625 | 1.512451  | -2.043354 |
| C  | 0.173276  | 1.846101  | -2.402634 |
| N  | -1.391869 | 0.227159  | -1.342155 |
| Co | -1.255586 | 0.139290  | 0.641179  |
| C  | -1.432663 | -0.832866 | -2.115924 |
| O  | -1.226511 | -1.785961 | 0.652777  |
| N  | -3.227022 | 0.198467  | 0.810188  |
| C  | -3.762949 | 1.109874  | 1.581025  |
| O  | -1.130220 | 2.044143  | 0.740986  |
| C  | -4.035924 | -0.905002 | 0.281615  |
| H  | -3.893078 | -1.784927 | 0.928431  |
| C  | -5.532334 | -0.635305 | 0.094269  |
| H  | -1.872654 | 1.453605  | -2.974664 |
| H  | -3.624900 | -1.175416 | -0.696096 |
| H  | -4.820280 | 0.990673  | 1.831909  |
| O  | -6.279506 | -0.498169 | 1.301410  |
| H  | -5.939833 | -1.451482 | -0.525948 |
| H  | -5.684021 | 0.302256  | -0.454722 |
| H  | -6.202158 | -1.332763 | 1.796124  |



|   |           |           |           |
|---|-----------|-----------|-----------|
| H | 0.170751  | 2.784837  | -2.975608 |
| O | 0.758510  | 0.848497  | -3.209766 |
| H | 0.742568  | 2.016757  | -1.477518 |
| H | 1.085452  | 0.150272  | -2.597030 |
| H | -1.485721 | -0.648927 | -3.192017 |
| O | -1.196472 | 0.027484  | 2.325195  |
| O | 1.452189  | -0.881198 | -1.137682 |
| C | 1.599977  | -0.314366 | -0.048511 |
| O | 0.682274  | 0.222713  | 0.704304  |
| C | 2.987094  | -0.189781 | 0.584484  |
| C | -1.264890 | -2.551798 | -0.381016 |
| C | -1.402169 | -2.182404 | -1.702350 |
| C | -1.887652 | 2.689078  | 1.551339  |
| C | -3.092861 | 2.254207  | 2.081493  |
| H | 3.134718  | 0.808388  | 1.010501  |
| H | 3.754455  | -0.404650 | -0.164718 |
| H | 3.069747  | -0.914113 | 1.405310  |
| H | -3.631047 | 2.909547  | 2.759043  |
| H | -1.536143 | 3.702582  | 1.785964  |
| H | -1.424416 | -2.956834 | -2.462347 |
| H | -1.197051 | -3.619350 | -0.131405 |

<sup>5</sup>V

|    |           |           |           |
|----|-----------|-----------|-----------|
| H  | -1.846952 | 2.287366  | -1.175071 |
| C  | -1.364052 | 1.575219  | -1.847827 |
| C  | 0.104400  | 2.026365  | -2.120145 |
| N  | -1.383939 | 0.242721  | -1.264262 |
| Co | -1.221921 | 0.027301  | 0.797173  |
| C  | -1.488746 | -0.741215 | -2.137989 |
| O  | -1.218088 | -2.125777 | 0.488708  |
| N  | -3.211188 | 0.249460  | 0.690226  |
| C  | -3.827520 | 1.360424  | 1.048391  |
| O  | -0.927620 | 2.126139  | 1.028538  |
| C  | -3.968850 | -0.971212 | 0.423348  |
| H  | -3.665198 | -1.712113 | 1.181710  |
| C  | -5.496412 | -0.886612 | 0.359364  |

|   |           |           |           |
|---|-----------|-----------|-----------|
| H | -1.897952 | 1.573655  | -2.809127 |
| H | -3.627256 | -1.385180 | -0.538183 |
| H | -4.914650 | 1.316952  | 1.128285  |
| O | -6.131025 | -0.502394 | 1.573188  |
| H | -5.859003 | -1.870523 | 0.014243  |
| H | -5.813366 | -0.147118 | -0.387094 |
| H | -5.847166 | -1.120146 | 2.269545  |
| H | 0.044908  | 3.029948  | -2.565262 |
| O | 0.745567  | 1.176277  | -3.031509 |
| H | 0.635923  | 2.099743  | -1.162319 |
| H | 1.114799  | 0.430902  | -2.497517 |
| H | -1.619669 | -0.456100 | -3.186046 |
| O | -1.318099 | -0.219102 | 2.395071  |
| O | 1.410999  | -0.733252 | -1.200484 |
| C | 1.615809  | -0.423639 | -0.011762 |
| O | 0.741524  | -0.039770 | 0.858726  |
| C | 3.029272  | -0.493732 | 0.567472  |
| C | -1.207955 | -2.721404 | -0.609867 |
| C | -1.419114 | -2.122668 | -1.882142 |
| C | -1.860340 | 2.891865  | 1.386311  |
| C | -3.240259 | 2.593307  | 1.387420  |
| H | 3.265084  | 0.429927  | 1.108021  |
| H | 3.756778  | -0.664131 | -0.231108 |
| H | 3.080897  | -1.316249 | 1.292339  |
| H | -3.918397 | 3.384913  | 1.696169  |
| H | -1.572807 | 3.905930  | 1.715659  |
| H | -1.459508 | -2.785629 | -2.743233 |
| H | -1.038306 | -3.812270 | -0.596829 |

<sup>7</sup>V

|    |           |           |           |
|----|-----------|-----------|-----------|
| H  | -1.812204 | 2.432606  | -1.760121 |
| C  | -1.253458 | 1.703530  | -2.351367 |
| C  | 0.264308  | 2.181584  | -2.386740 |
| N  | -1.333766 | 0.404574  | -1.749100 |
| Co | -1.213539 | 0.314546  | 0.550826  |
| C  | -1.149114 | -0.593775 | -2.593533 |

|   |           |           |           |
|---|-----------|-----------|-----------|
| O | -1.090401 | -1.822930 | 0.143431  |
| N | -3.310811 | 0.298936  | 0.841593  |
| C | -3.960915 | 1.322119  | 1.375612  |
| O | -1.279865 | 2.374166  | 0.562129  |
| C | -3.974002 | -1.008772 | 0.759319  |
| H | -3.468704 | -1.681289 | 1.468971  |
| C | -5.488118 | -1.087634 | 0.969824  |
| H | -1.611004 | 1.691392  | -3.391983 |
| H | -3.759275 | -1.415285 | -0.239755 |
| H | -4.968781 | 1.148905  | 1.759593  |
| O | -5.929159 | -0.772897 | 2.286918  |
| H | -5.807441 | -2.103957 | 0.678245  |
| H | -6.009835 | -0.383815 | 0.308431  |
| H | -5.428712 | -1.328100 | 2.910307  |
| H | 0.241396  | 3.152098  | -2.903262 |
| O | 1.068360  | 1.303151  | -3.100304 |
| H | 0.589684  | 2.313658  | -1.348709 |
| H | 1.454633  | 0.651235  | -2.446072 |
| H | -1.094831 | -0.368325 | -3.663847 |
| O | -1.338952 | -0.028370 | 2.289082  |
| O | 2.026987  | -0.460811 | -1.269914 |
| C | 1.668466  | -0.365177 | -0.080846 |
| O | 0.753013  | 0.454414  | 0.337275  |
| C | 2.336471  | -1.210055 | 0.992774  |
| C | -0.963162 | -2.477346 | -0.908993 |
| C | -0.994773 | -1.947552 | -2.237534 |
| C | -2.201385 | 3.075653  | 1.071223  |
| C | -3.464330 | 2.631275  | 1.501350  |
| H | 2.793734  | -0.551863 | 1.742051  |
| H | 3.100588  | -1.857606 | 0.553085  |
| H | 1.581926  | -1.811828 | 1.514403  |
| H | -4.129033 | 3.374195  | 1.935411  |
| H | -1.996051 | 4.155871  | 1.161123  |
| H | -0.852151 | -2.659950 | -3.047564 |
| H | -0.815194 | -3.568389 | -0.821207 |

<sup>3</sup>Vr

|    |           |           |           |
|----|-----------|-----------|-----------|
| H  | -2.407767 | -0.193524 | 2.286118  |
| C  | -1.529714 | 0.365084  | 2.624221  |
| C  | -0.580956 | -0.584337 | 3.392246  |
| N  | -0.890457 | 0.993138  | 1.460660  |
| Co | -1.036231 | 0.185166  | -0.386174 |
| C  | -0.145522 | 2.030944  | 1.691923  |
| O  | -0.886531 | 1.953003  | -1.074674 |
| N  | -3.006827 | 0.378117  | -0.347748 |
| C  | -3.766786 | -0.663082 | -0.496887 |
| O  | -1.145900 | -1.513852 | 0.417961  |
| C  | -3.563548 | 1.737859  | -0.323546 |
| H  | -3.293302 | 2.228595  | -1.268179 |
| C  | -5.064118 | 1.867824  | -0.054037 |
| H  | -1.866539 | 1.157449  | 3.308177  |
| H  | -3.026551 | 2.288998  | 0.457495  |
| H  | -4.833282 | -0.488854 | -0.663782 |
| O  | -5.907120 | 1.347087  | -1.078440 |
| H  | -5.272351 | 2.936422  | 0.123324  |
| H  | -5.341477 | 1.325678  | 0.858936  |
| H  | -5.707111 | 1.824505  | -1.902668 |
| H  | -1.110226 | -0.903004 | 4.302604  |
| O  | 0.611927  | 0.063248  | 3.774104  |
| H  | -0.375722 | -1.463440 | 2.772011  |
| H  | 1.224365  | -0.100821 | 3.023528  |
| H  | -0.006699 | 2.329949  | 2.735088  |
| O  | -1.187873 | -0.445786 | -1.927877 |
| O  | 1.700050  | -0.710811 | 1.390400  |
| C  | 1.787608  | -0.463615 | 0.182887  |
| O  | 0.872379  | 0.017756  | -0.609577 |
| C  | 0.065868  | 2.768658  | -0.670785 |
| C  | 0.485114  | 2.848742  | 0.692277  |
| C  | -2.044959 | -2.392712 | 0.046734  |
| C  | -3.337407 | -2.033601 | -0.452189 |
| C  | 3.239106  | -0.531249 | -1.917093 |

|    |           |           |           |
|----|-----------|-----------|-----------|
| C  | 4.469489  | -0.774354 | -2.529224 |
| C  | 3.101388  | -0.705550 | -0.533451 |
| C  | 5.570362  | -1.188592 | -1.774877 |
| C  | 4.198306  | -1.121926 | 0.232933  |
| C  | 5.416784  | -1.357136 | -0.397046 |
| H  | 2.379766  | -0.209685 | -2.497659 |
| H  | 4.578107  | -0.642127 | -3.604384 |
| H  | 6.532498  | -1.379876 | -2.243305 |
| Cl | 6.800280  | -1.881633 | 0.564775  |
| H  | 4.077045  | -1.258333 | 1.303045  |
| C  | 0.631489  | 3.673324  | -1.600611 |
| C  | 1.576416  | 4.604800  | -1.193831 |
| C  | 1.993015  | 4.681682  | 0.148515  |
| C  | 1.436977  | 3.816324  | 1.077905  |
| H  | 0.305261  | 3.608008  | -2.635875 |
| H  | 2.006444  | 5.282662  | -1.930102 |
| H  | 2.739079  | 5.412233  | 0.452110  |
| H  | 1.737165  | 3.865684  | 2.124439  |
| C  | -4.263857 | -3.047395 | -0.790017 |
| C  | -3.938717 | -4.386108 | -0.659533 |
| C  | -2.669919 | -4.738268 | -0.154695 |
| C  | -1.744300 | -3.770951 | 0.199682  |
| H  | -5.246436 | -2.754062 | -1.158922 |
| H  | -0.763165 | -4.033310 | 0.587519  |
| H  | -2.408419 | -5.789712 | -0.044543 |
| H  | -4.654354 | -5.157307 | -0.934024 |

<sup>3</sup>VI

|    |           |           |           |
|----|-----------|-----------|-----------|
| H  | -2.241723 | -2.221930 | -0.499084 |
| C  | -1.345002 | -2.846562 | -0.556849 |
| C  | -1.116644 | -3.292603 | -2.021586 |
| N  | -0.207245 | -2.101224 | -0.007367 |
| Co | -0.153735 | -0.150661 | -0.051191 |
| C  | 0.792729  | -2.818005 | 0.452315  |
| O  | 1.037565  | -0.101547 | 1.459708  |
| N  | -1.758611 | -0.065956 | 1.093777  |

|   |           |           |           |
|---|-----------|-----------|-----------|
| C | -2.879938 | 0.437586  | 0.651736  |
| O | -1.141490 | -0.115681 | -1.648920 |
| C | -1.577736 | -0.392808 | 2.510083  |
| H | -0.867079 | 0.331428  | 2.936311  |
| C | -2.830307 | -0.476085 | 3.385429  |
| H | -1.514399 | -3.742396 | 0.058080  |
| H | -1.074483 | -1.367535 | 2.561680  |
| H | -3.661342 | 0.645568  | 1.385399  |
| O | -3.521963 | 0.755401  | 3.570810  |
| H | -2.521900 | -0.904601 | 4.354867  |
| H | -3.564588 | -1.162599 | 2.944902  |
| H | -2.885072 | 1.406722  | 3.913481  |
| H | -1.976722 | -3.918147 | -2.304216 |
| O | 0.056899  | -4.059333 | -2.162583 |
| H | -1.092155 | -2.408122 | -2.668044 |
| H | 0.756678  | -3.392884 | -2.344521 |
| H | 0.734853  | -3.899107 | 0.304445  |
| O | -0.207877 | 1.650879  | 0.053476  |
| O | 1.460757  | -1.753777 | -2.546184 |
| C | 1.905893  | -0.691892 | -2.102659 |
| O | 1.469711  | -0.000422 | -1.086315 |
| C | 3.114849  | -0.031690 | -2.767930 |
| C | 1.904927  | -1.018881 | 1.680456  |
| C | 1.897057  | -2.310126 | 1.170990  |
| C | -2.319804 | 0.389998  | -1.741137 |
| C | -3.171705 | 0.722143  | -0.705713 |
| H | 2.807286  | 0.915075  | -3.230387 |
| H | 3.525202  | -0.694642 | -3.534609 |
| H | 3.886339  | 0.200804  | -2.023843 |
| H | -4.142204 | 1.145995  | -0.943771 |
| H | -2.661899 | 0.526623  | -2.775343 |
| H | 2.685351  | -2.994962 | 1.468019  |
| H | 2.692446  | -0.737508 | 2.393111  |
| H | 0.731735  | 1.930540  | -0.025024 |
| C | 2.730773  | 3.164824  | -0.030704 |

|   |          |          |           |
|---|----------|----------|-----------|
| H | 2.888884 | 3.308387 | 1.033365  |
| H | 2.422757 | 4.004032 | -0.646097 |
| H | 2.943292 | 2.204033 | -0.487596 |

<sup>3</sup>VIr

|    |           |           |           |
|----|-----------|-----------|-----------|
| H  | 2.325969  | -1.960807 | 2.361564  |
| C  | 1.399286  | -2.543134 | 2.336668  |
| C  | 0.461286  | -2.075549 | 3.474013  |
| N  | 0.788379  | -2.404030 | 1.009184  |
| Co | 1.031630  | -0.748093 | -0.083282 |
| C  | -0.007965 | -3.354017 | 0.628389  |
| O  | 0.808205  | -1.777581 | -1.644595 |
| N  | 2.974894  | -0.993794 | -0.168916 |
| C  | 3.770462  | -0.054488 | 0.231802  |
| O  | 1.161996  | 0.270311  | 1.461816  |
| C  | 3.484786  | -2.163421 | -0.895881 |
| H  | 3.116688  | -2.087284 | -1.928132 |
| C  | 4.993458  | -2.409217 | -0.871939 |
| H  | 1.651490  | -3.600564 | 2.501617  |
| H  | 2.988577  | -3.045657 | -0.471464 |
| H  | 4.827628  | -0.127909 | -0.034307 |
| O  | 5.774699  | -1.415216 | -1.529491 |
| H  | 5.168821  | -3.405688 | -1.312306 |
| H  | 5.365676  | -2.440308 | 0.160187  |
| H  | 5.450717  | -1.336836 | -2.443983 |
| H  | 0.965683  | -2.308021 | 4.423903  |
| O  | -0.772952 | -2.756137 | 3.444479  |
| H  | 0.320324  | -0.992074 | 3.400051  |
| H  | -1.350732 | -2.184150 | 2.892297  |
| H  | -0.205024 | -4.166308 | 1.334109  |
| O  | 1.334417  | 0.716134  | -1.109066 |
| O  | -1.752464 | -0.790767 | 1.823467  |
| C  | -1.803823 | -0.364563 | 0.662934  |
| O  | -0.850233 | -0.342709 | -0.220760 |
| H  | 0.434144  | 1.059326  | -1.297165 |
| C  | -1.637829 | -3.906456 | -3.244374 |

|    |           |           |           |
|----|-----------|-----------|-----------|
| C  | -2.119064 | -4.670024 | -2.162624 |
| C  | -0.662671 | -2.939512 | -3.058933 |
| C  | -1.595320 | -4.454049 | -0.896994 |
| C  | -0.140337 | -2.675250 | -1.766218 |
| C  | -0.619474 | -3.461305 | -0.669895 |
| H  | -2.038016 | -4.076257 | -4.243076 |
| H  | -2.884934 | -5.425673 | -2.320613 |
| H  | -1.938256 | -5.050503 | -0.051790 |
| H  | -0.283154 | -2.345500 | -3.887099 |
| C  | 4.062188  | 3.146861  | 2.133376  |
| C  | 2.800657  | 3.213200  | 2.757982  |
| C  | 4.347353  | 2.082613  | 1.289820  |
| C  | 1.840447  | 2.240735  | 2.531081  |
| C  | 3.386706  | 1.086935  | 1.021342  |
| C  | 2.098239  | 1.164425  | 1.640333  |
| H  | 4.808583  | 3.915034  | 2.321402  |
| H  | 2.574647  | 4.040894  | 3.428522  |
| H  | 0.862508  | 2.280236  | 3.004455  |
| H  | 5.327189  | 2.004045  | 0.819464  |
| C  | -5.405973 | 0.792014  | 0.584614  |
| C  | -4.190670 | 0.282465  | 1.032567  |
| C  | -5.576621 | 1.219462  | -0.733818 |
| C  | -3.110861 | 0.202082  | 0.143002  |
| C  | -4.495465 | 1.130540  | -1.614645 |
| C  | -3.266987 | 0.626840  | -1.183505 |
| Cl | -6.764329 | 0.899182  | 1.705891  |
| H  | -4.058853 | -0.055195 | 2.055815  |
| H  | -2.424159 | 0.555660  | -1.864106 |
| H  | -4.618803 | 1.457418  | -2.645861 |
| H  | -6.536631 | 1.611217  | -1.060254 |
| H  | 1.586452  | 3.176757  | -2.270525 |
| C  | 0.697602  | 3.646766  | -2.727330 |
| C  | 0.900017  | 5.185842  | -2.692829 |
| C  | -0.525081 | 3.255934  | -1.954705 |
| H  | 0.649465  | 3.289950  | -3.764900 |



|   |           |          |           |
|---|-----------|----------|-----------|
| C | 0.858088  | 5.717081 | -1.250562 |
| C | -0.651771 | 3.784855 | -0.558921 |
| C | -0.444976 | 5.323855 | -0.535883 |
| H | -1.414591 | 2.912124 | -2.481644 |
| H | -1.619720 | 3.516909 | -0.116172 |
| H | 0.127930  | 3.334320 | 0.081699  |
| H | -1.296455 | 5.810148 | -1.036934 |
| H | -0.438381 | 5.684572 | 0.503408  |
| H | 1.714890  | 5.308071 | -0.689983 |
| H | 0.974894  | 6.810954 | -1.247902 |
| H | 1.854741  | 5.448602 | -3.172330 |
| H | 0.103893  | 5.668277 | -3.281356 |

**'TS1**

|    |           |           |           |
|----|-----------|-----------|-----------|
| H  | -0.028134 | -2.216103 | 0.888022  |
| C  | -0.637847 | -2.358187 | -0.010569 |
| C  | -2.125957 | -2.538857 | 0.389984  |
| N  | -0.454171 | -1.223294 | -0.920546 |
| Co | -0.608958 | 0.627134  | -0.258452 |
| C  | -0.487491 | -1.500816 | -2.201140 |
| O  | -0.425687 | 1.430652  | -1.991229 |
| N  | 1.319960  | 0.703837  | 0.054891  |
| C  | 1.832631  | 0.771463  | 1.263165  |
| O  | -0.974859 | 0.034462  | 1.525257  |
| C  | 2.207440  | 0.662721  | -1.115832 |
| H  | 2.142025  | 1.624715  | -1.648546 |
| C  | 3.679364  | 0.318670  | -0.879743 |
| H  | -0.289367 | -3.268895 | -0.520183 |
| H  | 1.805680  | -0.087025 | -1.807339 |
| H  | 2.912763  | 0.914998  | 1.337187  |
| O  | 4.431207  | 1.322587  | -0.196453 |
| H  | 4.130267  | 0.096922  | -1.861924 |
| H  | 3.770248  | -0.586434 | -0.266600 |
| H  | 4.420190  | 2.123444  | -0.748614 |
| H  | -2.254720 | -3.552306 | 0.793379  |
| O  | -2.998045 | -2.412028 | -0.718401 |

|   |           |           |           |
|---|-----------|-----------|-----------|
| H | -2.375364 | -1.816893 | 1.176991  |
| H | -2.989730 | -1.454580 | -0.931966 |
| H | -0.518997 | -2.561622 | -2.469886 |
| H | -0.492035 | -0.979679 | -4.288448 |
| C | -0.475487 | -0.582572 | -3.278088 |
| C | -0.453388 | 0.786910  | -3.103000 |
| H | -0.436702 | 1.428858  | -3.995696 |
| H | -0.668718 | 0.089660  | 3.503163  |
| C | -0.206911 | 0.272167  | 2.522441  |
| C | 1.116034  | 0.677540  | 2.476310  |
| H | 1.658569  | 0.807824  | 3.407611  |
| O | -0.985643 | 2.417018  | 0.383486  |
| O | -2.961417 | 2.079148  | 0.826183  |
| C | -3.314225 | 1.145408  | 0.077491  |
| C | -4.793771 | 0.830438  | -0.077771 |
| O | -2.510019 | 0.405348  | -0.603856 |
| H | -4.948456 | -0.252124 | 0.000577  |
| H | -5.122891 | 1.146443  | -1.076206 |
| H | -5.381785 | 1.356715  | 0.678425  |
| C | 0.683175  | 3.699665  | -0.100112 |
| H | -0.001044 | 2.929334  | 0.701350  |
| H | 0.582355  | 3.405827  | -1.139889 |
| H | 0.233842  | 4.665070  | 0.135203  |
| H | 1.674520  | 3.534693  | 0.332423  |

**<sup>1</sup>TS1r**

|    |           |           |           |
|----|-----------|-----------|-----------|
| H  | 0.754844  | 1.425259  | -3.436277 |
| C  | 0.010428  | 2.100476  | -3.005197 |
| C  | -1.412940 | 1.602426  | -3.360941 |
| N  | 0.177390  | 2.156282  | -1.549521 |
| Co | 0.429917  | 0.480909  | -0.511462 |
| C  | -0.118528 | 3.292508  | -0.990002 |
| O  | 0.462412  | 1.395812  | 1.171844  |
| N  | 2.375382  | 0.643477  | -0.704106 |
| C  | 3.082268  | -0.228281 | -1.362941 |
| O  | 0.299441  | -0.570312 | -2.091521 |

|    |           |           |           |
|----|-----------|-----------|-----------|
| C  | 3.022904  | 1.791562  | -0.049303 |
| H  | 2.695305  | 1.790026  | 0.997150  |
| C  | 4.544905  | 1.888645  | -0.110821 |
| H  | 0.159886  | 3.108912  | -3.418642 |
| H  | 2.598158  | 2.702464  | -0.493328 |
| H  | 4.170027  | -0.138979 | -1.330242 |
| O  | 5.217612  | 0.841577  | 0.594300  |
| H  | 4.830664  | 2.877398  | 0.282968  |
| H  | 4.912558  | 1.839224  | -1.142988 |
| H  | 5.087378  | 1.001123  | 1.544528  |
| H  | -1.622967 | 1.851573  | -4.408894 |
| O  | -2.399879 | 2.246546  | -2.568377 |
| H  | -1.451296 | 0.514750  | -3.236407 |
| H  | -2.289379 | 1.858558  | -1.674790 |
| H  | -0.346520 | 4.130852  | -1.657988 |
| C  | -0.191152 | 3.595649  | 0.409268  |
| C  | 0.087563  | 2.620059  | 1.419868  |
| C  | 1.196139  | -1.434298 | -2.470165 |
| C  | 2.585226  | -1.328106 | -2.133238 |
| O  | 0.527077  | -1.110956 | 0.479669  |
| O  | -1.478478 | -1.767801 | 0.107113  |
| C  | -2.083086 | -0.709420 | -0.149655 |
| O  | -1.528053 | 0.421736  | -0.436408 |
| H  | 1.559874  | -1.305482 | 0.827954  |
| C  | -4.391740 | 0.069991  | -0.915283 |
| C  | -5.782547 | -0.031370 | -0.843835 |
| C  | -3.593021 | -0.750414 | -0.107313 |
| C  | -6.390861 | -0.933152 | 0.031765  |
| C  | -4.192512 | -1.676070 | 0.760153  |
| C  | -5.580613 | -1.746672 | 0.826469  |
| H  | -3.938936 | 0.768051  | -1.613346 |
| H  | -6.402487 | 0.600536  | -1.477282 |
| H  | -7.473132 | -1.010245 | 0.097184  |
| Cl | -6.334363 | -2.894071 | 1.934066  |
| H  | -3.568773 | -2.325402 | 1.366271  |

|   |           |           |           |
|---|-----------|-----------|-----------|
| C | -0.015980 | 3.038117  | 2.777336  |
| C | -0.374786 | 4.333175  | 3.106664  |
| C | -0.648444 | 5.292502  | 2.109220  |
| C | -0.552897 | 4.913986  | 0.783617  |
| H | 0.184146  | 2.295733  | 3.547339  |
| H | -0.451494 | 4.612877  | 4.157165  |
| H | -0.933915 | 6.306392  | 2.379320  |
| H | -0.764887 | 5.634222  | -0.007363 |
| C | 0.806983  | -2.508244 | -3.318595 |
| C | 1.735537  | -3.419001 | -3.788837 |
| C | 3.104185  | -3.313243 | -3.456155 |
| C | 3.512354  | -2.270501 | -2.647108 |
| H | -0.247638 | -2.591976 | -3.570138 |
| H | 4.566346  | -2.155096 | -2.390332 |
| H | 3.822343  | -4.035495 | -3.837253 |
| H | 1.401244  | -4.236269 | -4.427312 |
| H | 2.019455  | -3.491877 | 1.565364  |
| C | 2.900352  | -2.834201 | 1.587155  |
| C | 3.827554  | -3.268145 | 2.761155  |
| C | 2.462210  | -1.415120 | 1.833053  |
| H | 3.417893  | -2.935306 | 0.626073  |
| C | 3.142004  | -3.062407 | 4.119169  |
| C | 1.743674  | -1.174813 | 3.126453  |
| C | 2.668399  | -1.612324 | 4.297372  |
| H | 3.183463  | -0.649021 | 1.532941  |
| H | 1.445531  | -0.125351 | 3.214925  |
| H | 0.827147  | -1.779845 | 3.144432  |
| H | 3.541745  | -0.942620 | 4.348378  |
| H | 2.123914  | -1.491087 | 5.243825  |
| H | 2.277006  | -3.739278 | 4.196383  |
| H | 3.830682  | -3.337199 | 4.930932  |
| H | 4.107125  | -4.320572 | 2.614414  |
| H | 4.759173  | -2.683208 | 2.721838  |

<sup>1</sup>TS4

|   |          |           |           |
|---|----------|-----------|-----------|
| H | 0.421718 | -1.314977 | -2.706081 |
|---|----------|-----------|-----------|

|    |           |           |           |
|----|-----------|-----------|-----------|
| C  | 1.383255  | -1.515289 | -2.225466 |
| C  | 2.483168  | -0.670723 | -2.884067 |
| N  | 1.264264  | -1.264106 | -0.779852 |
| Co | 0.030233  | 0.077855  | -0.101487 |
| C  | 1.999835  | -2.019777 | 0.003527  |
| O  | 0.124686  | -0.587835 | 1.705966  |
| N  | -1.535467 | -0.974645 | -0.557768 |
| C  | -2.216719 | -0.770189 | -1.657443 |
| O  | 0.086400  | 1.024560  | -1.752191 |
| C  | -2.103100 | -1.896145 | 0.446398  |
| H  | -1.682128 | -1.604640 | 1.408291  |
| C  | -3.642236 | -1.862737 | 0.561569  |
| H  | 1.620692  | -2.576872 | -2.384590 |
| H  | -1.768441 | -2.927122 | 0.244117  |
| H  | -3.131075 | -1.351600 | -1.784589 |
| O  | -4.184348 | -0.565475 | 0.536799  |
| H  | -3.892209 | -2.411033 | 1.490418  |
| H  | -4.119788 | -2.418051 | -0.259028 |
| H  | -3.625993 | 0.018708  | 1.098918  |
| H  | 2.520422  | -0.918962 | -3.952444 |
| O  | 3.777460  | -0.966141 | -2.365123 |
| H  | 2.239531  | 0.395756  | -2.786131 |
| H  | 3.835914  | -0.547589 | -1.490580 |
| H  | 2.667795  | -2.728595 | -0.496212 |
| H  | 2.699616  | -2.686275 | 1.928454  |
| C  | 2.003243  | -2.029040 | 1.416834  |
| C  | 1.049829  | -1.353514 | 2.157783  |
| H  | 1.036786  | -1.487128 | 3.248713  |
| H  | -0.642114 | 1.654389  | -3.508986 |
| C  | -0.811169 | 0.964400  | -2.670750 |
| C  | -1.907604 | 0.128530  | -2.705239 |
| H  | -2.589557 | 0.188110  | -3.547536 |
| O  | -0.877474 | 1.637441  | 0.620408  |
| O  | 1.096478  | 1.563445  | 0.575094  |
| C  | -1.462544 | 1.728700  | 1.815702  |

|   |           |          |           |
|---|-----------|----------|-----------|
| C | -0.807976 | 2.696469 | 2.773062  |
| O | -2.490770 | 1.117246 | 2.089215  |
| H | 0.175582  | 2.301445 | 3.054059  |
| H | -1.431419 | 2.826247 | 3.661589  |
| H | -0.639895 | 3.659956 | 2.278078  |
| H | 2.180901  | 1.286297 | 0.971390  |
| C | 3.266396  | 1.420666 | 0.351353  |
| H | 3.137198  | 1.498207 | -0.724176 |
| H | 3.670237  | 2.332849 | 0.794576  |
| H | 3.760015  | 0.502349 | 0.686985  |

<sup>3</sup>TS4

|    |           |           |           |
|----|-----------|-----------|-----------|
| 1  | 1.076635  | -1.069768 | -3.117839 |
| 6  | 1.898108  | -1.313687 | -2.435750 |
| 6  | 2.979819  | -0.236050 | -2.537443 |
| 7  | 1.386514  | -1.409159 | -1.063697 |
| 27 | -0.003698 | 0.017906  | -0.186569 |
| 6  | 1.701368  | -2.498129 | -0.405379 |
| 8  | 0.401955  | -0.679913 | 1.546252  |
| 7  | -1.580308 | -1.103332 | -0.429120 |
| 6  | -2.165409 | -1.251704 | -1.592941 |
| 8  | -0.208159 | 0.876373  | -1.853187 |
| 6  | -2.278171 | -1.635971 | 0.763704  |
| 1  | -1.811888 | -1.175656 | 1.634401  |
| 6  | -3.792360 | -1.333703 | 0.810830  |
| 1  | 2.322741  | -2.281327 | -2.747885 |
| 1  | -2.107953 | -2.722515 | 0.831598  |
| 1  | -3.045002 | -1.900686 | -1.625211 |
| 8  | -4.111709 | 0.000221  | 0.525689  |
| 1  | -4.134756 | -1.653691 | 1.814376  |
| 1  | -4.340209 | -1.953018 | 0.085803  |
| 1  | -3.606788 | 0.571134  | 1.158105  |
| 1  | 3.391515  | -0.219092 | -3.553965 |
| 8  | 4.075169  | -0.500268 | -1.662309 |
| 1  | 2.530829  | 0.747021  | -2.331133 |
| 1  | 3.683914  | -0.774687 | -0.812847 |

|   |           |           |           |
|---|-----------|-----------|-----------|
| 1 | 2.260867  | -3.276476 | -0.943486 |
| 1 | 1.755275  | -3.719333 | 1.365524  |
| 6 | 1.419487  | -2.770148 | 0.958026  |
| 6 | 0.855286  | -1.855957 | 1.823492  |
| 1 | 0.792231  | -2.117307 | 2.889297  |
| 1 | -0.818412 | 1.028491  | -3.753509 |
| 6 | -0.931694 | 0.451091  | -2.826148 |
| 6 | -1.819472 | -0.608420 | -2.799815 |
| 1 | -2.388020 | -0.840374 | -3.694730 |
| 8 | -1.059277 | 1.576196  | 0.776142  |
| 8 | 0.920063  | 1.697720  | 0.413401  |
| 6 | -1.418957 | 1.713200  | 2.030735  |
| 6 | -0.432575 | 2.349347  | 2.985747  |
| 8 | -2.544595 | 1.355107  | 2.406153  |
| 1 | 0.406626  | 1.660566  | 3.138759  |
| 1 | -0.923891 | 2.556190  | 3.940542  |
| 1 | -0.025820 | 3.270092  | 2.553662  |
| 1 | 2.027117  | 1.571937  | 0.686446  |
| 6 | 2.992618  | 2.164618  | 0.024479  |
| 1 | 3.601955  | 1.341049  | -0.352850 |
| 1 | 2.630797  | 2.835957  | -0.746882 |
| 1 | 3.407866  | 2.691323  | 0.889091  |

<sup>3</sup>TS5

|    |           |           |           |
|----|-----------|-----------|-----------|
| H  | 0.234942  | -1.373381 | -1.804844 |
| C  | 0.793384  | -2.022267 | -1.122106 |
| C  | 2.288206  | -1.632077 | -1.135580 |
| N  | 0.194930  | -1.958584 | 0.222174  |
| Co | -0.008269 | -0.242471 | 1.169122  |
| C  | -0.027174 | -3.116716 | 0.801966  |
| O  | -0.315126 | -1.096357 | 2.870197  |
| N  | -2.127028 | -0.057181 | 0.783503  |
| C  | -2.585241 | 0.391364  | -0.349404 |
| O  | 0.387768  | 0.788408  | -0.406699 |
| C  | -3.041961 | -0.360602 | 1.890038  |
| H  | -2.619629 | 0.117769  | 2.784849  |

|   |           |           |           |
|---|-----------|-----------|-----------|
| C | -4.512001 | 0.041270  | 1.753112  |
| H | 0.696704  | -3.054674 | -1.487432 |
| H | -2.999002 | -1.443428 | 2.084530  |
| H | -3.664564 | 0.497741  | -0.488522 |
| O | -4.717086 | 1.434935  | 1.549432  |
| H | -5.035781 | -0.316360 | 2.657542  |
| H | -4.987339 | -0.455104 | 0.897440  |
| H | -4.271852 | 1.905254  | 2.275631  |
| H | 2.696724  | -1.922627 | -2.114294 |
| O | 3.030209  | -2.303335 | -0.137698 |
| H | 2.379466  | -0.543026 | -1.033923 |
| H | 2.892034  | -1.764454 | 0.670128  |
| H | 0.141735  | -4.006485 | 0.187474  |
| H | -0.596259 | -4.382095 | 2.443835  |
| C | -0.432474 | -3.354856 | 2.132884  |
| C | -0.505751 | -2.347596 | 3.076568  |
| H | -0.732243 | -2.611212 | 4.119545  |
| H | 0.068460  | 1.492662  | -2.259167 |
| C | -0.419595 | 1.033345  | -1.386613 |
| C | -1.781966 | 0.831470  | -1.443582 |
| H | -2.297246 | 1.143542  | -2.348040 |
| O | -0.077830 | 1.273403  | 2.220545  |
| O | 2.040046  | 1.648327  | 2.722489  |
| C | 2.631881  | 0.631506  | 2.259334  |
| C | 4.115387  | 0.511687  | 2.603734  |
| O | 2.111595  | -0.290990 | 1.565202  |
| H | 4.658078  | 0.125951  | 1.734080  |
| H | 4.222565  | -0.210403 | 3.423511  |
| H | 4.530337  | 1.471969  | 2.920793  |
| H | -0.053904 | 2.359514  | 1.569782  |
| C | -0.081218 | 3.502407  | 1.025692  |
| H | -0.224611 | 4.186880  | 1.864622  |
| H | -0.919253 | 3.469767  | 0.326579  |
| H | 0.894659  | 3.589566  | 0.546727  |

<sup>5</sup>TSS



|    |           |           |           |
|----|-----------|-----------|-----------|
| 1  | 0.314234  | -1.455402 | -1.876392 |
| 6  | 0.912929  | -2.019393 | -1.154884 |
| 6  | 2.354369  | -1.468805 | -1.117086 |
| 7  | 0.253232  | -2.000542 | 0.164403  |
| 27 | -0.143921 | -0.320565 | 1.091505  |
| 6  | 0.121055  | -3.172017 | 0.746385  |
| 8  | -0.437245 | -1.189992 | 2.792489  |
| 7  | -2.238136 | -0.320436 | 0.629426  |
| 6  | -2.674261 | -0.120168 | -0.585657 |
| 8  | 0.157594  | 0.759731  | -0.507960 |
| 6  | -3.252146 | -0.487082 | 1.676369  |
| 1  | -2.760306 | -0.920637 | 2.551308  |
| 6  | -3.939073 | 0.829292  | 2.080747  |
| 1  | 0.947440  | -3.062853 | -1.497950 |
| 1  | -4.035009 | -1.190005 | 1.344449  |
| 1  | -3.750824 | -0.247095 | -0.775922 |
| 8  | -3.063431 | 1.874635  | 2.447022  |
| 1  | -4.635875 | 0.590202  | 2.906182  |
| 1  | -4.551153 | 1.192244  | 1.239773  |
| 1  | -2.179971 | 1.509605  | 2.665612  |
| 1  | 2.825794  | -1.715185 | -2.079567 |
| 8  | 3.125642  | -2.055886 | -0.089793 |
| 1  | 2.325590  | -0.375721 | -1.018176 |
| 1  | 2.902104  | -1.529330 | 0.707381  |
| 1  | 0.400452  | -4.042015 | 0.144988  |
| 1  | -0.394028 | -4.486589 | 2.365313  |
| 6  | -0.313787 | -3.448000 | 2.059559  |
| 6  | -0.524409 | -2.454127 | 2.995236  |
| 1  | -0.776361 | -2.737414 | 4.026908  |
| 1  | -0.138109 | 1.287400  | -2.424895 |
| 6  | -0.594826 | 0.796323  | -1.551852 |
| 6  | -1.890506 | 0.324518  | -1.681432 |
| 1  | -2.381129 | 0.447218  | -2.643073 |
| 8  | -0.407137 | 1.192736  | 2.130933  |
| 8  | 1.612537  | 1.624205  | 2.900830  |

|   |           |           |          |
|---|-----------|-----------|----------|
| 6 | 2.322496  | 0.723845  | 2.377082 |
| 6 | 3.785261  | 0.672371  | 2.809562 |
| 8 | 1.930221  | -0.151969 | 1.541798 |
| 1 | 4.413349  | 0.429196  | 1.945775 |
| 1 | 3.900039  | -0.127877 | 3.552315 |
| 1 | 4.098726  | 1.618617  | 3.258152 |
| 1 | -0.308752 | 2.250034  | 1.532733 |
| 6 | -0.329312 | 3.469670  | 1.049866 |
| 1 | 0.097402  | 4.047613  | 1.870731 |
| 1 | -1.395338 | 3.627711  | 0.880330 |
| 1 | 0.289286  | 3.414394  | 0.154632 |

<sup>7</sup>TS5

|    |           |           |           |
|----|-----------|-----------|-----------|
| H  | -0.069534 | -2.173463 | -1.431407 |
| C  | 0.515436  | -2.598506 | -0.605872 |
| C  | 2.016756  | -2.279986 | -0.837998 |
| N  | 0.037595  | -2.042983 | 0.662190  |
| Co | -0.126609 | 0.022173  | 0.893869  |
| C  | 0.009205  | -2.886612 | 1.671364  |
| O  | -0.735277 | -0.260141 | 2.802237  |
| N  | -2.056369 | 0.319959  | 0.234919  |
| C  | -2.377291 | 1.068689  | -0.805732 |
| O  | 0.482162  | 0.454975  | -0.997910 |
| C  | -3.134897 | -0.226854 | 1.073097  |
| H  | -3.226568 | 0.397747  | 1.976695  |
| C  | -4.514801 | -0.420129 | 0.438389  |
| H  | 0.374478  | -3.690602 | -0.604461 |
| H  | -2.794066 | -1.207342 | 1.429052  |
| H  | -3.432796 | 1.314948  | -0.949099 |
| O  | -5.232368 | 0.784425  | 0.170565  |
| H  | -5.099331 | -1.081396 | 1.101431  |
| H  | -4.421119 | -0.928269 | -0.529687 |
| H  | -5.328516 | 1.262813  | 1.012503  |
| H  | 2.379496  | -2.924110 | -1.650794 |
| O  | 2.807538  | -2.544593 | 0.304022  |
| H  | 2.109949  | -1.233939 | -1.156562 |

|   |           |           |           |
|---|-----------|-----------|-----------|
| H | 2.619210  | -1.795650 | 0.912503  |
| H | 0.250997  | -3.934434 | 1.454748  |
| H | -0.282268 | -3.416680 | 3.728812  |
| C | -0.305561 | -2.594075 | 3.018895  |
| C | -0.637535 | -1.330663 | 3.494309  |
| H | -0.859883 | -1.230804 | 4.569444  |
| H | 0.479764  | 1.607404  | -2.654457 |
| C | -0.121686 | 1.218437  | -1.817519 |
| C | -1.472893 | 1.568135  | -1.763674 |
| H | -1.868314 | 2.207907  | -2.548156 |
| O | 0.093427  | 1.983986  | 1.262679  |
| O | 2.280712  | 2.114888  | 1.250745  |
| C | 2.670456  | 0.923714  | 1.343090  |
| C | 4.174680  | 0.679833  | 1.422589  |
| O | 1.920760  | -0.110104 | 1.396779  |
| H | 4.432156  | -0.190132 | 0.807695  |
| H | 4.442206  | 0.448345  | 2.461951  |
| H | 4.733673  | 1.561443  | 1.098579  |
| H | 0.150584  | 2.242079  | 2.419291  |
| C | 0.256142  | 2.577203  | 3.713435  |
| H | -0.776416 | 2.619126  | 4.062356  |
| H | 0.767214  | 3.539376  | 3.658612  |
| H | 0.844215  | 1.766325  | 4.141643  |

<sup>3</sup>TS2

|    |           |           |           |
|----|-----------|-----------|-----------|
| H  | -1.370823 | -2.404462 | -0.942287 |
| C  | -0.427252 | -2.931069 | -0.771863 |
| C  | 0.043867  | -3.590936 | -2.088503 |
| N  | 0.554413  | -1.989204 | -0.218527 |
| Co | 0.450414  | -0.074746 | -0.578090 |
| C  | 1.528015  | -2.512484 | 0.490777  |
| O  | 1.411488  | 0.341061  | 1.037421  |
| N  | -1.305398 | -0.020989 | 0.345633  |
| C  | -2.420636 | 0.174654  | -0.309557 |
| O  | -0.309034 | -0.397957 | -2.280689 |
| C  | -1.279337 | -0.036731 | 1.810562  |

|   |           |           |           |
|---|-----------|-----------|-----------|
| H | -0.783199 | 0.881907  | 2.159294  |
| C | -2.613800 | -0.216034 | 2.539627  |
| H | -0.611067 | -3.723111 | -0.031363 |
| H | -0.626719 | -0.862853 | 2.120846  |
| H | -3.318781 | 0.364560  | 0.282096  |
| O | -3.531648 | 0.864990  | 2.402101  |
| H | -2.380949 | -0.400847 | 3.602666  |
| H | -3.142399 | -1.100809 | 2.162853  |
| H | -3.081533 | 1.676680  | 2.694833  |
| H | -0.713394 | -4.341307 | -2.361527 |
| O | 1.283390  | -4.245045 | -1.937328 |
| H | 0.091630  | -2.830819 | -2.876531 |
| H | 1.944887  | -3.548888 | -2.148138 |
| H | 1.575799  | -3.603492 | 0.528760  |
| O | 0.180282  | 1.669010  | -0.799913 |
| O | 2.500762  | -1.894030 | -2.567663 |
| C | 2.801105  | -0.742864 | -2.241221 |
| O | 2.182942  | 0.049300  | -1.410437 |
| C | 4.040750  | -0.074583 | -2.840444 |
| C | 2.310037  | -0.438093 | 1.519485  |
| C | 2.474680  | -1.786892 | 1.247266  |
| C | -1.535440 | -0.153744 | -2.579273 |
| C | -2.569040 | 0.154270  | -1.716857 |
| H | 3.730661  | 0.755490  | -3.488208 |
| H | 4.607883  | -0.802404 | -3.427392 |
| H | 4.674597  | 0.343864  | -2.049373 |
| H | -3.556259 | 0.334743  | -2.130168 |
| H | -1.749794 | -0.237948 | -3.653066 |
| H | 3.262205  | -2.332222 | 1.758036  |
| H | 2.965631  | 0.034176  | 2.264206  |
| H | 1.160384  | 2.289831  | -0.569935 |
| C | 2.221711  | 3.095723  | -0.361647 |
| H | 2.211793  | 3.262935  | 0.716046  |
| H | 1.988189  | 3.973770  | -0.966331 |
| H | 3.039778  | 2.478208  | -0.728672 |

**<sup>5</sup>TS2**

|    |           |           |           |
|----|-----------|-----------|-----------|
| 1  | -1.240042 | -2.413225 | -1.562790 |
| 6  | -0.331908 | -2.920655 | -1.225997 |
| 6  | 0.560583  | -3.262622 | -2.458597 |
| 7  | 0.388659  | -2.078806 | -0.282817 |
| 27 | 0.383031  | -0.028258 | -0.571998 |
| 6  | 0.982646  | -2.734190 | 0.697553  |
| 8  | 1.761338  | 0.102167  | 1.147542  |
| 7  | -1.319672 | -0.137760 | 0.443621  |
| 6  | -2.507216 | -0.076681 | -0.120405 |
| 8  | -0.610924 | -0.239648 | -2.442429 |
| 6  | -1.168421 | -0.073970 | 1.895186  |
| 1  | -0.527878 | 0.797222  | 2.107128  |
| 6  | -2.428318 | -0.010915 | 2.761449  |
| 1  | -0.612583 | -3.868773 | -0.744985 |
| 1  | -0.587131 | -0.951331 | 2.222851  |
| 1  | -3.369169 | 0.008204  | 0.542474  |
| 8  | -3.251121 | 1.126956  | 2.536748  |
| 1  | -2.097172 | -0.064585 | 3.813670  |
| 1  | -3.072009 | -0.882128 | 2.583719  |
| 1  | -2.688800 | 1.919113  | 2.596178  |
| 1  | -0.045732 | -3.906381 | -3.111936 |
| 8  | 1.710797  | -3.971816 | -2.084982 |
| 1  | 0.791717  | -2.336449 | -3.000262 |
| 1  | 2.377408  | -3.289027 | -1.832318 |
| 1  | 0.821563  | -3.815954 | 0.733747  |
| 8  | 0.166162  | 1.697426  | -0.478757 |
| 8  | 3.104365  | -1.753654 | -1.332600 |
| 6  | 2.976437  | -0.616074 | -1.821110 |
| 8  | 1.982027  | 0.192901  | -1.655689 |
| 6  | 4.071169  | -0.041248 | -2.720263 |
| 6  | 2.221646  | -0.848271 | 1.813179  |
| 6  | 1.825462  | -2.209283 | 1.693528  |
| 6  | -1.858845 | -0.097062 | -2.550636 |
| 6  | -2.798095 | -0.061964 | -1.500398 |

|   |           |           |           |
|---|-----------|-----------|-----------|
| 1 | 3.655186  | 0.192173  | -3.708283 |
| 1 | 4.891674  | -0.756576 | -2.823629 |
| 1 | 4.447213  | 0.897999  | -2.296332 |
| 1 | -3.845994 | 0.031293  | -1.774442 |
| 1 | -2.261265 | -0.003139 | -3.575025 |
| 1 | 2.267354  | -2.919568 | 2.388652  |
| 1 | 2.994621  | -0.622277 | 2.569815  |
| 1 | 1.101733  | 2.302051  | -0.799634 |
| 6 | 2.125779  | 3.178933  | -1.079293 |
| 1 | 2.924660  | 2.831200  | -0.424388 |
| 1 | 1.701600  | 4.149758  | -0.817336 |
| 1 | 2.298257  | 3.015502  | -2.142205 |

**<sup>7</sup>TS2**

|    |           |           |           |
|----|-----------|-----------|-----------|
| H  | -1.225018 | -2.736279 | -0.887784 |
| C  | -0.256600 | -3.183443 | -0.640272 |
| C  | 0.460391  | -3.577892 | -2.000288 |
| N  | 0.538181  | -2.246925 | 0.104259  |
| Co | 0.515729  | -0.038254 | -0.526969 |
| C  | 1.508844  | -2.788862 | 0.811374  |
| O  | 1.577806  | 0.158560  | 1.393319  |
| N  | -1.407189 | 0.043354  | 0.283787  |
| C  | -2.483142 | 0.232964  | -0.446996 |
| O  | -0.275991 | -0.464334 | -2.319344 |
| C  | -1.488698 | 0.160140  | 1.743475  |
| H  | -1.007635 | 1.108555  | 2.034700  |
| C  | -2.859154 | 0.055183  | 2.416927  |
| H  | -0.407482 | -4.113676 | -0.071793 |
| H  | -0.853550 | -0.632247 | 2.164385  |
| H  | -3.413343 | 0.499623  | 0.061829  |
| O  | -3.744401 | 1.142455  | 2.157940  |
| H  | -2.689223 | -0.061671 | 3.502040  |
| H  | -3.388348 | -0.842779 | 2.072629  |
| H  | -3.277940 | 1.964624  | 2.389345  |
| H  | -0.171418 | -4.372518 | -2.426715 |
| O  | 1.751272  | -4.053405 | -1.799327 |

|   |           |           |           |
|---|-----------|-----------|-----------|
| H | 0.442378  | -2.702207 | -2.657379 |
| H | 2.358973  | -3.302121 | -2.065918 |
| H | 1.614032  | -3.878378 | 0.813452  |
| O | 0.475812  | 1.795549  | -0.596822 |
| O | 2.994762  | -1.918520 | -2.822811 |
| C | 2.764798  | -0.766703 | -2.413290 |
| O | 2.327680  | -0.497042 | -1.217115 |
| C | 3.020430  | 0.421990  | -3.326580 |
| C | 2.398195  | -0.654074 | 1.855654  |
| C | 2.436446  | -2.063154 | 1.585831  |
| C | -1.482679 | -0.227848 | -2.679281 |
| C | -2.547504 | 0.121779  | -1.857589 |
| H | 2.058699  | 0.894346  | -3.566033 |
| H | 3.511331  | 0.100301  | -4.249464 |
| H | 3.634620  | 1.174683  | -2.817634 |
| H | -3.512940 | 0.291010  | -2.327400 |
| H | -1.683289 | -0.336668 | -3.756755 |
| H | 3.217433  | -2.630867 | 2.088158  |
| H | 3.153100  | -0.277467 | 2.569375  |
| H | 1.550554  | 2.271456  | -0.406817 |
| C | 2.768874  | 2.772726  | -0.172953 |
| H | 2.734336  | 3.075056  | 0.875005  |
| H | 2.842490  | 3.602035  | -0.879432 |
| H | 3.429171  | 1.931558  | -0.383218 |

<sup>3</sup>TS2r

|    |          |           |           |
|----|----------|-----------|-----------|
| H  | 2.742488 | -1.438624 | 2.263642  |
| C  | 1.882186 | -2.113294 | 2.319752  |
| C  | 0.983277 | -1.704941 | 3.509494  |
| N  | 1.175615 | -2.085702 | 1.032942  |
| Co | 1.192721 | -0.443244 | -0.139782 |
| C  | 0.461384 | -3.126128 | 0.734166  |
| O  | 0.998664 | -1.590807 | -1.638167 |
| N  | 3.151379 | -0.552740 | -0.319398 |
| C  | 3.901118 | 0.439282  | 0.045111  |
| O  | 1.326894 | 0.625447  | 1.387145  |

|    |           |           |           |
|----|-----------|-----------|-----------|
| C  | 3.714108  | -1.703428 | -1.039891 |
| H  | 3.351891  | -1.655443 | -2.075539 |
| C  | 5.232568  | -1.879852 | -1.003334 |
| H  | 2.254993  | -3.133154 | 2.493356  |
| H  | 3.255396  | -2.602535 | -0.610952 |
| H  | 4.952009  | 0.421617  | -0.254813 |
| O  | 5.973542  | -0.867874 | -1.681610 |
| H  | 5.455675  | -2.877061 | -1.419405 |
| H  | 5.599318  | -1.869030 | 0.031007  |
| H  | 5.664058  | -0.840124 | -2.603982 |
| H  | 1.567128  | -1.871687 | 4.427282  |
| O  | -0.186557 | -2.490291 | 3.575647  |
| H  | 0.741847  | -0.640221 | 3.427543  |
| H  | -0.848094 | -1.980477 | 3.057675  |
| H  | 0.393691  | -3.925004 | 1.478899  |
| O  | 1.338463  | 0.951382  | -1.204979 |
| O  | -1.411328 | -0.625559 | 2.002363  |
| C  | -1.606958 | -0.396500 | 0.801899  |
| O  | -0.729545 | -0.284524 | -0.149259 |
| C  | 0.114134  | -2.563075 | -1.664005 |
| C  | -0.216947 | -3.346844 | -0.515489 |
| C  | 2.217210  | 1.576989  | 1.505392  |
| C  | 3.478770  | 1.568300  | 0.830133  |
| H  | 0.267526  | 1.605341  | -1.383634 |
| C  | -3.364358 | -0.245666 | -1.048009 |
| C  | -4.692622 | -0.082774 | -1.445726 |
| C  | -3.030842 | -0.203869 | 0.312983  |
| C  | -5.697376 | 0.132533  | -0.498920 |
| C  | -4.033667 | -0.003827 | 1.271314  |
| C  | -5.350090 | 0.169607  | 0.853317  |
| H  | -2.581434 | -0.425240 | -1.778954 |
| H  | -4.954441 | -0.125381 | -2.501723 |
| H  | -6.733505 | 0.264947  | -0.799515 |
| Cl | -6.611790 | 0.437405  | 2.057301  |
| H  | -3.766396 | 0.008572  | 2.323531  |



|   |           |           |           |
|---|-----------|-----------|-----------|
| C | -0.478365 | -2.913618 | -2.902862 |
| C | -1.370142 | -3.973315 | -2.988584 |
| C | -1.703176 | -4.738439 | -1.855105 |
| C | -1.114170 | -4.429156 | -0.638919 |
| H | -0.213991 | -2.320746 | -3.775679 |
| H | -1.820741 | -4.212993 | -3.951134 |
| H | -2.405833 | -5.564578 | -1.934402 |
| H | -1.343431 | -5.019330 | 0.248389  |
| C | 4.389634  | 2.627490  | 1.038813  |
| C | 4.080891  | 3.685705  | 1.877711  |
| C | 2.845506  | 3.685248  | 2.557010  |
| C | 1.935999  | 2.654466  | 2.387685  |
| H | 5.349929  | 2.597688  | 0.524290  |
| H | 0.980758  | 2.643822  | 2.906786  |
| H | 2.599024  | 4.508731  | 3.225893  |
| H | 4.786919  | 4.500190  | 2.021441  |
| H | 0.869333  | 3.709722  | -2.550426 |
| C | -0.094710 | 3.267196  | -2.846112 |
| C | -1.079852 | 4.407247  | -3.205284 |
| C | -0.649869 | 2.447503  | -1.696495 |
| H | 0.096046  | 2.634904  | -3.723580 |
| C | -1.415227 | 5.261345  | -1.972982 |
| C | -0.972415 | 3.260284  | -0.458148 |
| C | -1.956479 | 4.401245  | -0.820622 |
| H | -1.465833 | 1.776763  | -1.992852 |
| H | -1.398536 | 2.621730  | 0.325013  |
| H | -0.048458 | 3.701900  | -0.053261 |
| H | -2.923406 | 3.962820  | -1.112734 |
| H | -2.146288 | 5.019303  | 0.068783  |
| H | -0.505813 | 5.786267  | -1.637999 |
| H | -2.145543 | 6.039121  | -2.240005 |
| H | -0.649989 | 5.029160  | -4.003963 |
| H | -2.006498 | 3.969355  | -3.608693 |

<sup>3</sup>TS3

|   |           |           |          |
|---|-----------|-----------|----------|
| H | -1.562631 | -3.272516 | 0.589471 |
|---|-----------|-----------|----------|

|    |           |           |           |
|----|-----------|-----------|-----------|
| C  | -1.448903 | -3.585755 | -0.453984 |
| C  | -2.814436 | -4.062362 | -1.005082 |
| N  | -0.893999 | -2.471462 | -1.226544 |
| Co | -1.237766 | -0.575476 | -0.715198 |
| C  | -0.254142 | -2.777765 | -2.327872 |
| O  | 0.389262  | -0.042989 | -1.568874 |
| N  | -0.334357 | -0.831450 | 1.016883  |
| C  | -0.981164 | -0.719258 | 2.145133  |
| O  | -2.930456 | -1.018063 | -0.019801 |
| C  | 1.123871  | -0.977910 | 0.988913  |
| H  | 1.551448  | -0.043727 | 0.594676  |
| C  | 1.822633  | -1.367670 | 2.292917  |
| H  | -0.745473 | -4.431039 | -0.481986 |
| H  | 1.360932  | -1.748707 | 0.244181  |
| H  | -0.388419 | -0.682913 | 3.061791  |
| O  | 1.768151  | -0.385778 | 3.324987  |
| H  | 2.868328  | -1.616172 | 2.041870  |
| H  | 1.367275  | -2.269738 | 2.721202  |
| H  | 2.140042  | 0.439898  | 2.968439  |
| H  | -3.106826 | -4.950028 | -0.424163 |
| O  | -2.735375 | -4.426436 | -2.364022 |
| H  | -3.560236 | -3.274540 | -0.848084 |
| H  | -2.919998 | -3.591390 | -2.849422 |
| H  | -0.241220 | -3.829719 | -2.625738 |
| O  | -1.460887 | 1.163730  | -0.194928 |
| O  | -3.263458 | -1.849662 | -3.120668 |
| C  | -2.942420 | -0.659720 | -3.141124 |
| O  | -2.093657 | -0.043242 | -2.362974 |
| C  | -3.570837 | 0.289292  | -4.162255 |
| C  | 0.799635  | -0.595088 | -2.656423 |
| C  | 0.476150  | -1.858581 | -3.120092 |
| C  | -3.248135 | -0.871806 | 1.220315  |
| C  | -2.392574 | -0.667514 | 2.281703  |
| H  | -4.281414 | 0.951744  | -3.650142 |
| H  | -4.103003 | -0.285400 | -4.925462 |

|   |           |           |           |
|---|-----------|-----------|-----------|
| H | -2.807071 | 0.922696  | -4.627753 |
| H | -2.808943 | -0.567790 | 3.279246  |
| H | -4.325738 | -0.957189 | 1.412367  |
| H | 0.935890  | -2.211896 | -4.038056 |
| H | 1.531734  | 0.002726  | -3.216437 |
| H | -1.739995 | 1.560990  | -1.045560 |
| C | -1.632068 | 3.499053  | 0.734708  |
| H | -1.765304 | 3.047350  | 1.709385  |
| H | -2.501731 | 3.792796  | 0.156669  |
| H | -0.639408 | 3.768773  | 0.393540  |

<sup>3</sup>TS3r

|    |           |           |          |
|----|-----------|-----------|----------|
| H  | 0.963794  | 2.442267  | 2.579579 |
| C  | 0.076878  | 1.956577  | 3.000139 |
| C  | -1.155133 | 2.872189  | 2.809867 |
| N  | -0.094005 | 0.647584  | 2.361210 |
| Co | 0.503255  | 0.319103  | 0.449174 |
| C  | -0.766466 | -0.243888 | 3.017780 |
| O  | 0.738013  | -1.501879 | 0.903072 |
| N  | 2.380367  | 0.708340  | 0.893543 |
| C  | 3.017963  | 1.669789  | 0.304883 |
| O  | 0.160935  | 2.088947  | 0.015871 |
| C  | 3.080341  | -0.246278 | 1.763028 |
| H  | 2.931273  | -1.241858 | 1.326635 |
| C  | 4.564012  | -0.002610 | 2.039046 |
| H  | 0.242715  | 1.808247  | 4.077135 |
| H  | 2.546059  | -0.263361 | 2.723032 |
| H  | 4.101519  | 1.718842  | 0.426791 |
| O  | 5.398467  | -0.068070 | 0.886508 |
| H  | 4.875994  | -0.737617 | 2.800553 |
| H  | 4.730006  | 0.994156  | 2.467832 |
| H  | 5.272911  | -0.939648 | 0.470859 |
| H  | -0.977140 | 3.782099  | 3.402113 |
| O  | -2.337114 | 2.260697  | 3.275623 |
| H  | -1.238831 | 3.146341  | 1.752556 |
| H  | -2.695002 | 1.793629  | 2.488948 |

|   |           |           |           |
|---|-----------|-----------|-----------|
| H | -1.190100 | 0.043955  | 3.985100  |
| O | 1.130616  | -0.031647 | -1.234264 |
| O | -2.744138 | 1.188025  | 0.787904  |
| C | -2.412896 | 0.342848  | -0.050926 |
| O | -1.234927 | -0.182449 | -0.230246 |
| H | 0.306483  | -0.326056 | -1.672222 |
| C | 2.774377  | 4.695852  | -1.867985 |
| C | 1.378843  | 4.874461  | -1.933648 |
| C | 3.285664  | 3.626869  | -1.148434 |
| C | 0.514682  | 3.995215  | -1.300017 |
| C | 2.432811  | 2.705987  | -0.503325 |
| C | 1.017916  | 2.881318  | -0.581097 |
| H | 3.442113  | 5.392770  | -2.368965 |
| H | 0.969100  | 5.714862  | -2.492112 |
| H | -0.564201 | 4.121962  | -1.345692 |
| H | 4.363222  | 3.482160  | -1.072568 |
| C | -0.179119 | -2.181964 | 1.561055  |
| C | -0.972881 | -1.607580 | 2.601561  |
| C | -0.330021 | -3.564240 | 1.290110  |
| C | -1.878858 | -2.418102 | 3.316966  |
| C | -1.244796 | -4.330440 | 1.997676  |
| C | -2.033193 | -3.762945 | 3.015723  |
| H | -2.467043 | -1.962848 | 4.113524  |
| H | -2.748467 | -4.372436 | 3.562960  |
| H | -1.353348 | -5.387419 | 1.757771  |
| H | 0.285121  | -3.996911 | 0.504528  |
| C | -4.182061 | -1.677863 | -2.782192 |
| C | -3.181873 | -1.218449 | -1.924135 |
| C | -5.464068 | -1.123901 | -2.740401 |
| C | -3.458938 | -0.195469 | -1.007609 |
| C | -5.726607 | -0.106365 | -1.820691 |
| C | -4.743861 | 0.361590  | -0.953347 |
| H | -3.967442 | -2.474755 | -3.492313 |
| H | -2.186181 | -1.650960 | -1.951012 |
| H | -4.948400 | 1.149891  | -0.235578 |

|    |           |           |           |
|----|-----------|-----------|-----------|
| Cl | -7.342543 | 0.599203  | -1.758136 |
| H  | -6.248957 | -1.472760 | -3.406571 |
| H  | 5.340343  | -2.341099 | -3.556752 |
| C  | 5.119140  | -1.955009 | -2.550033 |
| C  | 4.757936  | -3.134499 | -1.634591 |
| C  | 3.958000  | -0.935304 | -2.632613 |
| H  | 6.032331  | -1.453174 | -2.196823 |
| C  | 3.477452  | -3.838827 | -2.108738 |
| C  | 2.652260  | -1.599087 | -2.925558 |
| C  | 2.289041  | -2.850540 | -2.196748 |
| H  | 3.889006  | -0.418464 | -1.656417 |
| H  | 4.179810  | -0.154819 | -3.372639 |
| H  | 1.975611  | -1.169037 | -3.659302 |
| H  | 1.976134  | -2.582569 | -1.168546 |
| H  | 1.421002  | -3.338856 | -2.661852 |
| H  | 3.662546  | -4.278484 | -3.101056 |
| H  | 3.223115  | -4.670204 | -1.435530 |
| H  | 5.591764  | -3.849259 | -1.583808 |
| H  | 4.599863  | -2.767277 | -0.603057 |

**<sup>1</sup>TS6**

|    |           |           |           |
|----|-----------|-----------|-----------|
| H  | -1.593413 | -0.661762 | 2.270476  |
| C  | -2.340865 | -0.171319 | 1.640602  |
| C  | -2.399720 | 1.313128  | 2.038515  |
| N  | -2.019822 | -0.405905 | 0.226101  |
| Co | -0.194863 | -0.211779 | -0.447704 |
| C  | -3.032955 | -0.569090 | -0.593874 |
| O  | -0.646221 | -0.299120 | -2.273182 |
| N  | 0.112471  | -2.135540 | -0.508758 |
| C  | 1.073662  | -2.629287 | -1.248180 |
| O  | 1.612151  | 0.235022  | -1.076614 |
| C  | -0.646870 | -3.111220 | 0.291038  |
| H  | -0.549423 | -4.088646 | -0.198971 |
| C  | -0.120153 | -3.227560 | 1.745403  |
| H  | -3.312823 | -0.641866 | 1.855179  |
| H  | -1.706381 | -2.843397 | 0.294177  |

|   |           |           |           |
|---|-----------|-----------|-----------|
| H | 1.135073  | -3.719926 | -1.294160 |
| O | 1.291945  | -3.196354 | 1.809449  |
| H | -0.440061 | -4.195768 | 2.148456  |
| H | -0.558878 | -2.442887 | 2.376111  |
| H | 1.533106  | -2.275965 | 1.599612  |
| H | -2.682992 | 1.369830  | 3.101874  |
| O | -3.278890 | 2.082488  | 1.222528  |
| H | -1.412157 | 1.770687  | 1.935810  |
| H | -4.192332 | 1.928297  | 1.517339  |
| H | -4.023640 | -0.629314 | -0.132747 |
| H | -3.915749 | -0.882408 | -2.527383 |
| C | -2.988425 | -0.691661 | -1.997508 |
| C | -1.825184 | -0.543766 | -2.726636 |
| H | -1.865351 | -0.623479 | -3.820077 |
| H | 3.162159  | -0.133751 | -2.327583 |
| C | 2.301448  | -0.584803 | -1.817504 |
| C | 2.066302  | -1.924305 | -1.977074 |
| H | 2.731982  | -2.499807 | -2.612181 |
| O | 0.571495  | -0.285248 | 1.374608  |
| C | 1.327858  | 0.607220  | 1.893587  |
| C | 2.193577  | 0.198928  | 3.060684  |
| N | -0.576273 | 1.705414  | -0.551857 |
| O | 1.339899  | 1.811100  | 1.472219  |
| H | 3.242531  | 0.402036  | 2.811010  |
| H | 2.069824  | -0.857027 | 3.316524  |
| H | 1.948699  | 0.824776  | 3.927677  |
| O | 2.995126  | 2.015061  | 0.380702  |
| H | 2.456791  | 1.441463  | -0.267104 |
| C | 4.614343  | 2.490716  | -1.095031 |
| H | 4.058569  | 1.927860  | -0.031716 |
| H | 3.893610  | 2.621323  | -1.897892 |
| H | 4.981692  | 3.416487  | -0.653527 |
| H | 5.359444  | 1.705709  | -1.258867 |
| C | -0.985975 | 2.778643  | -0.669360 |
| C | -1.527971 | 4.125911  | -0.745688 |

|   |           |          |           |
|---|-----------|----------|-----------|
| H | -0.785767 | 4.852722 | -0.395356 |
| H | -2.415061 | 4.165706 | -0.101778 |
| H | -1.811279 | 4.366555 | -1.776827 |

## References

- S1. D. S. Nesterov, E. N. Chygorin, V. N. Kokozay, V. V. Bon, R. Boca, Y. N. Kozlov, L. S. Shul'pina, J. Jezierska, A. Ozarowski, A. J. L. Pombeiro and G. B. Shul'pin, *Inorg. Chem.*, 2012, **51**, 9110-9122.
- S2. Y. G. Li, Q. Wu, L. Lecren and R. Clerac, *J. Mol. Struct.*, 2008, **890**, 339-345.
- S3. G. B. Shul'pin, *J. Mol. Catal. A*, 2002, **189**, 39-66.
- S4. Bruker, APEX2 & SAINT, AXS Inc., Madison, WI, 2004.
- S5. G. M. Sheldrick, *Acta Crystallogr. C*, 2015, **71**, 3-8.
- S6. R. V. Ottenbacher, E. P. Talsi and K. P. Bryliakov, *ACS Catal.*, 2015, **5**, 39-44.
- S7. O. V. Nesterova, M. N. Kopylovich and D. S. Nesterov, *RSC Adv.*, 2016, **6**, 93756-93767.
- S8. D. S. Nesterov, O. V. Nesterova, M. N. Kopylovich and A. J. L. Pombeiro, *Mol. Catal.*, 2018, **459**, 8-15.
- S9. A. D. Becke, *J. Chem. Phys.*, 1993, **98**, 5648-5652.
- S10. C. T. Lee, W. T. Yang and R. G. Parr, *Phys. Rev. B*, 1988, **37**, 785-789.
- S11. M. Reiher, O. Salomon and B. A. Hess, *Theor. Chem. Acc.*, 2001, **107**, 48-55.
- S12. O. Salomon, M. Reiher and B. A. Hess, *J. Chem. Phys.*, 2002, **117**, 4729-4737.
- S13. Frisch, M. J.; Trucks, G. W.; Schlegel, H. B.; Scuseria, G. E.; Robb, M. A.; Cheeseman, J. R.; Scalmani, G.; Barone, V.; Mennucci, B.; Petersson, G. A.; Nakatsuji, H.; Caricato, M.; Li, X.; Hratchian, H. P.; Izmaylov, A. F.; Bloino, J.; Zheng, G.; Sonnenberg, J. L.; Hada, M.; Ehara, M.; Toyota, K.; Fukuda, R.; Hasegawa, J.; Ishida, M.; Nakajima, T.; Honda, Y.; Kitao, O.; Nakai, H.; Vreven, T.; Montgomery, J. A., Jr.; Peralta, J. E.; Ogliaro, F.; Bearpark, M.; Heyd, J. J.; Brothers, E.; Kudin, K. N.; Staroverov, V. N.; Kobayashi, R.; Normand, J.; Raghavachari, K.; Rendell, A.; Burant, J. C.; Iyengar, S. S.; Tomasi, J.; Cossi, M.; Rega, N.; Millam, J. M.; Klene, M.; Knox, J. E.; Cross, J. B.; Bakken, V.; Adamo, C.; Jaramillo, J.; Gomperts, R.; Stratmann, R. E.; Yazyev, O.; Austin, A. J.; Cammi, R.; Pomelli, C.; Ochterski, J. W.; Martin, R. L.; Morokuma, K.; Zakrzewski, V. G.; Voth, G. A.; Salvador, P.; Dannenberg, J. J.; Dapprich, S.; Daniels, A. D.; Farkas, Ö.; Foresman, J. B.; Ortiz, J. V.; Cioslowski, J.; Fox, D. J. Gaussian 09, Revision A.01; Gaussian, Inc.: Wallingford, CT, 2009.
- S14. M. Dolg, U. Wedig, H. Stoll and H. Preuss, *J. Chem. Phys.*, 1987, **86**, 866-872.
- S15. C. Gonzalez and H. B. Schlegel, *J. Chem. Phys.*, 1991, **95**, 5853-5860.
- S16. C. Gonzalez and H. B. Schlegel, *J. Chem. Phys.*, 1989, **90**, 2154-2161.
- S17. C. Gonzalez and H. B. Schlegel, *J. Phys. Chem.*, 1990, **94**, 5523-5527.
- S18. J. Tomasi and M. Persico, *Chem. Rev.*, 1994, **94**, 2027-2094.
- S19. V. Barone and M. Cossi, *J. Phys. Chem. A*, 1998, **102**, 1995-2001.
- S20. D. H. Wertz, *J. Am. Chem. Soc.*, 1980, **102**, 5316-5322.
- S21. J. Cooper and T. Ziegler, *Inorg. Chem.*, 2002, **41**, 6614-6622.
- S22. V. Korobov and V. Ochkov, *Chemical Kinetics with Mathcad and Maple*, Springer, 2011.
- S23. O. V. Nesterova, D. S. Nesterov, B. Vranovicova, R. Boca and A. J. L. Pombeiro, *Dalton Trans.*, 2018, **47**, 10941-10952.
- S24. A. Bravo, F. Fontana, F. Minisci and A. Serri, *J. Chem. Soc., Chem. Commun.*, 1996, 1843-1844.
- S25. A. Bravo, H. R. Bjorsvik, F. Fontana, F. Minisci and A. Serri, *J. Org. Chem.*, 1996, **61**, 9409-9416.
- S26. A. A. Fokin and P. R. Schreiner, *Chem. Rev.*, 2002, **102**, 1551-1593.
- S27. H. J. Schneider and W. Muller, *J. Org. Chem.*, 1985, **50**, 4609-4615.
- S28. J. L. Holmes, McGilliv.D and R. T. B. Rye, *Org. Mass Spectrom.*, 1973, **7**, 347-356.
- S29. R. H. Shapiro, S. P. Levine and A. M. Duffield, *Org. Mass Spectrom.*, 1971, **5**, 383-&.
- S30. O. V. Nesterova, M. N. Kopylovich and D. S. Nesterov, *Inorganics*, 2019, **7**, 19.
